# Supplementary material for: Synthesis and AChE-Inhibitory Activity of New Benzimidazole Derivatives
Source: MDPI journal article supplement (doi:10.3390/molecules24050861), 2019-02-28
Supplement: s1 [file s1]

## SUPPORTING INFORMATION

# SYNTHESIS AND AChE INHIBITORY ACTIVITY OF NEW BENZIMIDAZOLE DERIVATIVES

Ulviye ACAR ÇEVİK<sup>1,2</sup>, Begüm Nurpelin SAĞLIK<sup>1,2</sup>, Serkan LEVENT<sup>1,2</sup>, Derya OSMANİYE<sup>1,2</sup>, Betül KAYA  
ÇAVUŞOĞLU<sup>1</sup>, Yusuf ÖZKAY\*<sup>1,2</sup>, Zafer Asım KAPLANCIKLİ<sup>1</sup>

<sup>1</sup> Department of Pharmaceutical Chemistry, Faculty of Pharmacy, Anadolu University, Eskişehir, Turkey

<sup>2</sup> Doping and Narcotic Compounds Analysis Laboratory, Faculty of Pharmacy, Anadolu University, Eskişehir, Turkey

\* Correspondence: yozkay@anadolu.edu.tr; Tel.: +90-222-335-0580/3603

Academic Editor: name

Received: date; Accepted: date; Published: date

\* Corresponding author.

*E-mail address:*

*Tel:* +90-222-3350580/ *Fax:* +90-222-3350750.

*Address:* Anadolu University, Faculty of Pharmacy, Department of Pharmaceutical Chemistry,  
26470, Eskişehir, Turkey.

2-(4-(4-Methyl-5-(2-(4-cyanophenyl)-2-oxo-ethylthio)-4H-1,2,4-triazol-3-yl)-phenyl)-5(6)-chloro-1H-benzoimidazole (3a)

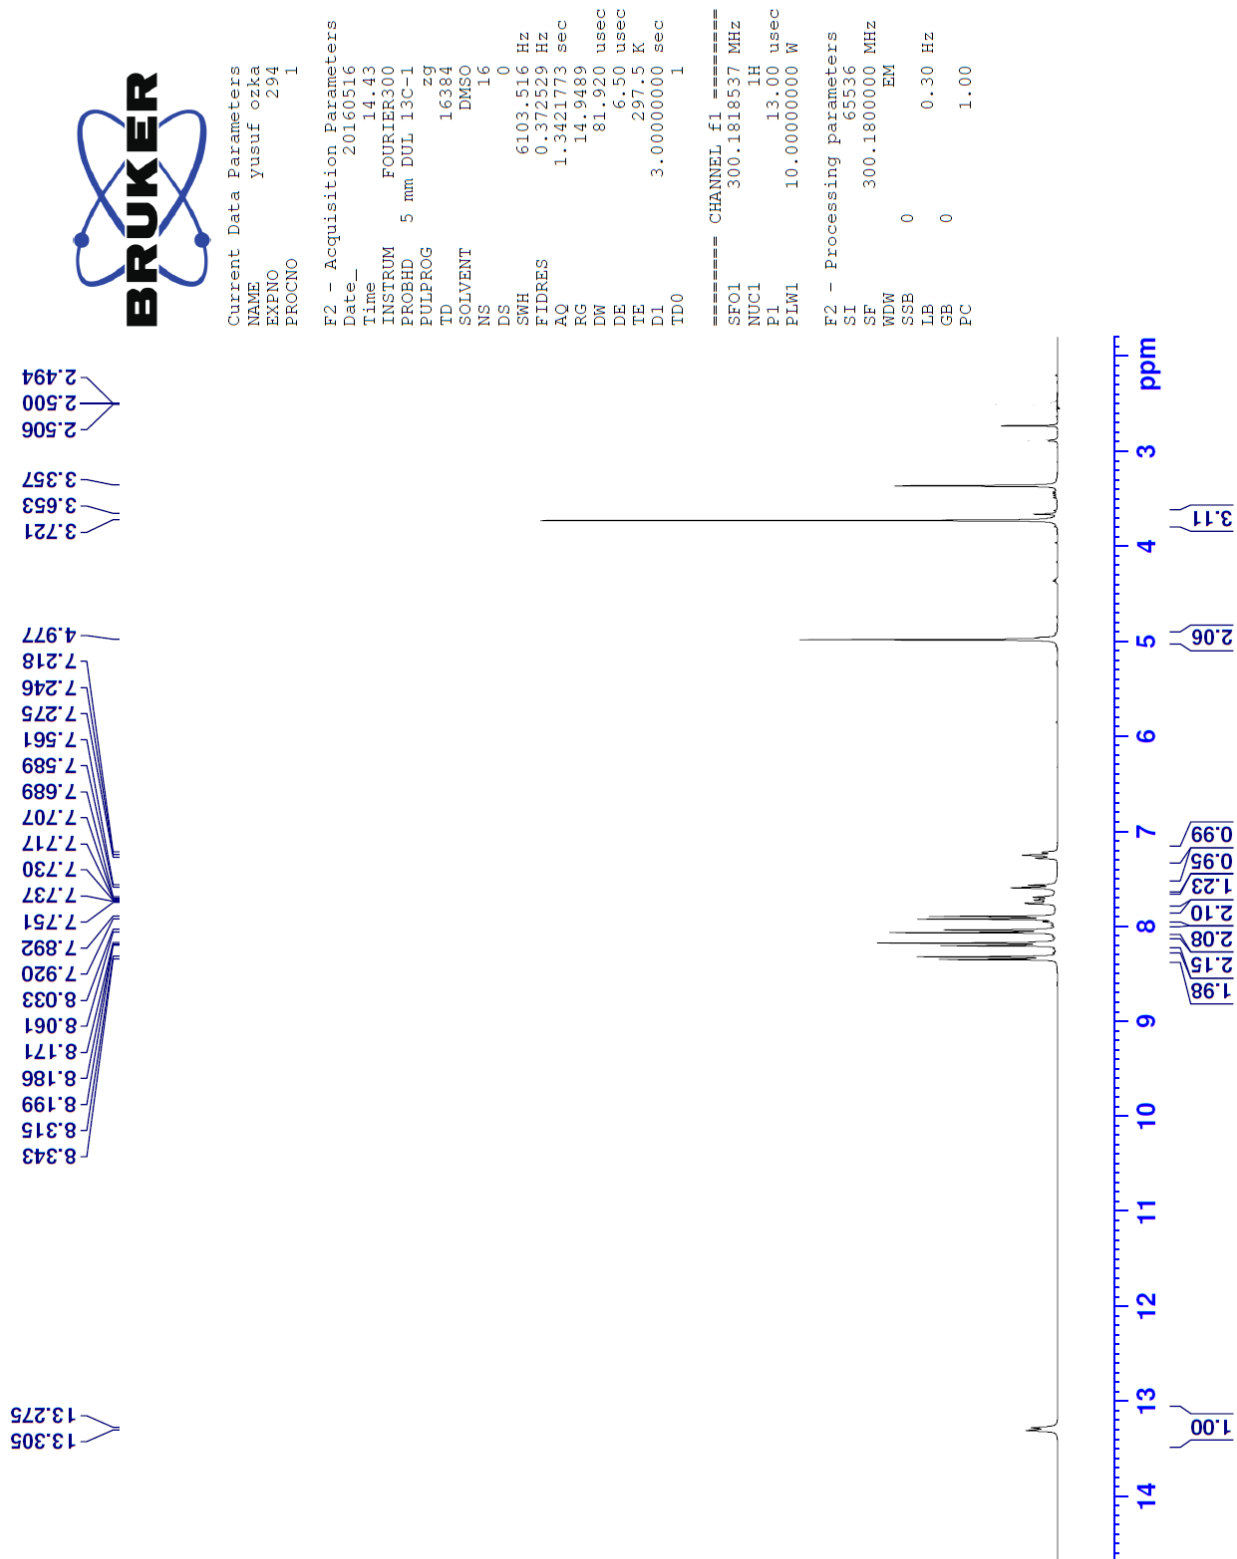

<sup>13</sup>C, TU-22, DMSO, 298K

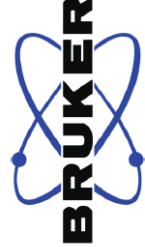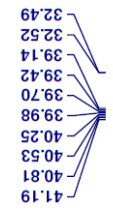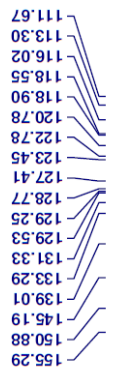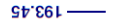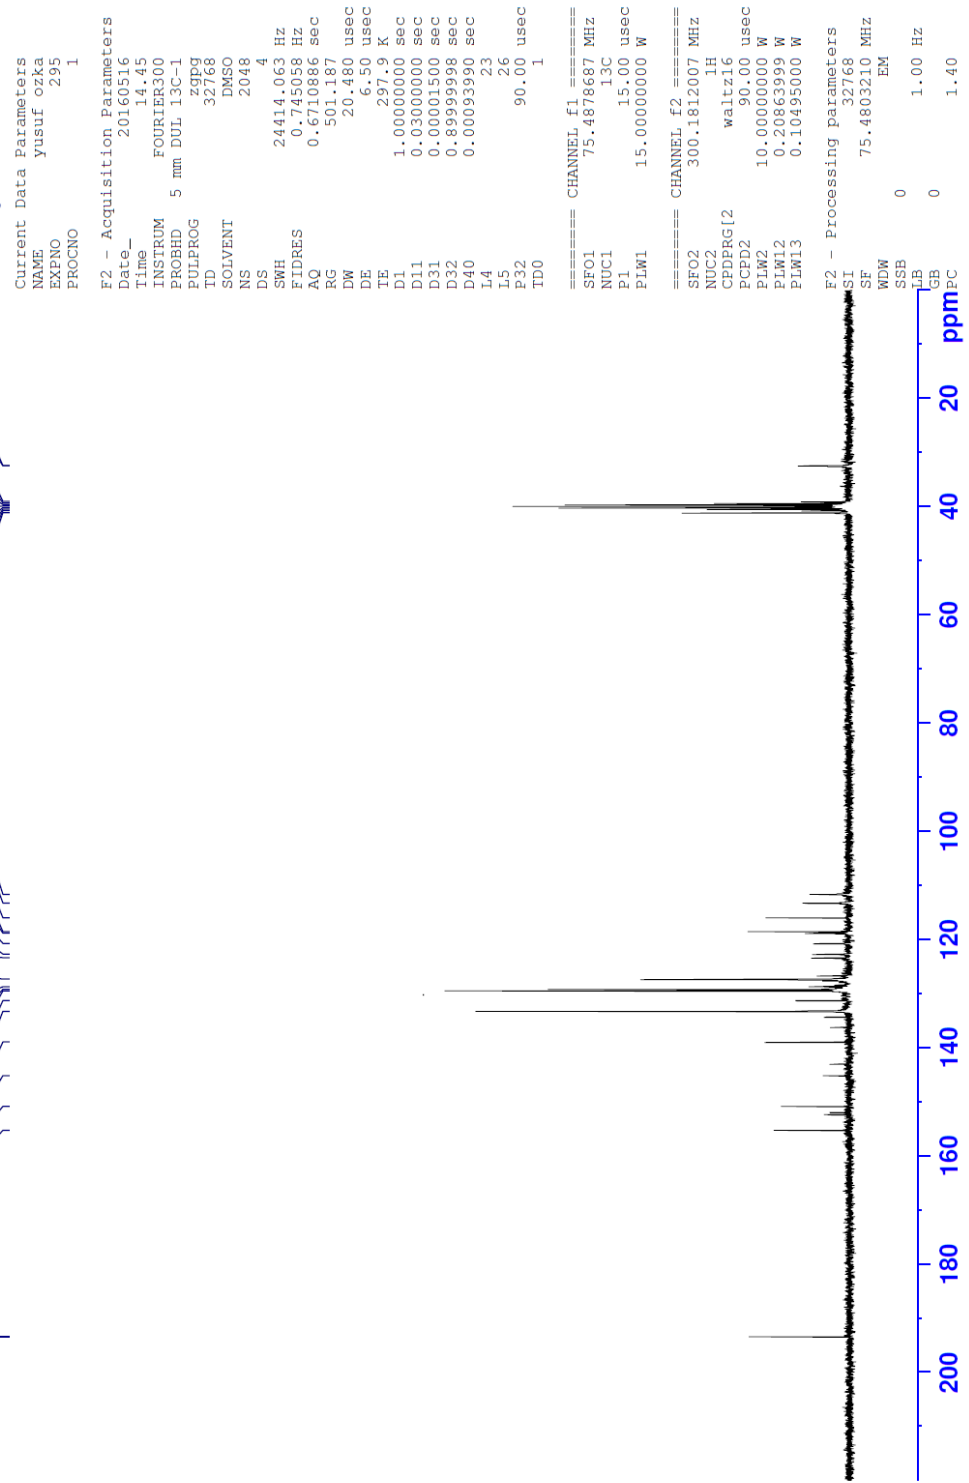

Data File: C:\LabSolutions\Data\Analiz\luac\TU-22\_34.lcd

| Elmt | Val. | Min | Max | Elmt | Val. | Min | Max | Elmt | Val. | Min | Max | Elmt | Val. | Min | Max | Use Adduct |
|------|------|-----|-----|------|------|-----|-----|------|------|-----|-----|------|------|-----|-----|------------|
| H    | 1    | 9   | 40  | O    | 2    | 1   | 2   | S    | 2    | 0   | 2   | Ru   | 2    | 0   | 0   | H          |
| C    | 4    | 11  | 35  | F    | 1    | 0   | 0   | Cl   | 1    | 0   | 1   | I    | 3    | 0   | 0   |            |
| N    | 3    | 0   | 6   | P    | 3    | 0   | 0   | Br   | 1    | 0   | 1   |      |      |     |     |            |

Error Margin (ppm): 5

HC Ratio: unlimited

Max Isotopes: 3

MSn Iso RI (%): 10.00

DBE Range: 17.0 - 20.0

Apply N Rule: yes

Isotope RI (%): 1.00

MSn Logic Mode: AND

Electron Ions: both

Use MSn Info: no

Isotope Res: 10000

Max Results: 500

Event#: 1 MS(E+) Ret. Time : 6.853 -&gt; 6.987 Scan#: 1029 -&gt; 1049

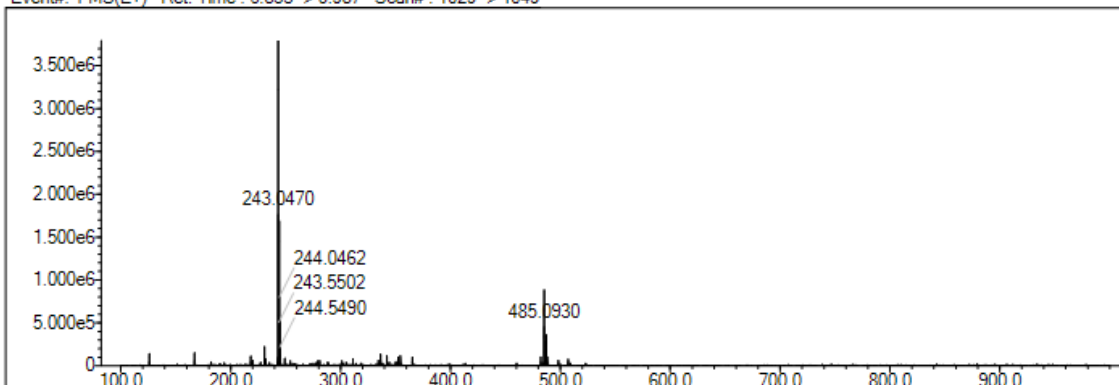

Measured region for 485.0930 m/z

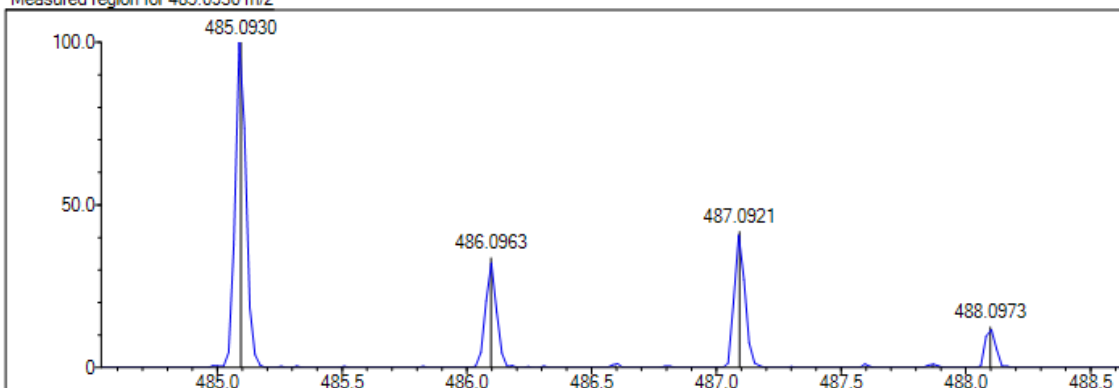

C25 H17 N6 O S Cl [M+H]+ : Predicted region for 485.0946 m/z

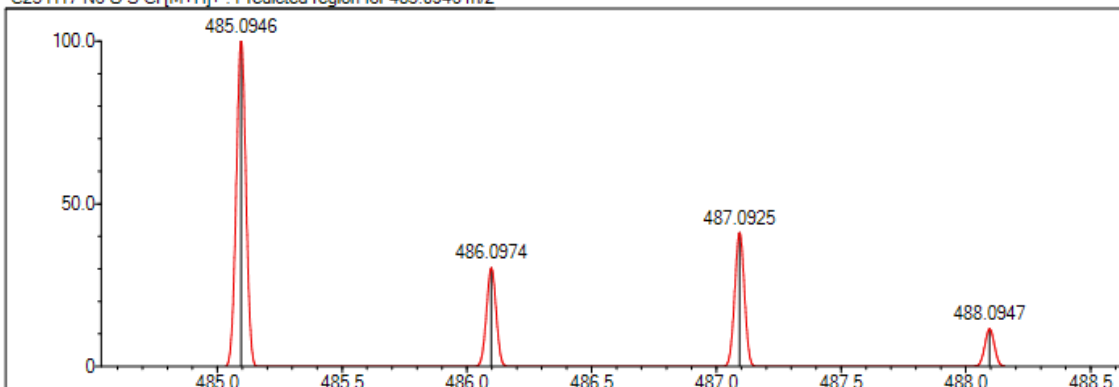

| Rank | Score | Formula (M)       | Ion    | Meas. m/z | Pred. m/z | Df. (mDa) | Df. (ppm) | Iso   | DBE  |
|------|-------|-------------------|--------|-----------|-----------|-----------|-----------|-------|------|
| 1    | 72.38 | C25 H17 N6 O S Cl | [M+H]+ | 485.0930  | 485.0946  | -1.6      | -3.30     | 76.80 | 20.0 |

2-(4-(4-Methyl-5-(2-(4-bromophenyl)-2-oxo-ethylthio)-4H-1,2,4-triazol-3yl)-phenyl)-5(6)-chloro-1H-benzimidazole (3b)

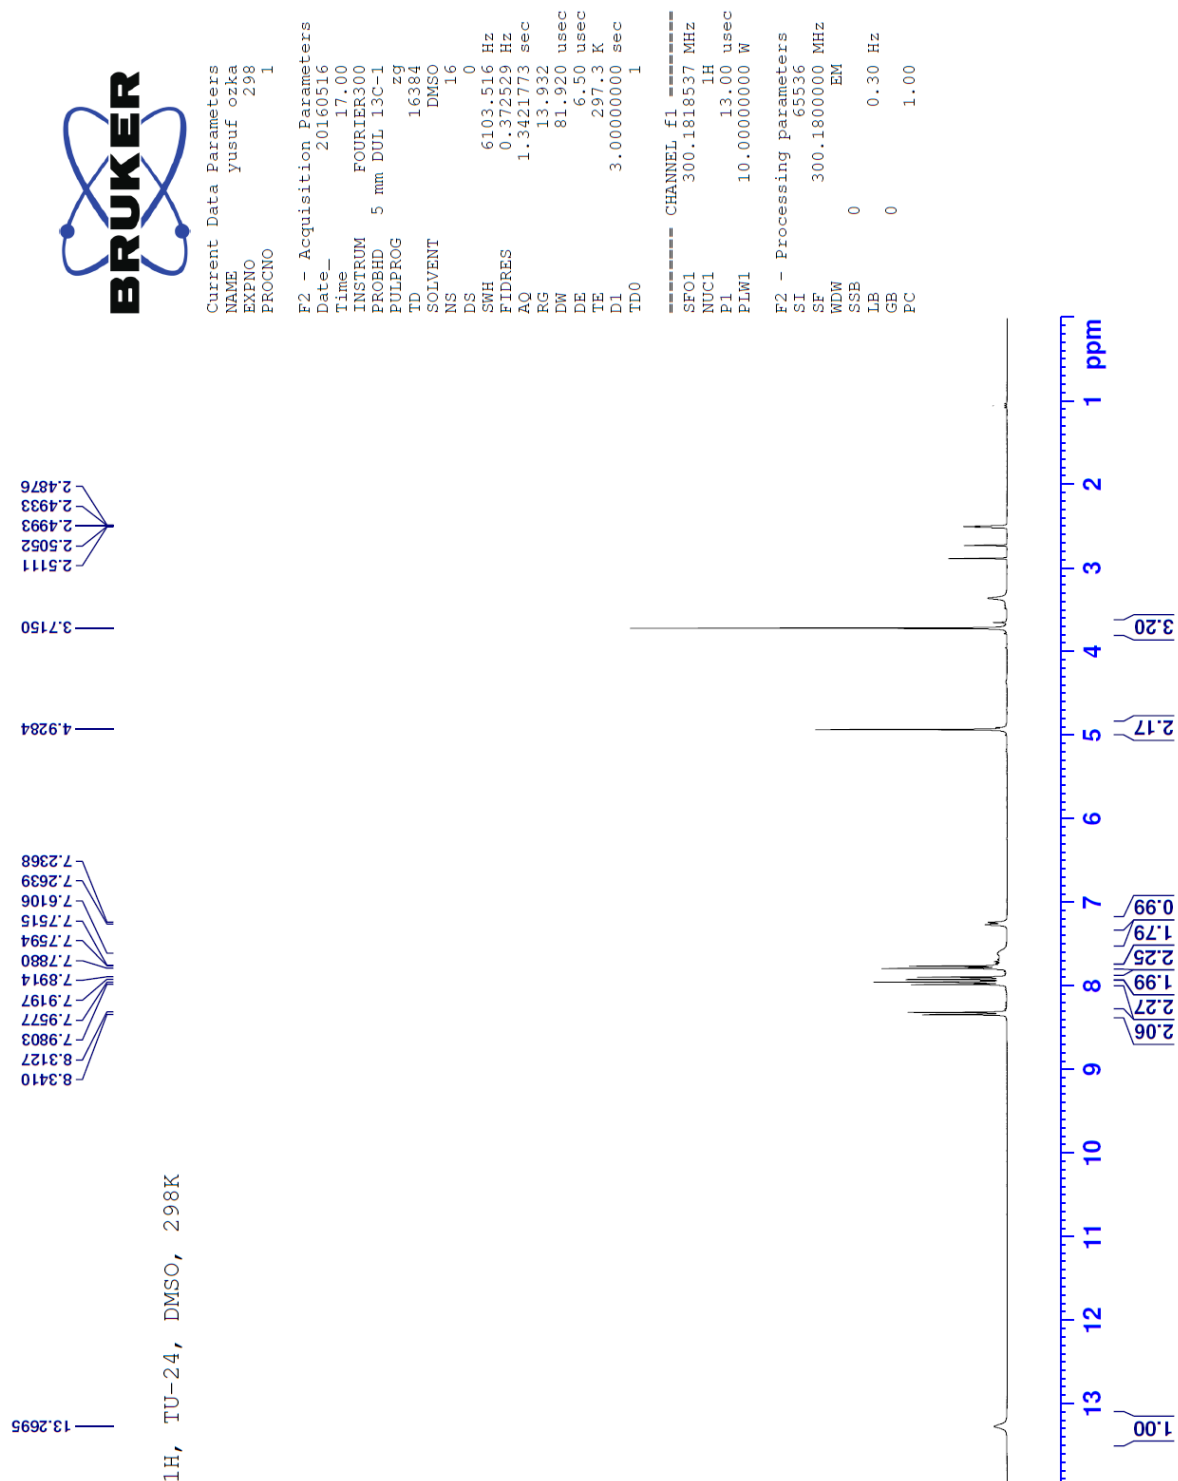

13C, TU-24, DMSO, 298K

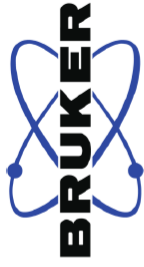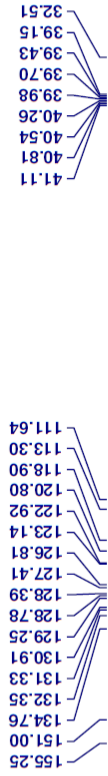

Current Data Parameters  
NAME yusuf ozka  
EXPNO 299  
PROCNO 1

F2 - Acquisition Parameters  
Date\_ 20160516  
Time 17.01  
INSTRUM FOURIER300  
PROBHD 5 mm DUL 13C-1  
PULPROG zgpg  
TD 32768  
SOLVENT DMSO  
NS 2048  
DS 4  
SWH 24414.063 Hz  
FIDRES 0.745058 Hz  
AQ 0.6710886 sec  
RG 501.187  
DW 20.480 usec  
DE 6.50 usec  
TE 298.0 K  
D1 1.00000000 sec  
D11 0.03000000 sec  
D31 0.00001500 sec  
D32 0.89999998 sec  
D40 0.00093990 sec  
L4 23  
L5 26  
P32 90.00 usec  
TD0 1

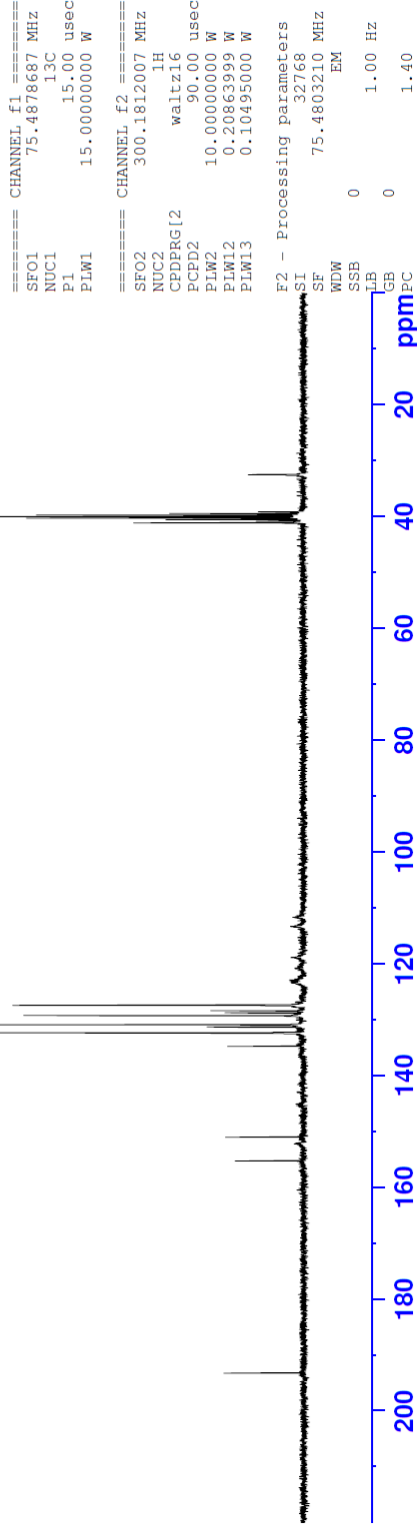

Data File: C:\LabSolutions\Data\Analz\luac\TU-24\_36.lcd

| Elmt | Val. | Min | Max | Elmt | Val. | Min | Max | Elmt | Val. | Min | Max | Elmt | Val. | Min | Max | Use Adduct |
|------|------|-----|-----|------|------|-----|-----|------|------|-----|-----|------|------|-----|-----|------------|
| H    | 1    | 9   | 40  | O    | 2    | 1   | 2   | S    | 2    | 0   | 2   | Ru   | 2    | 0   | 0   | H          |
| C    | 4    | 11  | 35  | F    | 1    | 0   | 0   | Cl   | 1    | 0   | 1   | I    | 3    | 0   | 0   |            |
| N    | 3    | 0   | 6   | P    | 3    | 0   | 0   | Br   | 1    | 0   | 1   |      |      |     |     |            |

Error Margin (ppm): 10

HC Ratio: unlimited

Max Isotopes: 3

MSn Iso RI (%): 10.00

DBE Range: 17.0 - 20.0

Apply N Rule: yes

Isotope RI (%): 1.00

MSn Logic Mode: AND

Electron Ions: both

Use MSn Info: no

Isotope Res: 10000

Max Results: 500

Event#: 1 MS(E+) Ret. Time : 7.227 -&gt; 7.453 - 8.160 -&gt; 10.844 Scan#: 1085 -&gt; 1119 - 1225 -&gt; 1627

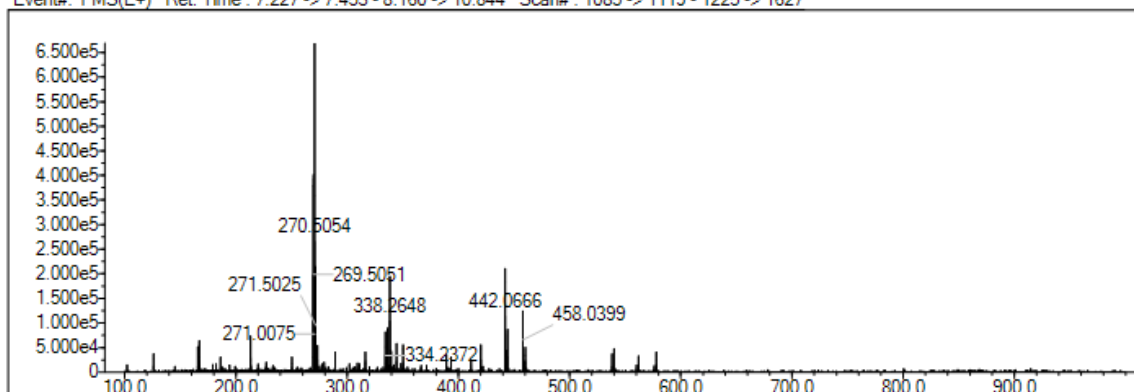

Measured region for 538.0060 m/z

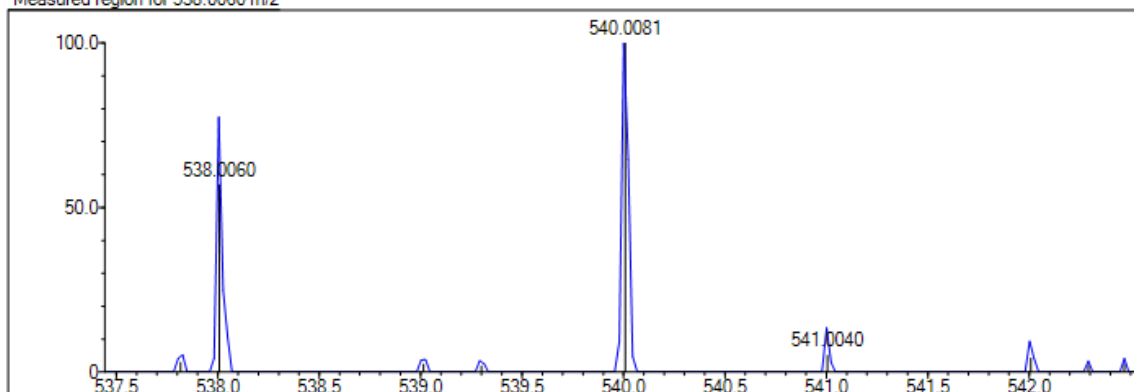

C24 H17 N5 O S Cl Br [M+H]+ : Predicted region for 538.0098 m/z

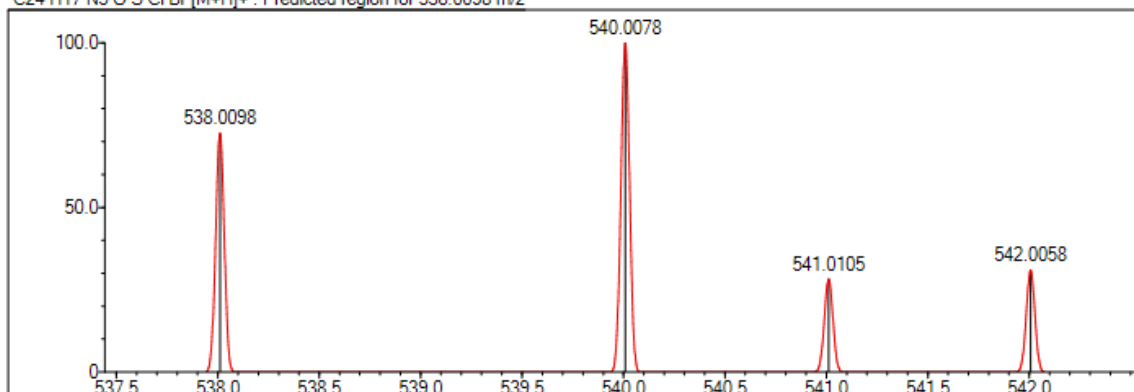

| Rank | Score | Formula (M)          | Ion    | Meas. m/z | Pred. m/z | Df. (mDa) | Df. (ppm) | Iso   | DBE  |
|------|-------|----------------------|--------|-----------|-----------|-----------|-----------|-------|------|
| 1    | 22.67 | C24 H17 N5 O S Cl Br | [M+H]+ | 538.0060  | 538.0098  | -3.8      | -7.06     | 32.66 | 18.0 |

2-(4-(4-Methyl-5-(2-(4-methylphenyl)-2-oxo-ethylthio)-4H-1,2,4-triazol-3-yl)-phenyl)-5(6)-chloro-1H-benzimidazole (3c)

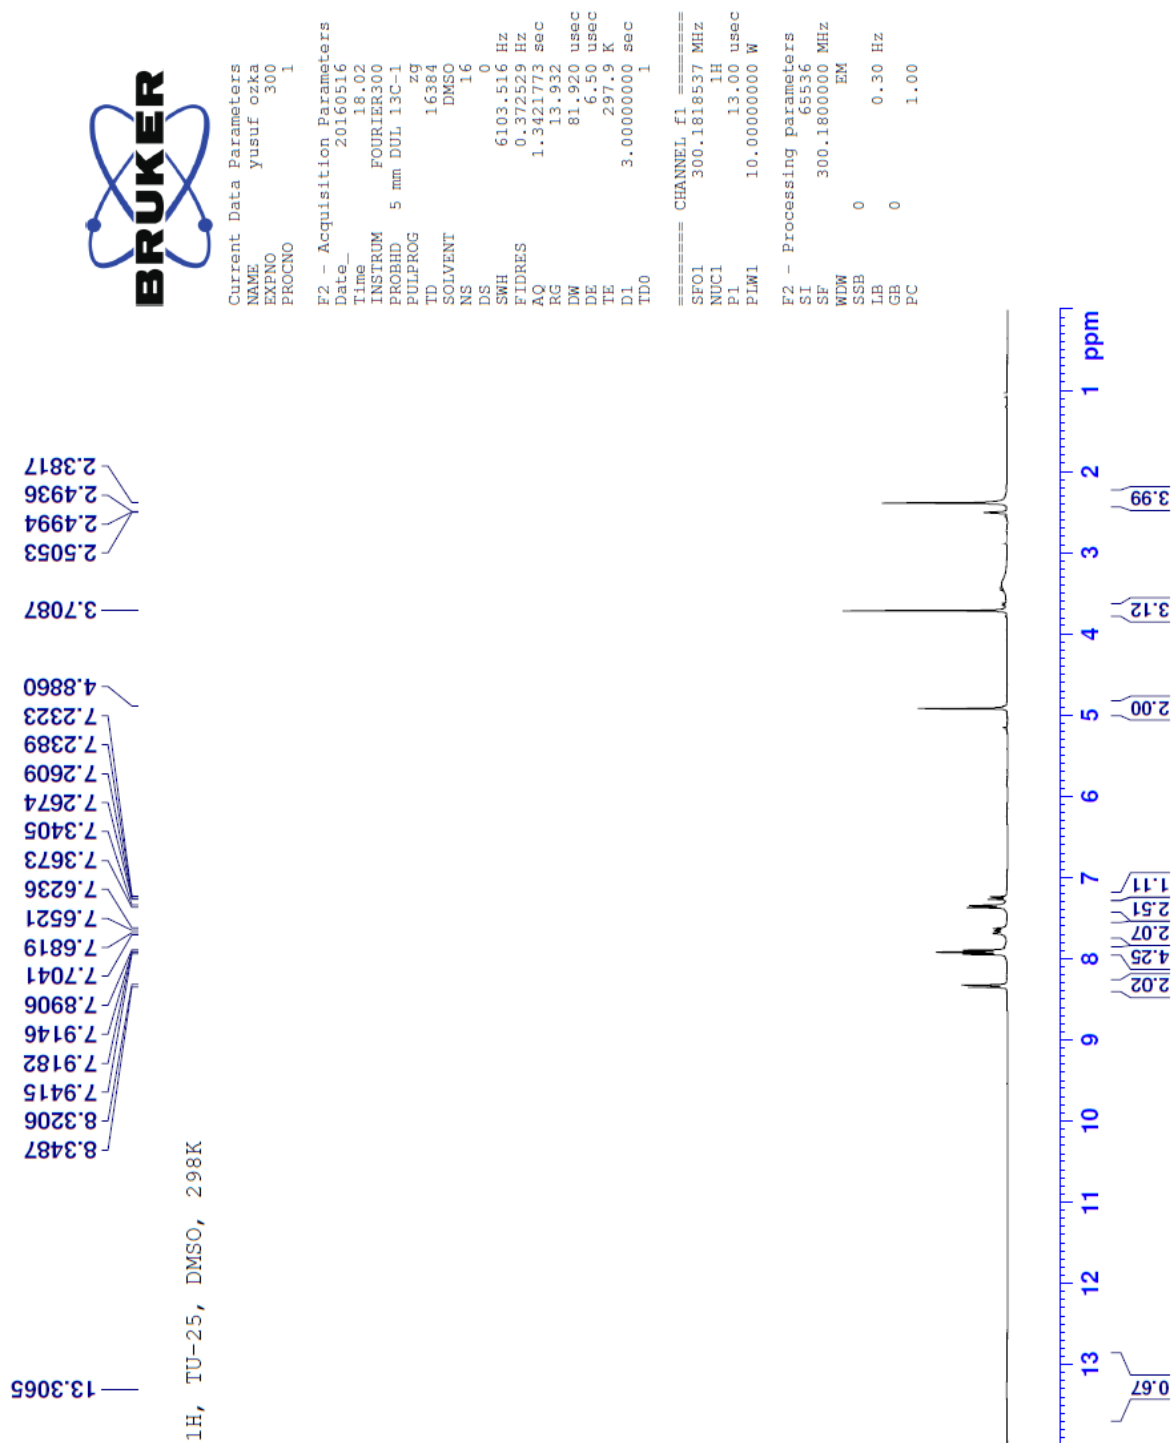



13C, TU-25, DMSO, 298K

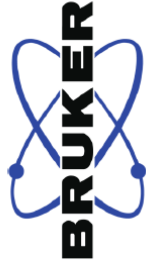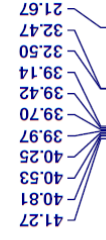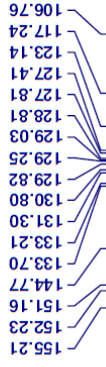

Current Data Parameters  
NAME yusuf ozka  
EXPNO 301  
PROCNO 1

F2 - Acquisition Parameters  
Date\_ 20160516  
Time 18.04  
INSTRUM FOURIER300  
PROBHD 5 mm DUL 13C-1  
PULPROG zgpg  
TD 32768  
SOLVENT DMSO  
NS 2048  
DS 4  
SWH 24414.063 Hz  
FIDRES 0.745058 Hz  
AQ 0.6710886 sec  
RG 501.187  
DW 20.480 usec  
DE 6.50 usec  
TE 297.9 K  
D1 1.00000000 sec  
D11 0.03000000 sec  
D31 0.00001500 sec  
D32 0.89999998 sec  
D40 0.00093990 sec  
L4 23  
L5 26  
P32 90.00 usec  
TD0 1

===== CHANNEL f1 =====  
SFO1 75.4878687 MHz  
NUC1 13C  
P1 15.00 usec  
PLW1 15.0000000 W

===== CHANNEL f2 =====  
SFO2 300.1812007 MHz  
NUC2 1H  
CPDPRG[2] waltz16  
PCPD2 90.00 usec  
PLW2 10.0000000 W  
PLW12 0.20863999 W  
PLW13 0.10495000 W

F2 - Processing parameters  
SI 32768  
SF 75.4803210 MHz  
WDW 0  
SSB 0  
LB 1.00 Hz  
GB 0  
PC 1.40

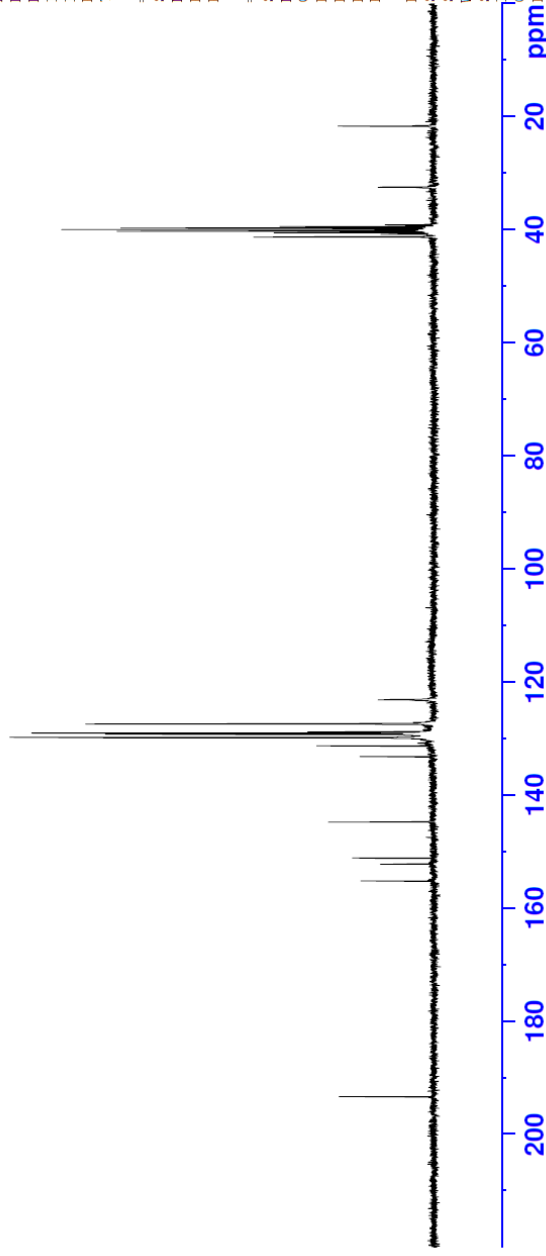

Data File: C:\LabSolutions\Data\Analiz\luc\TU-25\_37.lcd

| Elmt | Val. | Min | Max | Elmt | Val. | Min | Max | Elmt | Val. | Min | Max | Elmt | Val. | Min | Max | Use Adduct |
|------|------|-----|-----|------|------|-----|-----|------|------|-----|-----|------|------|-----|-----|------------|
| H    | 1    | 9   | 40  | O    | 2    | 1   | 2   | S    | 2    | 0   | 2   | Ru   | 2    | 0   | 0   | H          |
| C    | 4    | 11  | 35  | F    | 1    | 0   | 0   | Cl   | 1    | 0   | 1   | I    | 3    | 0   | 0   |            |
| N    | 3    | 0   | 6   | P    | 3    | 0   | 0   | Br   | 1    | 0   | 1   |      |      |     |     |            |

Error Margin (ppm): 10

HC Ratio: unlimited

Max Isotopes: 3

MSn Iso RI (%): 10.00

DBE Range: 17.0 - 20.0

Apply N Rule: yes

Isotope RI (%): 1.00

MSn Logic Mode: AND

Electron Ions: both

Use MSn Info: no

Isotope Res: 10000

Max Results: 500

Event#: 1 MS(E+) Ret. Time : 7.040 -&gt; 7.400 - 7.933 -&gt; 10.272 Scan#: 1057 -&gt; 1111 - 1191 -&gt; 1541

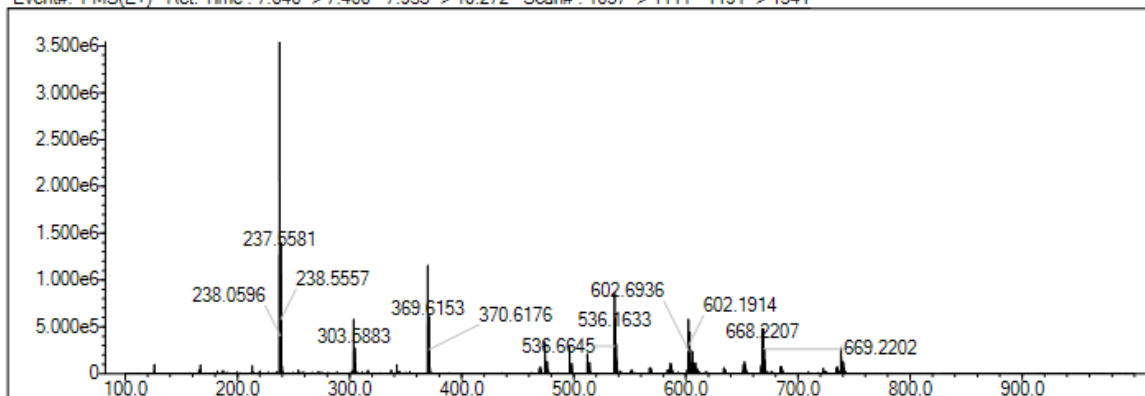

Measured region for 474.1148 m/z

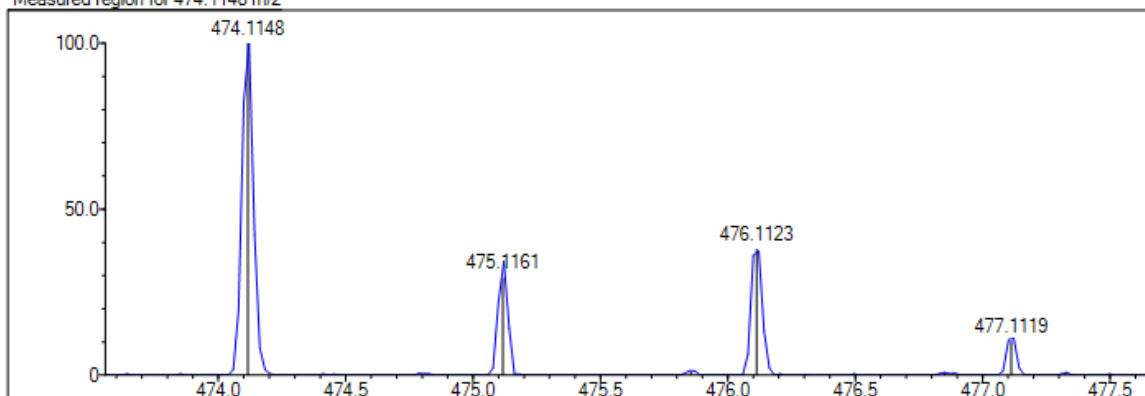

C25 H20 N5 O S Cl [M+H]+ : Predicted region for 474.1150 m/z

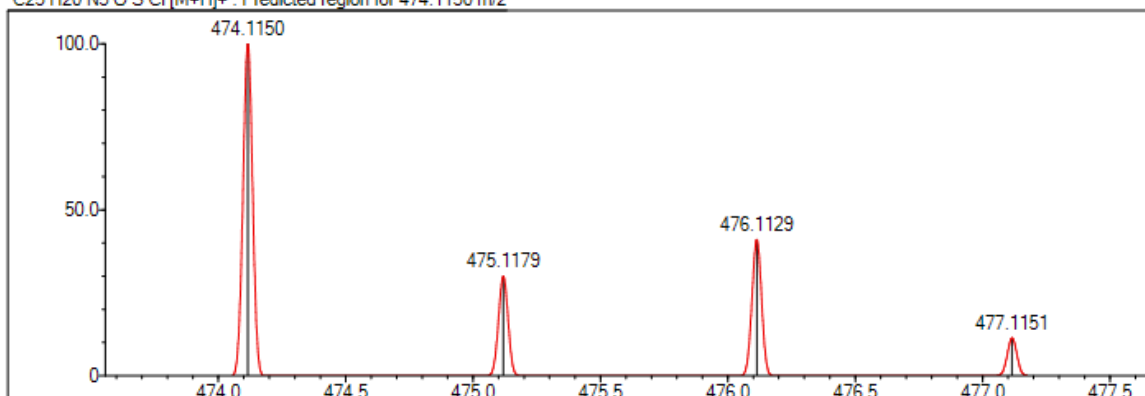

| Rank | Score | Formula (M)       | Ion    | Meas. m/z | Pred. m/z | Df. (mDa) | Df. (ppm) | Iso   | DBE  |
|------|-------|-------------------|--------|-----------|-----------|-----------|-----------|-------|------|
| 1    | 88.86 | C25 H20 N5 O S Cl | [M+H]+ | 474.1148  | 474.1150  | -0.2      | -0.42     | 88.86 | 18.0 |

2-(4-(4-Methyl-5-(2-(3,4-dihydroxyphenyl)-2-oxo-ethylthio)-4H-1,2,4-triazol-3yl)-phenyl)-5(6)-chloro-1H- benzimidazole (3d)

1H, TU-29, DMSO, 298K

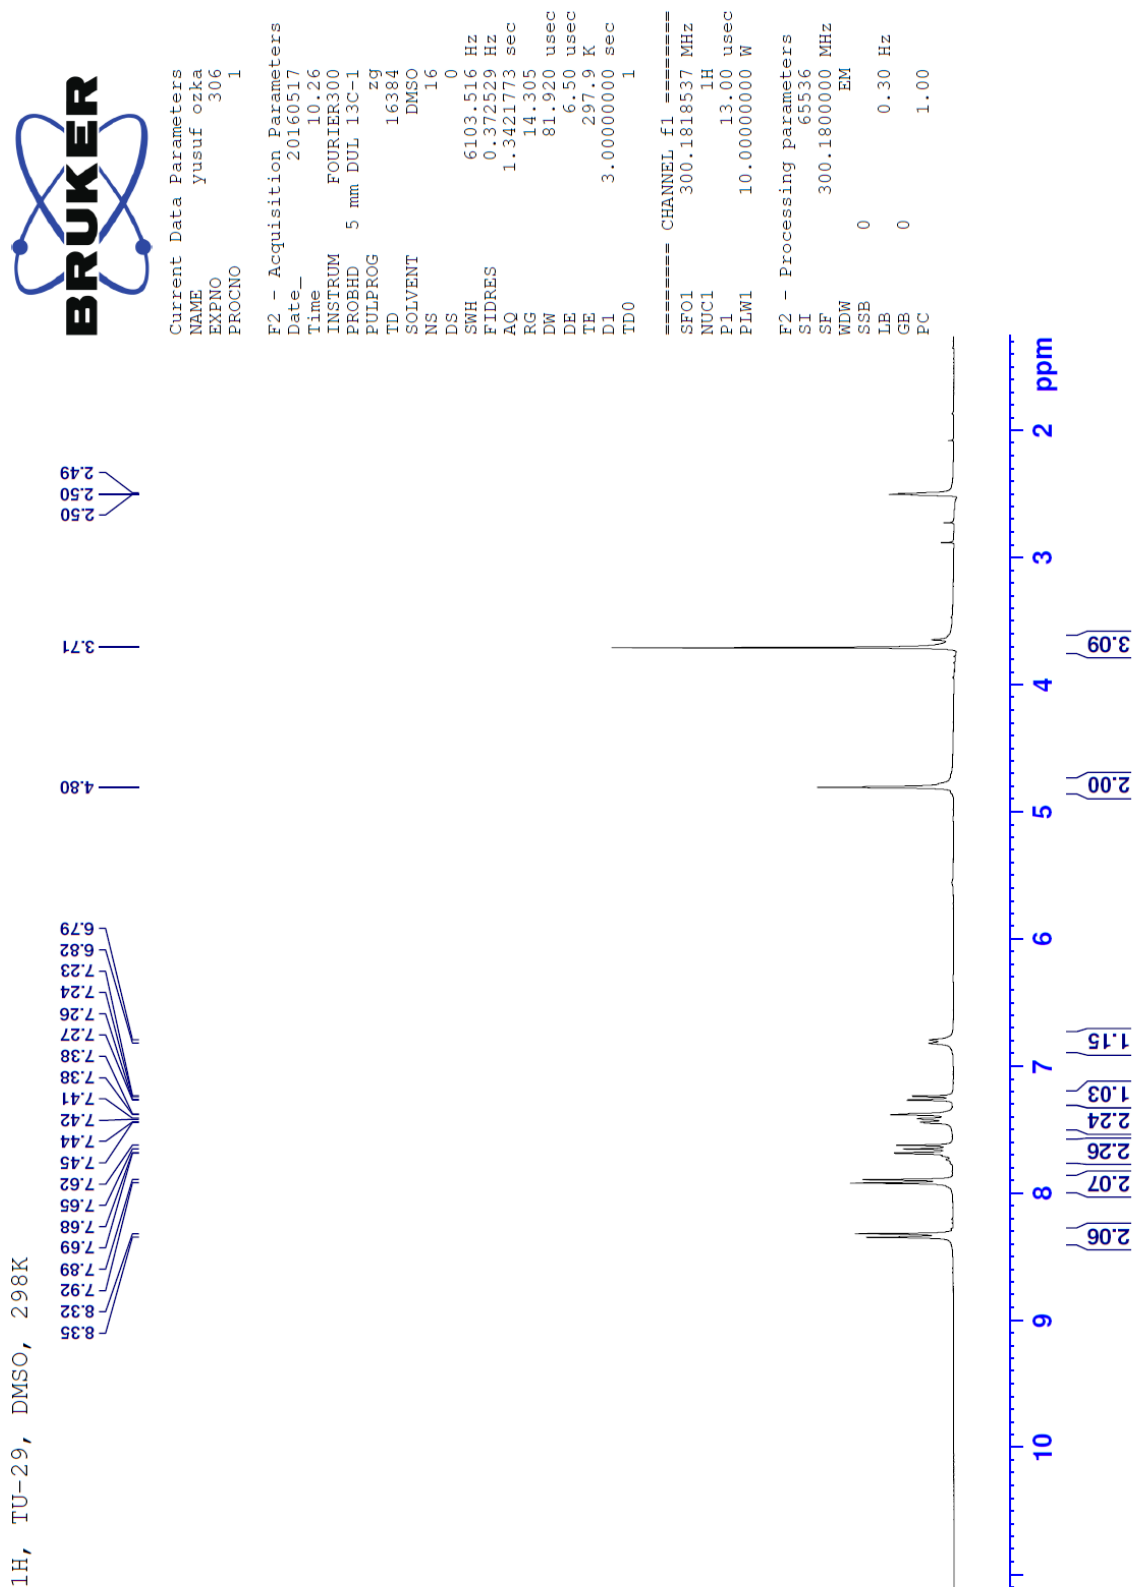

<sup>13</sup>C, TU-29, DMSO, 298K

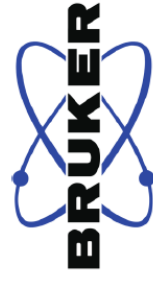

191.65  
155.18  
152.79  
152.26  
151.41  
146.15  
138.96  
131.30  
130.77  
129.26  
128.85  
128.47  
127.41  
127.16  
123.13  
122.70  
115.62  
115.26  
114.67

41.09  
40.79  
40.51  
40.23  
39.95  
39.67  
39.40  
39.12  
32.47

Current Data Parameters  
NAME yusuf\_ozka  
EXPNO 307  
PROCNO 1

F2 - Acquisition Parameters  
Date\_ 20160517  
Time 10.28  
INSTRUM FOURIER300  
PROBHD 5 mm DUL 13C-1  
PULPROG zgpg  
ID 32768  
SOLVENT DMSO  
NS 2048  
DS 4  
SWH 24414.063 Hz  
FIDRES 0.745058 Hz  
AQ 0.6710886 sec  
RG 501.187  
DW 20.480 usec  
DE 6.50 usec  
TE 298.0 K  
D1 1.00000000 sec  
D11 0.03000000 sec  
D31 0.00001500 sec  
D32 0.89999998 sec  
D40 0.00093990 sec  
L4 23  
L5 26  
P32 90.00 usec  
TD0 1

==== CHANNEL f1 =====  
SFO1 75.4878687 MHz  
NUC1 <sup>13</sup>C  
P1 15.00 usec  
PLW1 15.00000000 W

==== CHANNEL f2 =====  
SFO2 300.1812007 MHz  
NUC2 <sup>1</sup>H  
PCPD2 waitz16  
PLW2 90.00 usec  
PLW12 10.00000000 W  
PLW13 0.20863999 W  
PLW13 0.10495000 W

F2 - Processing parameters  
SI 32768  
SF 75.4803210 MHz  
WDW 0  
SSB 0  
LB 1.00 Hz  
GB 0  
PC 1.40

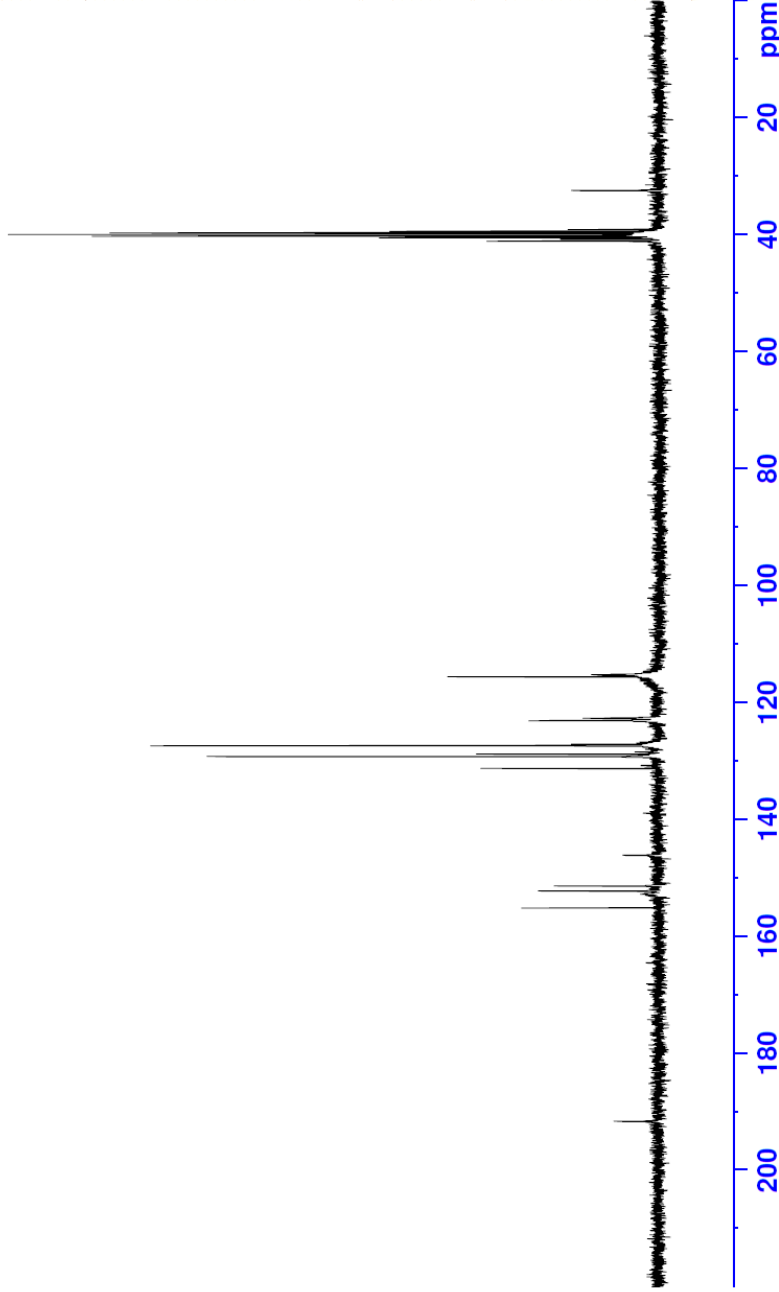

Data File: C:\LabSolutions\Data\Analiz\aac\TU-29\_42.lcd

| Elmt | Val. | Min | Max | Elmt | Val. | Min | Max | Elmt | Val. | Min | Max | Elmt | Val. | Min | Max | Use Adduct |
|------|------|-----|-----|------|------|-----|-----|------|------|-----|-----|------|------|-----|-----|------------|
| H    | 1    | 9   | 40  | O    | 2    | 3   | 3   | S    | 2    | 0   | 2   | Ru   | 2    | 0   | 0   | H          |
| C    | 4    | 11  | 35  | F    | 1    | 0   | 0   | Cl   | 1    | 0   | 1   | I    | 3    | 0   | 0   |            |
| N    | 3    | 0   | 6   | P    | 3    | 0   | 0   | Br   | 1    | 0   | 1   |      |      |     |     |            |

Error Margin (ppm): 10

HC Ratio: unlimited

Max Isotopes: 3

MSn Iso RI (%): 10.00

DBE Range: 17.0 - 20.0

Apply N Rule: yes

Isotope RI (%): 1.00

MSn Logic Mode: AND

Electron Ions: both

Use MSn Info: no

Isotope Res: 10000

Max Results: 500

Event#: 1 MS(E+) Ret. Time: 6.160 -&gt; 6.787 -&gt; 7.627 -&gt; 8.973 Scan#: 925 -&gt; 1019 - 1145 -&gt; 1347

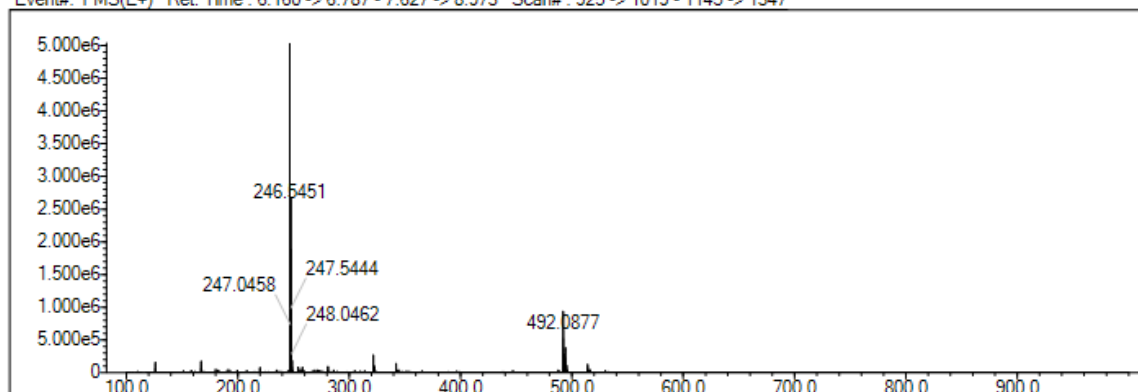

Measured region for 492.0877 m/z

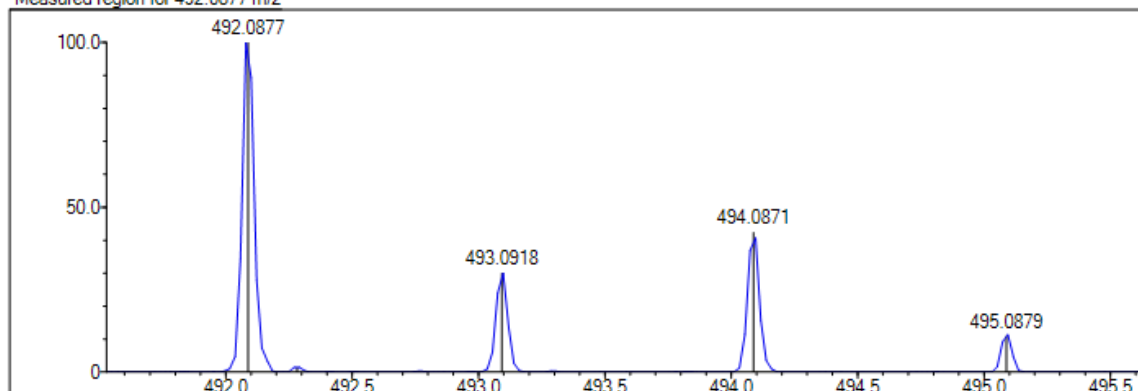

C24 H18 N5 O3 S Cl [M+H]+ : Predicted region for 492.0892 m/z

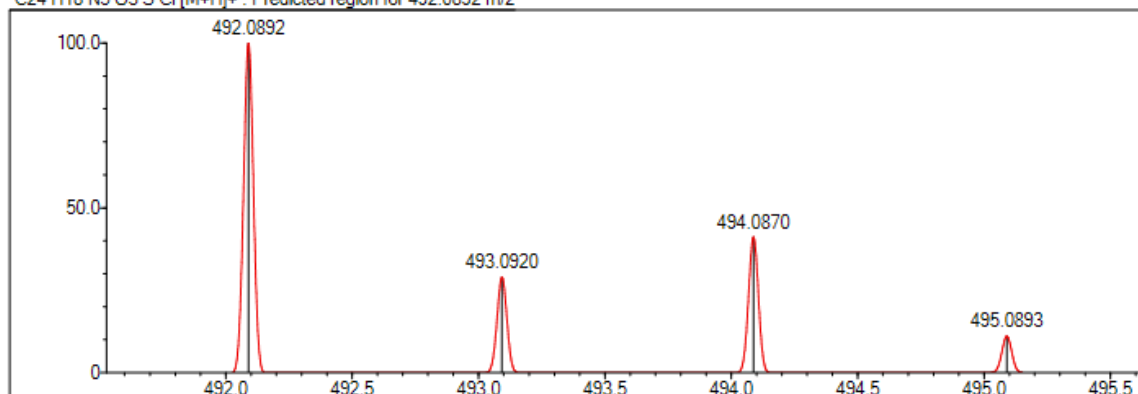

| Rank | Score | Formula (M)        | Ion    | Meas. m/z | Pred. m/z | Df. (mDa) | Df. (ppm) | Iso   | DBE  |
|------|-------|--------------------|--------|-----------|-----------|-----------|-----------|-------|------|
| 1    | 88.95 | C24 H18 N5 O3 S Cl | [M+H]+ | 492.0877  | 492.0892  | -1.5      | -3.05     | 93.75 | 18.0 |

2-(4-(4-Ethyl-5-(2-(4-cyanophenyl)-2-oxo-ethylthio)-4H-1,2,4-triazol-3-yl)-phenyl)-5(6)-chloro-1H-benzoimidazole (3e)

<sup>1</sup>H, TU-32, DMSO, 298K

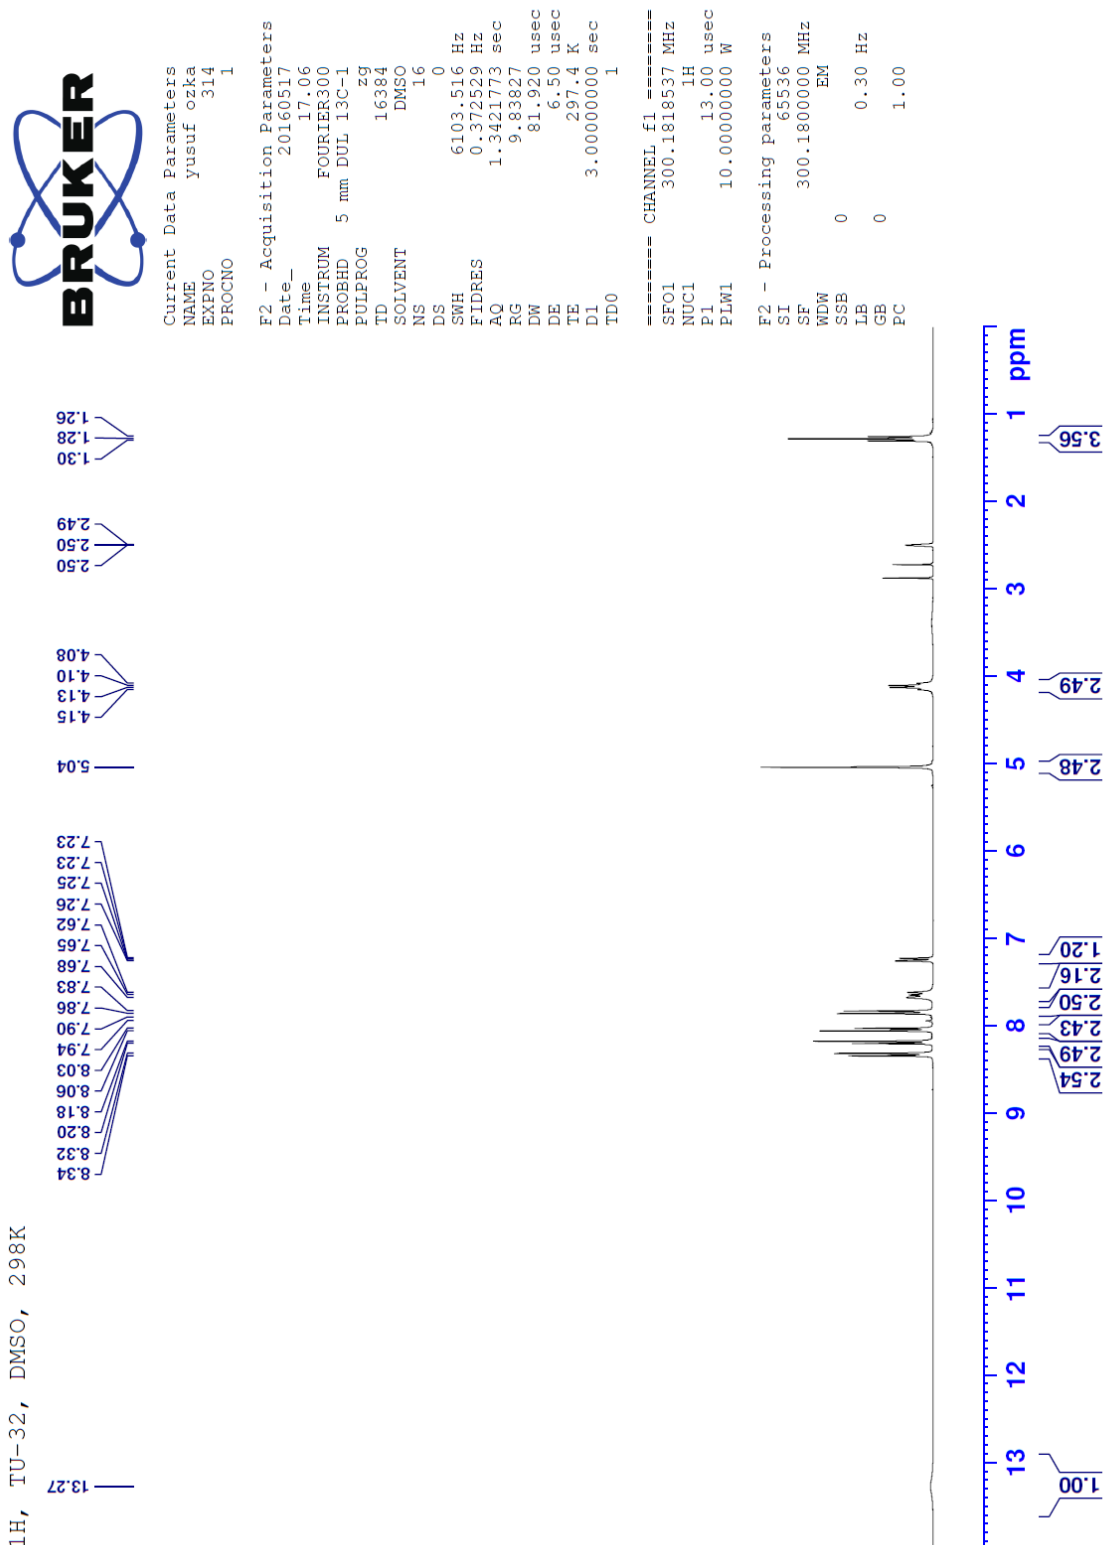

13C, TU-32, DMSO, 298K

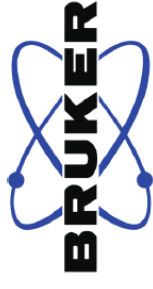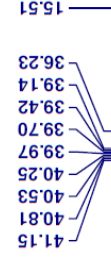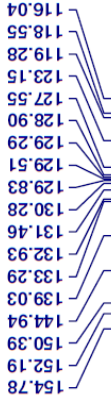

Current Data Parameters  
NAME yusuf ozka  
EXPNO 315  
PROCNO 1

F2 - Acquisition Parameters

Date\_ 20160517  
Time 17.08  
INSTRUM FOURIER300  
PROBHD 5 mm DUL 13C-1  
PULPROG zgpg  
TD 32768  
SOLVENT DMSO  
NS 2048  
DS 4  
SWH 24414.063 Hz  
FIDRES 0.745058 Hz  
AQ 0.6710886 sec  
RG 501.187  
DW 20.480 usec  
DE 6.50 usec  
TE 297.9 K  
D1 1.00000000 sec  
D11 0.03000000 sec  
D31 0.00001500 sec  
D32 0.89999998 sec  
D40 0.00093990 sec  
L4 23  
L5 26  
F32 90.00 usec  
TD0 1

===== CHANNEL f1 =====  
SFO1 75.4878687 MHz  
NUC1 13C  
P1 15.00 usec  
PLW1 15.00000000 W

===== CHANNEL f2 =====  
SFO2 300.1812007 MHz  
NUC2 1H  
CPDPRG2 waltz16  
PCPD2 90.00 usec  
PLW2 10.00000000 W  
PLW12 0.20863999 W  
PLW13 0.10495000 W

F2 - Processing parameters

SI 32768  
SF 75.4803210 MHz  
WDW EM  
SSB 0  
LB 1.00 Hz  
GB 0  
PC 1.40

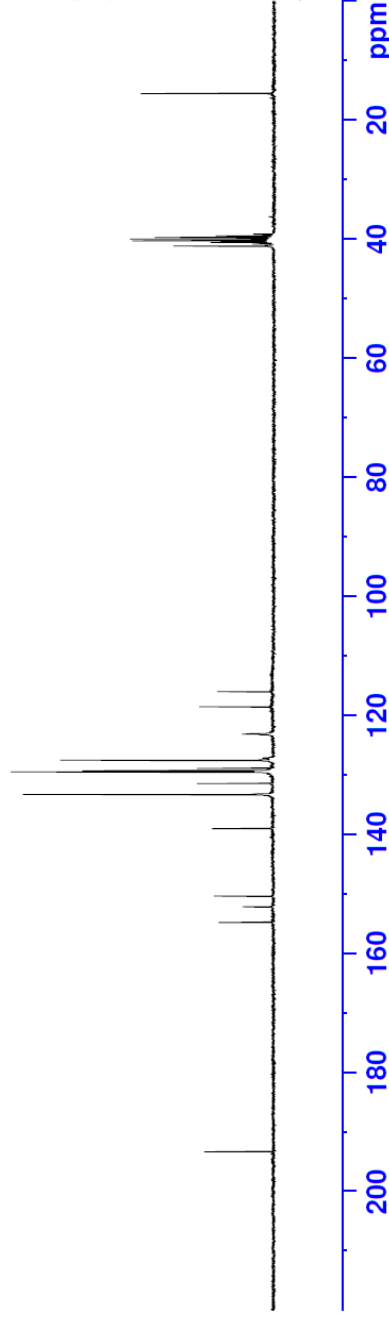

Data File: C:\LabSolutions\Data\Analiz\aac\TU-32\_46.lcd

| Elmt | Val. | Min | Max | Elmt | Val. | Min | Max | Elmt | Val. | Min | Max | Elmt | Val. | Min | Max | Use Adduct |
|------|------|-----|-----|------|------|-----|-----|------|------|-----|-----|------|------|-----|-----|------------|
| H    | 1    | 9   | 40  | O    | 2    | 1   | 1   | S    | 2    | 0   | 2   | Ru   | 2    | 0   | 0   | H          |
| C    | 4    | 11  | 26  | F    | 1    | 0   | 0   | Cl   | 1    | 0   | 1   | I    | 3    | 0   | 0   |            |
| N    | 3    | 0   | 6   | P    | 3    | 0   | 0   | Br   | 1    | 0   | 1   |      |      |     |     |            |

Error Margin (ppm): 5  
 HC Ratio: unlimited  
 Max Isotopes: 3  
 MSn Iso RI (%): 10.00

DBE Range: 17.0 - 20.0  
 Apply N Rule: yes  
 Isotope RI (%): 1.00  
 MSn Logic Mode: AND

Electron Ions: both  
 Use MSn Info: no  
 Isotope Res: 10000  
 Max Results: 500

Event#: 1 MS(E+) Ret. Time : 7.027 -&gt; 7.347 - 8.240 -&gt; 9.284 Scan# : 1055 -&gt; 1103 - 1237 -&gt; 1393

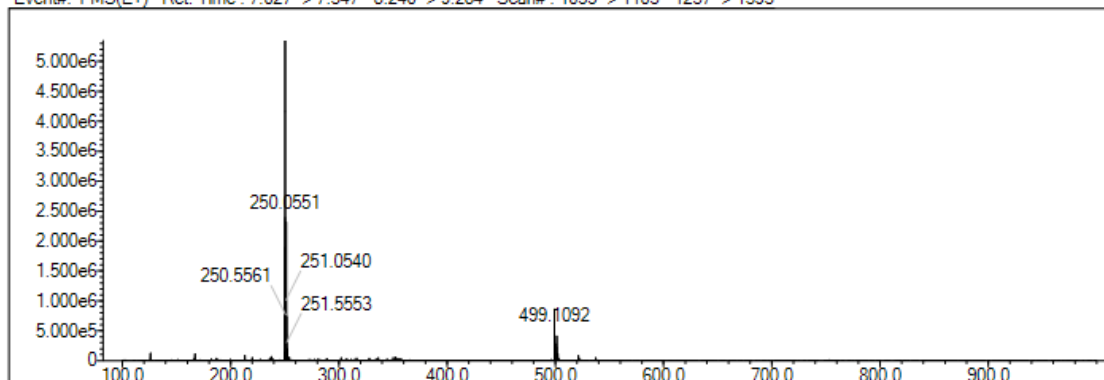

Measured region for 499.1092 m/z

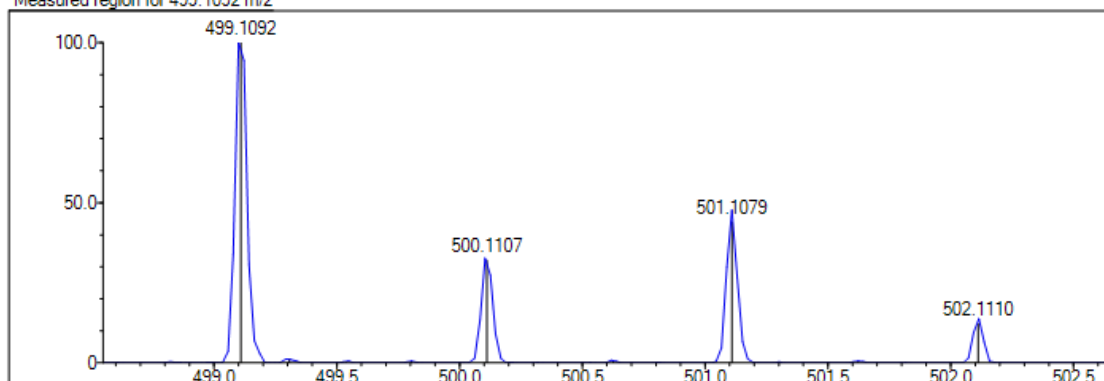

C26 H19 N6 O S Cl [M+H]+ : Predicted region for 499.1102 m/z

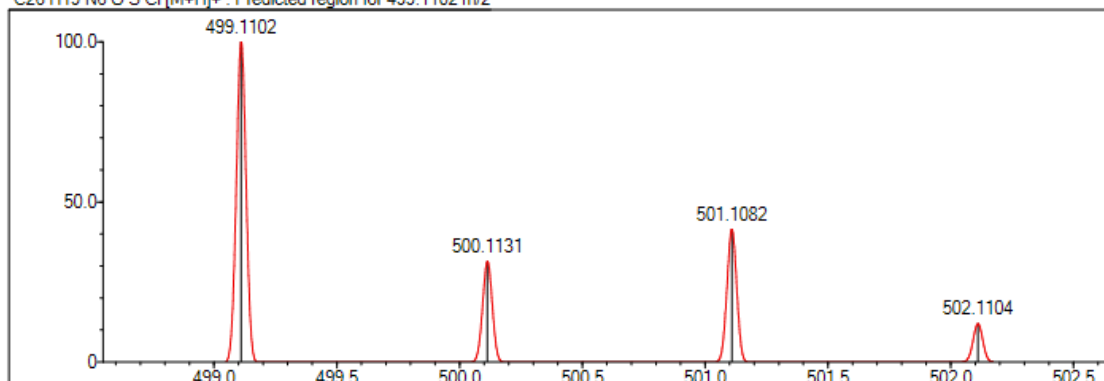

| Rank | Score | Formula (M)       | Ion    | Meas. m/z | Pred. m/z | Df. (mDa) | Df. (ppm) | Iso   | DBE  |
|------|-------|-------------------|--------|-----------|-----------|-----------|-----------|-------|------|
| 1    | 86.52 | C26 H19 N6 O S Cl | [M+H]+ | 499.1092  | 499.1102  | -1.0      | -2.00     | 88.74 | 20.0 |



2-(4-(4-Ethyl-5-(2-(4-bromophenyl)-2-oxo-ethylthio)-4H-1,2,4-triazol-3yl)-phenyl)-5(6)-chloro-1H-benzimidazole (3f)

<sup>1</sup>H, TU-34, DMSO, 298K

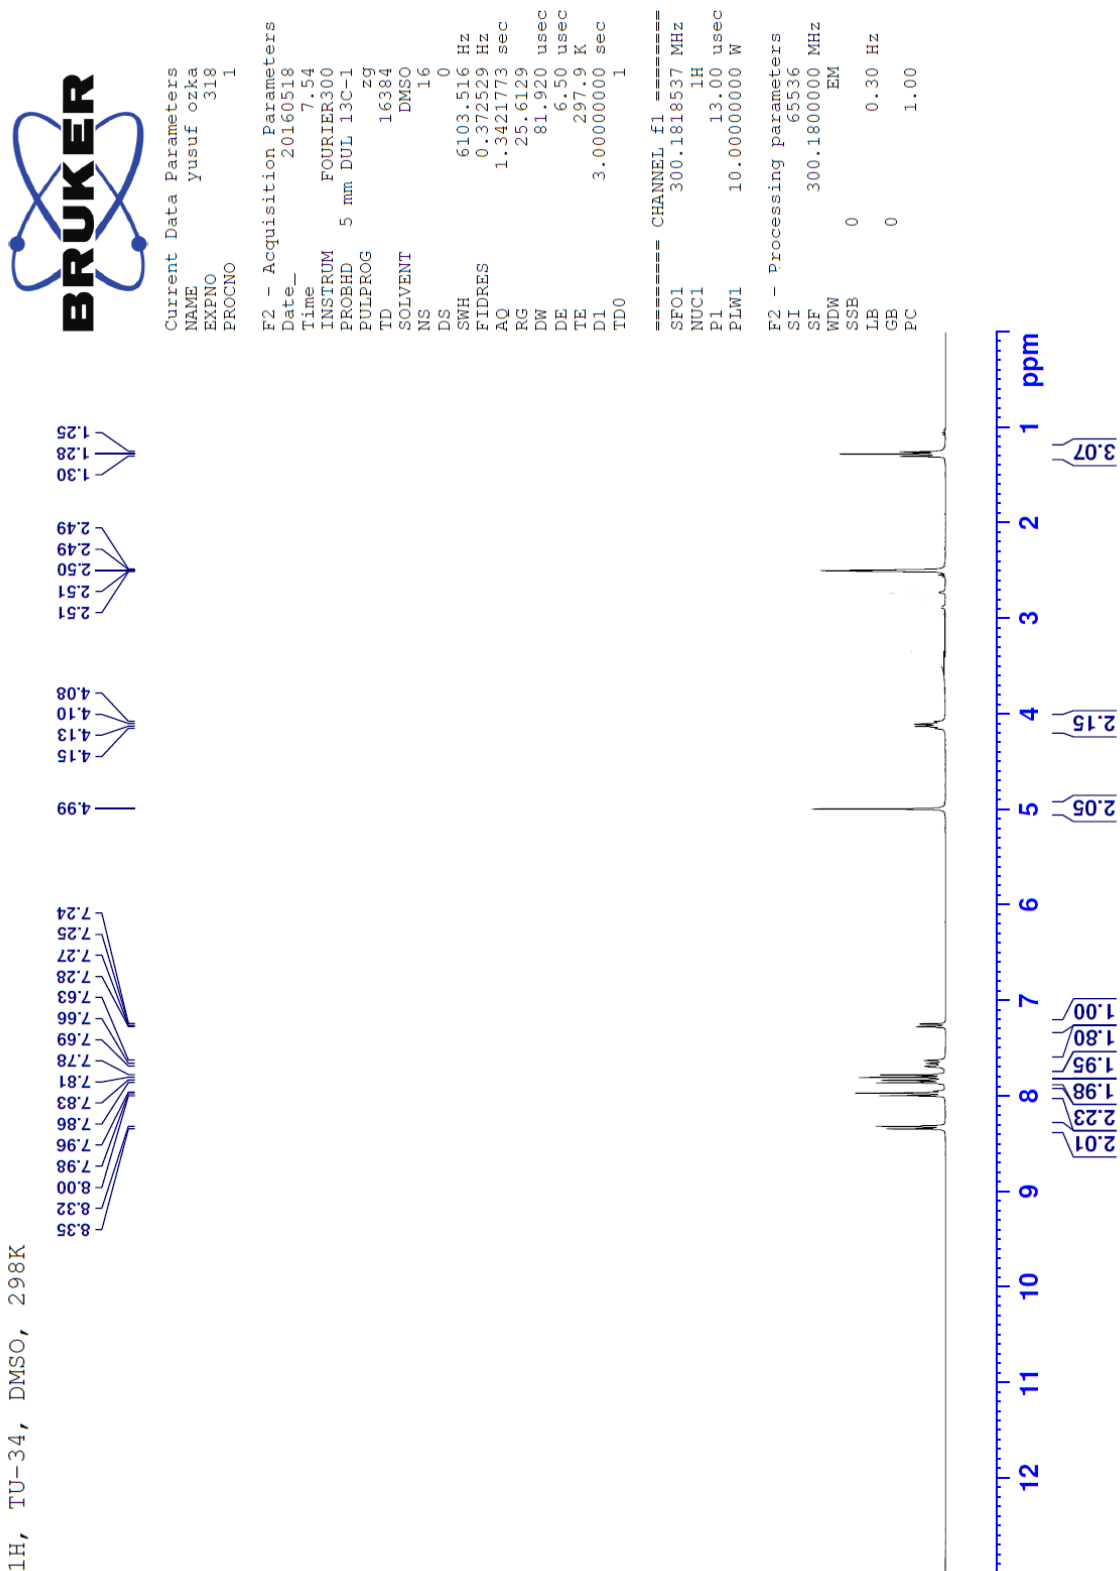

13C, TU-34, DMSO, 298K

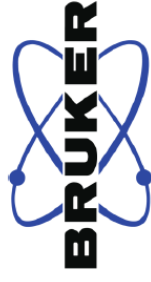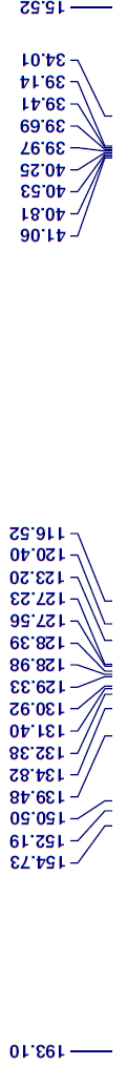

Current Data Parameters  
NAME yusuf ozka  
EXPNO 319  
PROCNO 1

F2 - Acquisition Parameters  
Date\_ 20160518  
Time 7.56  
INSTRUM FOURIER300  
PROBHD 5 mm DUL 13C-1  
PULPROG zgpg  
TD 32768  
SOLVENT DMSO  
NS 2048  
DS 4  
SWH 24414.063 Hz  
FIDRES 0.745058 Hz  
AQ 0.6710886 sec  
RG 501.187  
DW 20.480 usec  
DE 6.50 usec  
TE 298.0 K  
D1 1.00000000 sec  
D11 0.03000000 sec  
D31 0.00001500 sec  
D32 0.89999998 sec  
D40 0.00093990 sec  
L4 23  
L5 26  
F32 90.00 usec  
TD0 1

==== CHANNEL f1 =====  
SFO1 75.4878687 MHz  
NUC1 13C  
P1 15.00 usec  
PLW1 15.00000000 W

==== CHANNEL f2 =====  
SFO2 300.1812007 MHz  
NUC2 1H  
CPDPRG[2] waltz16  
PCPD2 90.00 usec  
PLW2 10.00000000 W  
PLW12 0.20863999 W  
PLW13 0.10495000 W

F2 - Processing parameters  
SI 32768  
SF 75.4803210 MHz  
WDW EM  
SSB 0  
LB 1.00 Hz  
GB 0  
PC 1.40

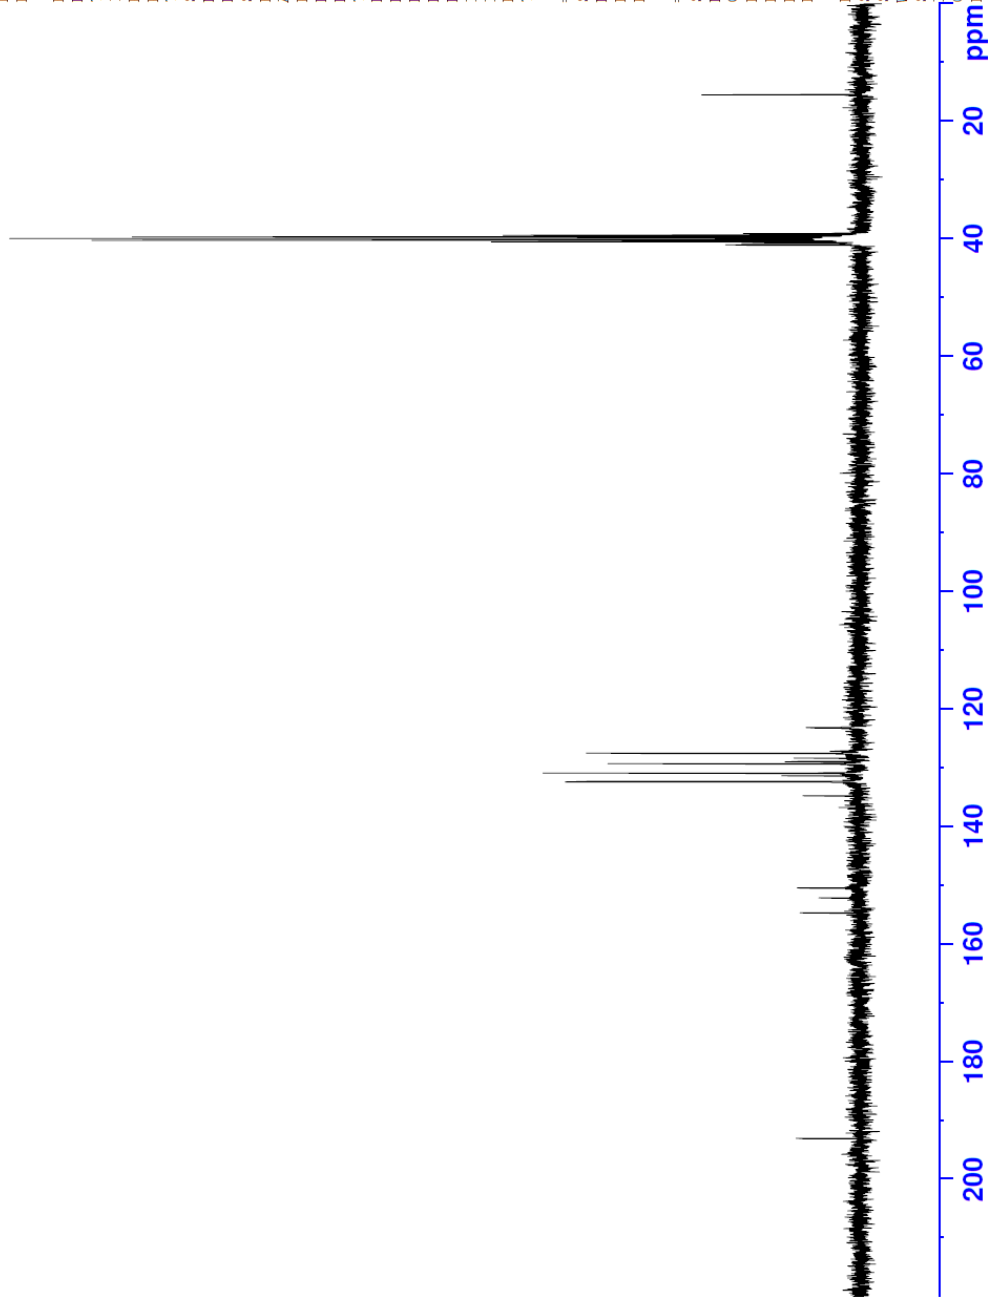

Data File: C:\LabSolutions\Data\Analiz\aac\TU-34\_48.lcd

| Elmt | Val | Min | Max | Elmt | Val | Min | Max | Elmt | Val | Min | Max | Elmt | Val | Min | Max | Use Adduct |
|------|-----|-----|-----|------|-----|-----|-----|------|-----|-----|-----|------|-----|-----|-----|------------|
| H    | 1   | 9   | 40  | O    | 2   | 1   | 1   | S    | 2   | 0   | 2   | Ru   | 2   | 0   | 0   | H          |
| C    | 4   | 11  | 26  | F    | 1   | 0   | 0   | Cl   | 1   | 0   | 1   | I    | 3   | 0   | 0   |            |
| N    | 3   | 0   | 6   | P    | 3   | 0   | 0   | Br   | 1   | 0   | 1   |      |     |     |     |            |

Error Margin (ppm): 5

HC Ratio: unlimited

Max Isotopes: 3

MSn Iso RI (%): 10.00

DBE Range: 17.0 - 20.0

Apply N Rule: yes

Isotope RI (%): 1.00

MSn Logic Mode: AND

Electron Ions: both

Use MSn Info: no

Isotope Res: 10000

Max Results: 500

Event#: 1 MS(E+) Ret. Time : 7.480 -&gt; 7.680 - 8.040 -&gt; 9.784 Scan#: 1123 -&gt; 1153 - 1207 -&gt; 1469

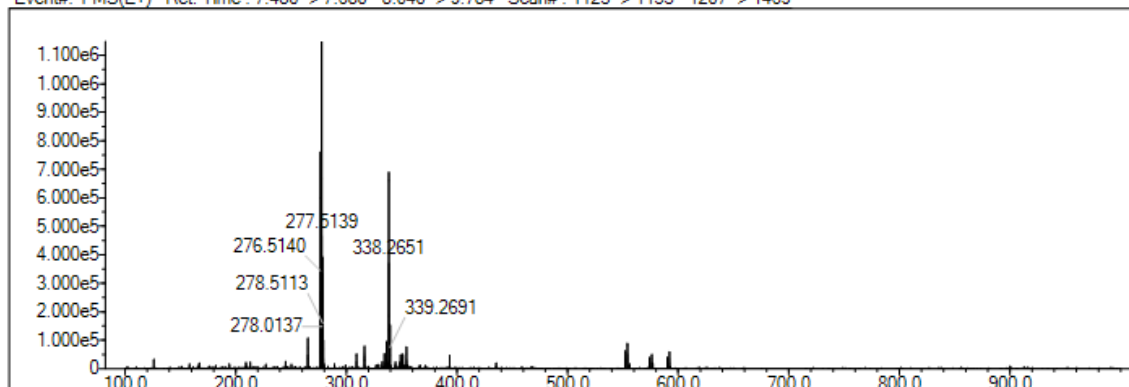

Measured region for 552.0249 m/z

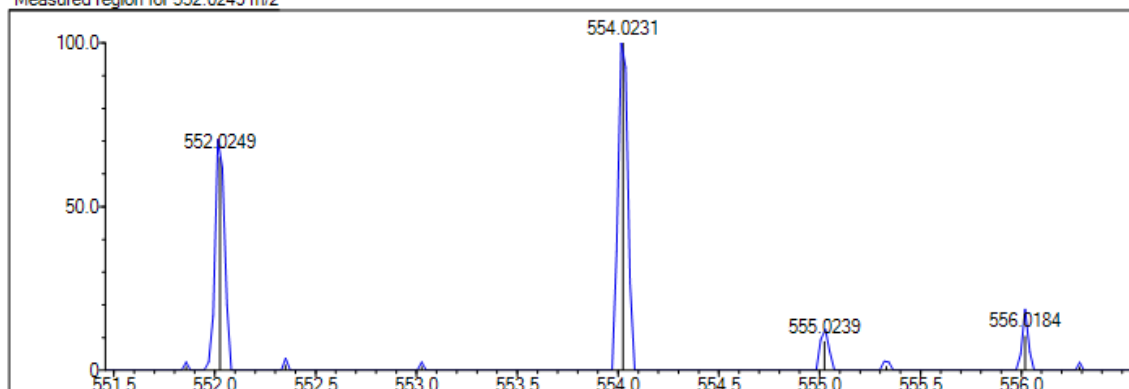

C25 H19 N5 O S Cl Br [M+H]+ : Predicted region for 552.0255 m/z

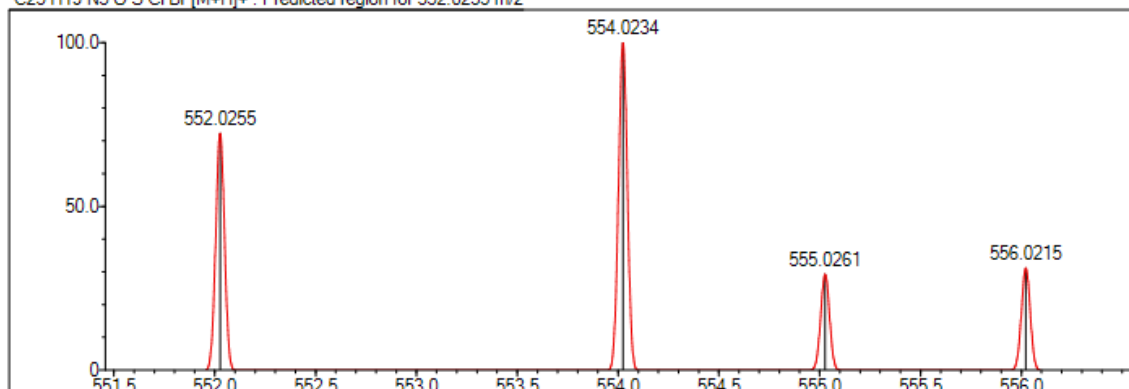

| Rank | Score | Formula (M)          | Ion    | Meas. m/z | Pred. m/z | Df. (mDa) | Df. (ppm) | Iso   | DBE  |
|------|-------|----------------------|--------|-----------|-----------|-----------|-----------|-------|------|
| 1    | 54.11 | C25 H19 N5 O S Cl Br | [M+H]+ | 552.0249  | 552.0255  | -0.6      | -1.09     | 54.23 | 18.0 |

2-(4-(4-Ethyl-5-(2-(4-methylphenyl)-2-oxo-ethylthio)-4H-1,2,4-triazol-3-yl)-phenyl)-5(6)-chloro-1H-benzimidazole (3g)

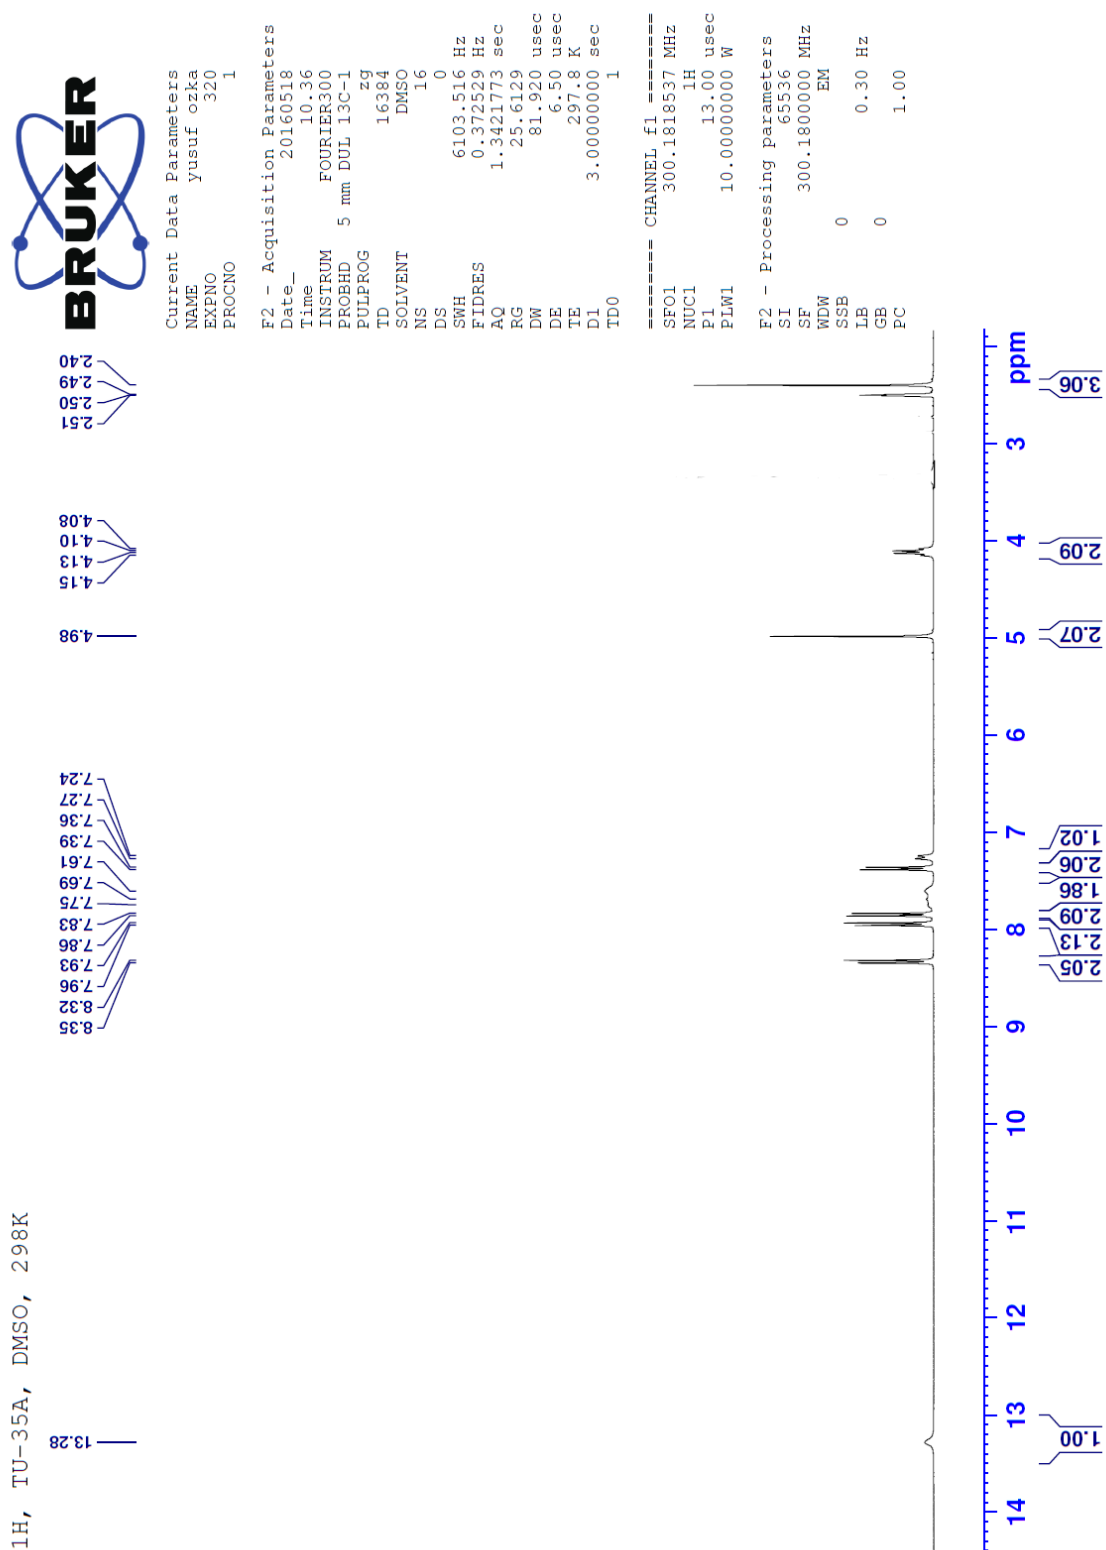

13C, TU-35A, DMSO, 298K

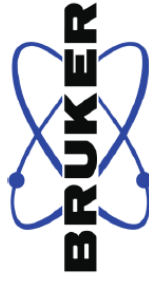

154.69  
150.66  
144.79  
133.27  
132.59  
131.43  
130.59  
129.85  
129.32  
129.03  
128.43  
127.54  
123.48  
118.98  
113.31  
111.68

41.22  
40.80  
40.53  
40.25  
39.97  
39.69  
39.42  
39.14  
33.58  
21.68  
15.53

Current Data Parameters  
NAME yusuf ozka  
EXPNO 321  
PROCNO 1

F2 - Acquisition Parameters  
Date\_ 20160518  
Time 10.38  
INSTRUM FOURIER300  
PROBHD 5 mm DUL 13C-1  
PULPROG zgpg  
TD 32768  
SOLVENT DMSO  
NS 2048  
DS 4  
SWH 24414.063 Hz  
FIDRES 0.745058 Hz  
AQ 0.6710886 sec  
RG 501.187  
DW 20.480 usec  
DE 6.50 usec  
TE 297.9 K  
D1 1.00000000 sec  
D11 0.03000000 sec  
D31 0.00001500 sec  
D32 0.89999998 sec  
D40 0.00093990 sec  
L4 23  
L5 26  
P32 90.00 usec  
TD0 1

===== CHANNEL f1 =====  
SFO1 75.4878687 MHz  
NUC1 13C  
P1 15.00 usec  
PLW1 15.0000000 W

===== CHANNEL f2 =====  
SFO2 300.1812007 MHz  
NUC2 1H  
CPDPRG[2] waltz16  
PCPD2 90.00 usec  
PLW2 10.0000000 W  
PLW12 0.20863999 W  
PLW13 0.10495000 W

F2 - Processing parameters  
SI 32768  
SF 75.4803210 MHz  
WDW EM  
SSB 0  
LB 0  
GB 1.00 Hz  
PC 1.40

200 180 160 140 120 100 80 60 40 20 ppm

Data File: C:\LabSolutions\Data\Analiz\luac\TU-35A\_49.lcd

| Elmt | Val. | Min | Max | Elmt | Val. | Min | Max | Elmt | Val. | Min | Max | Elmt | Val. | Min | Max | Use Adduct |
|------|------|-----|-----|------|------|-----|-----|------|------|-----|-----|------|------|-----|-----|------------|
| H    | 1    | 9   | 40  | O    | 2    | 1   | 1   | S    | 2    | 0   | 2   | Ru   | 2    | 0   | 0   | H          |
| C    | 4    | 11  | 26  | F    | 1    | 0   | 0   | Cl   | 1    | 0   | 1   | I    | 3    | 0   | 0   |            |
| N    | 3    | 0   | 6   | P    | 3    | 0   | 0   | Br   | 1    | 0   | 1   |      |      |     |     |            |

Error Margin (ppm): 5

HC Ratio: unlimited

Max Isotopes: 3

MSn Iso RI (%): 10.00

DBE Range: 17.0 - 20.0

Apply N Rule: yes

Isotope RI (%): 1.00

MSn Logic Mode: AND

Electron Ions: both

Use MSn Info: no

Isotope Res: 10000

Max Results: 500

Event#: 1 MS(E+) Ret. Time : 8.707 -&gt; 8.787 - 8.947 -&gt; 10.345 Scan#: 1307 -&gt; 1319 - 1343 -&gt; 1553

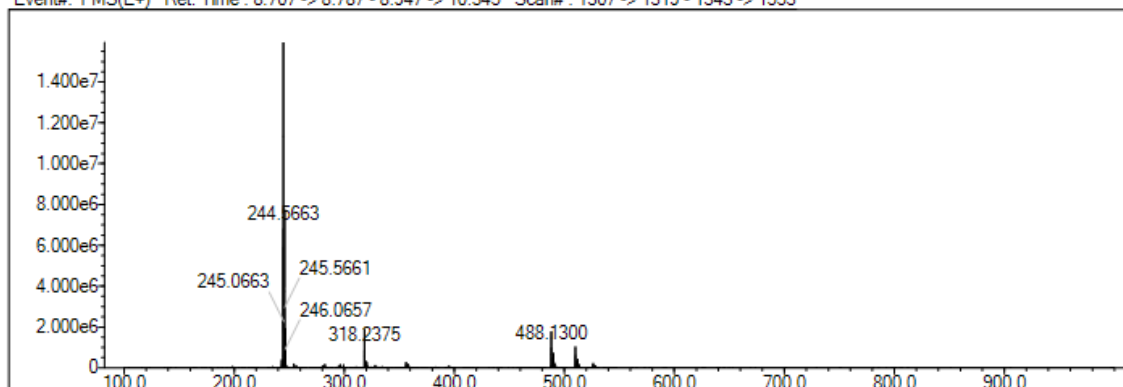

Measured region for 488.1300 m/z

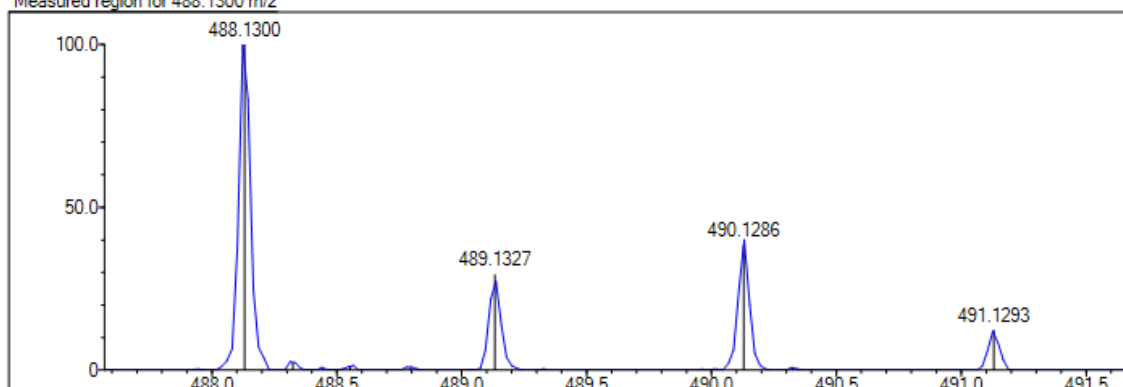C26 H22 N5 O S Cl [M+H]<sup>+</sup> : Predicted region for 488.1306 m/z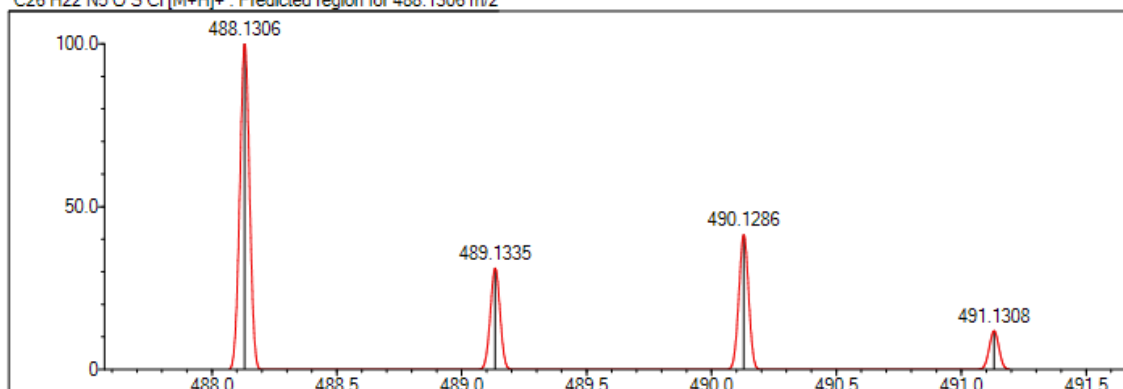

| Rank | Score | Formula (M)       | Ion                | Meas. m/z | Pred. m/z | Df. (mDa) | Df. (ppm) | Iso   | DBE  |
|------|-------|-------------------|--------------------|-----------|-----------|-----------|-----------|-------|------|
| 1    | 84.40 | C26 H22 N5 O S Cl | [M+H] <sup>+</sup> | 488.1300  | 488.1306  | -0.6      | -1.23     | 84.89 | 18.0 |

2-(4-(4-Ethyl-5-(2-(3,4-dihydroxyphenyl)-2-oxo-ethylthio)-4H-1,2,4-triazol-3yl)-phenyl)-5(6)-chloro-1H- benzimidazole (3h)

<sup>1</sup>H, TU-39, DMSO, 298K

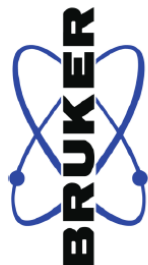

Current Data Parameters  
NAME yusuf ozka  
EXPNO 328  
PROCNO 1

F2 - Acquisition Parameters  
Date\_ 20160518  
Time 15.47  
INSTRUM FOURIER300  
PROBHD 5 mm DUL 13C-1  
PULPROG zg  
TD 16384  
SOLVENT DMSO  
NS 16  
DS 0  
SWH 6103.516 Hz  
FIDRES 0.372529 Hz  
AQ 1.3421773 sec  
RG 12.6031  
DW 81.920 usec  
DE 6.50 usec  
TE 297.9 K  
D1 3.00000000 sec  
TD0 1

===== CHANNEL f1 =====  
SF01 300.1818537 MHz  
NUC1 1H  
P1 13.00 usec  
PLW1 10.00000000 W

F2 - Processing parameters  
SI 65536  
SF 300.1800000 MHz  
WDW EM  
SSB 0  
LB 0.30 Hz  
GB 0  
PC 1.00

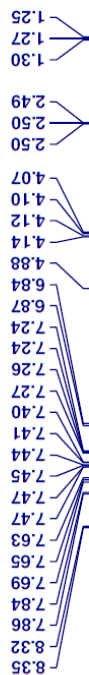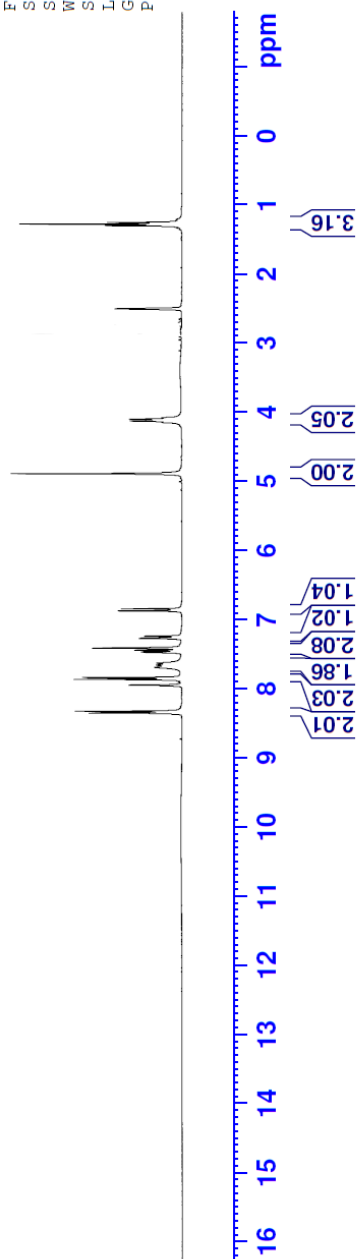

<sup>13</sup>C, TU-39, DMSO, 298K

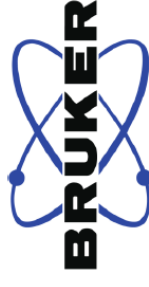

15.53  
36.24  
39.13  
39.41  
39.69  
39.96  
40.24  
40.52  
40.80  
41.08

191.71  
162.75  
154.66  
152.23  
151.93  
150.85  
145.86  
133.31  
131.43  
129.31  
129.03  
128.29  
127.55  
125.42  
123.17  
122.49  
120.97  
118.96  
115.66  
111.36

Current Data Parameters  
NAME yusuf ozka  
EXPNO 329  
PROCNO 1

F2 - Acquisition Parameters  
Date\_ 20160518  
Time 15.49  
INSTRUM FOURIER300  
PROBHD 5 mm DUL 13C-1  
PULPROG zgpg  
TD 32768  
SOLVENT DMSO  
NS 2048  
DS 4  
SWH 24414.063 Hz  
FIDRES 0.745058 Hz  
AQ 0.6710886 sec  
RG 501.187  
DM 20.480 usec  
DE 6.50 usec  
TE 297.9 K  
D1 1.00000000 sec  
D11 0.03000000 sec  
D31 0.00015000 sec  
D32 0.89999998 sec  
D40 0.00093990 sec  
L4 23  
L5 26  
P32 90.00 usec  
TD0 1

==== CHANNEL f1 =====  
SFO1 75.4878687 MHz  
NUC1 13C  
P1 15.00 usec  
PLW1 15.0000000 W

==== CHANNEL f2 =====  
SFO2 300.1812007 MHz  
NUC2 1H  
CPDPRG2 waltz16  
PCPD2 90.00 usec  
PLW2 10.00000000 W  
PLW12 0.20863999 W  
PLW13 0.10495000 W

F2 - Processing parameters  
SI 32768  
SF 75.4803210 MHz  
WDW EM  
SSB 0  
LB 1.00 Hz  
GB 0  
PC 1.40

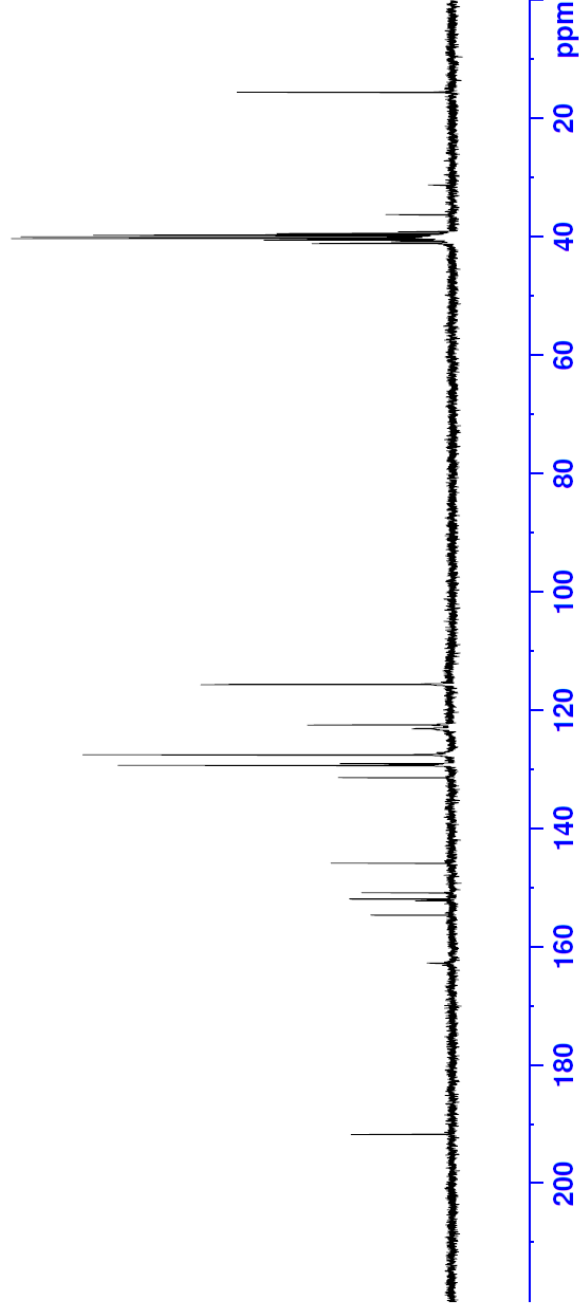



Data File: C:\LabSolutions\Data\Analiz\aac\TU-39\_56.lcd

| Elmt | Val. | Min | Max | Elmt | Val. | Min | Max | Elmt | Val. | Min | Max | Elmt | Val. | Min | Max | Use Adduct |
|------|------|-----|-----|------|------|-----|-----|------|------|-----|-----|------|------|-----|-----|------------|
| H    | 1    | 9   | 40  | O    | 2    | 1   | 3   | S    | 2    | 0   | 2   | Ru   | 2    | 0   | 0   | H          |
| C    | 4    | 11  | 26  | F    | 1    | 0   | 0   | Cl   | 1    | 0   | 1   | I    | 3    | 0   | 0   |            |
| N    | 3    | 0   | 6   | P    | 3    | 0   | 0   | Br   | 1    | 0   | 1   |      |      |     |     |            |

Error Margin (ppm): 5  
 HC Ratio: unlimited  
 Max Isotopes: 3  
 MSn Iso RI (%): 10.00

DBE Range: 17.0 - 20.0  
 Apply N Rule: yes  
 Isotope RI (%): 1.00  
 MSn Logic Mode: AND

Electron Ions: both  
 Use MSn Info: no  
 Isotope Res: 10000  
 Max Results: 500

Event#: 1 MS(E+) Ret. Time : 6.333 -&gt; 6.867 - 7.680 -&gt; 9.066 Scan#: 951 -&gt; 1031 - 1153 -&gt; 1361

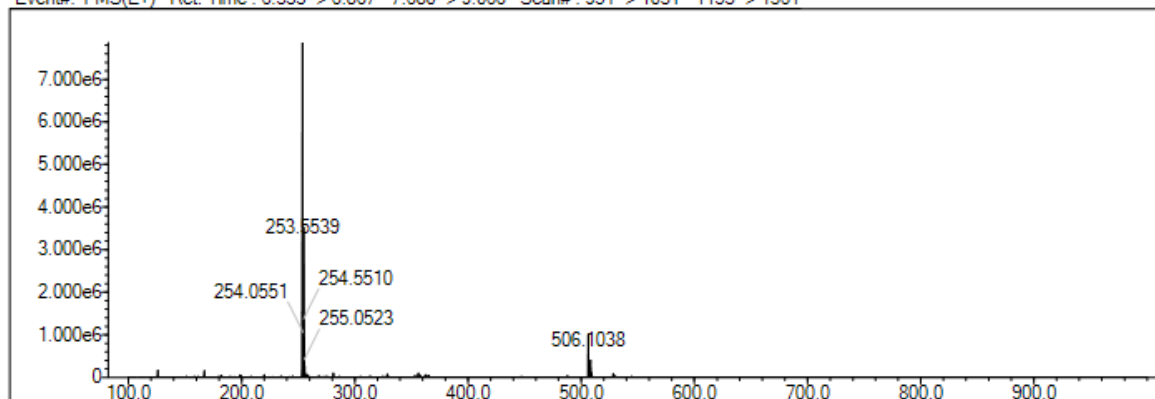

Measured region for 506.1038 m/z

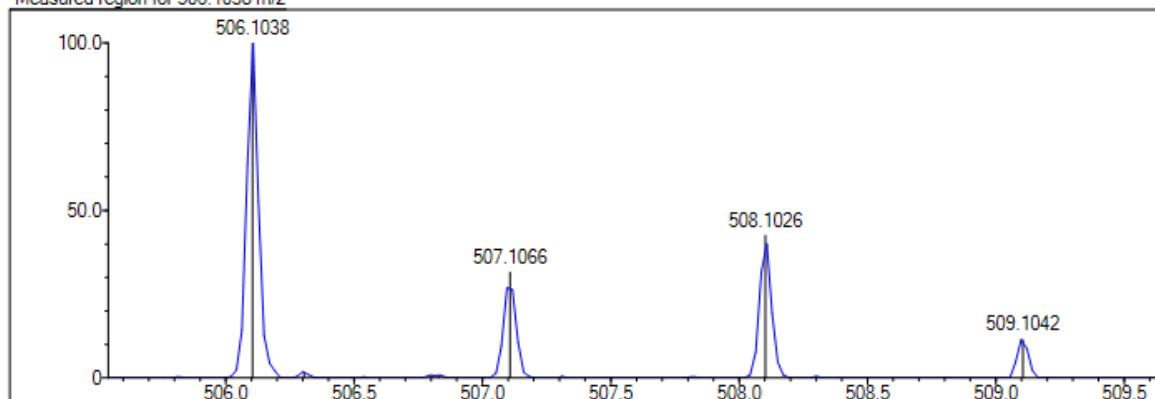C25 H20 N5 O3 S Cl [M+H]<sup>+</sup> : Predicted region for 506.1048 m/z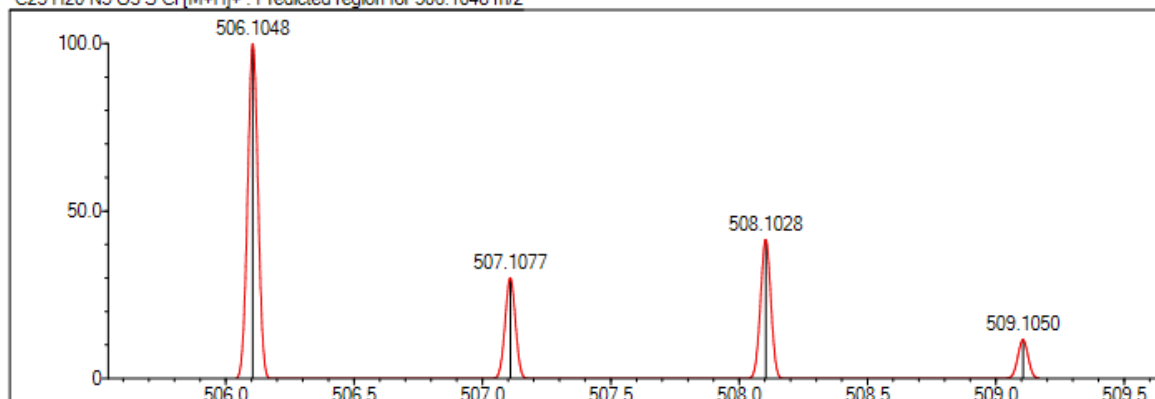

| Rank | Score | Formula (M)        | Ion                | Meas. m/z | Pred. m/z | Df. (mDa) | Df. (ppm) | Iso   | DBE  |
|------|-------|--------------------|--------------------|-----------|-----------|-----------|-----------|-------|------|
| 1    | 93.72 | C25 H20 N5 O3 S Cl | [M+H] <sup>+</sup> | 506.1038  | 506.1048  | -1.0      | -1.98     | 96.08 | 18.0 |

2-(4-(4-Methyl-5-(2-(4-cyanophenyl)-2-oxo-ethylthio)-4H-1,2,4-triazol-3yl)-phenyl)-5(6)-fluoro-1H-benzoimidazole (3i)

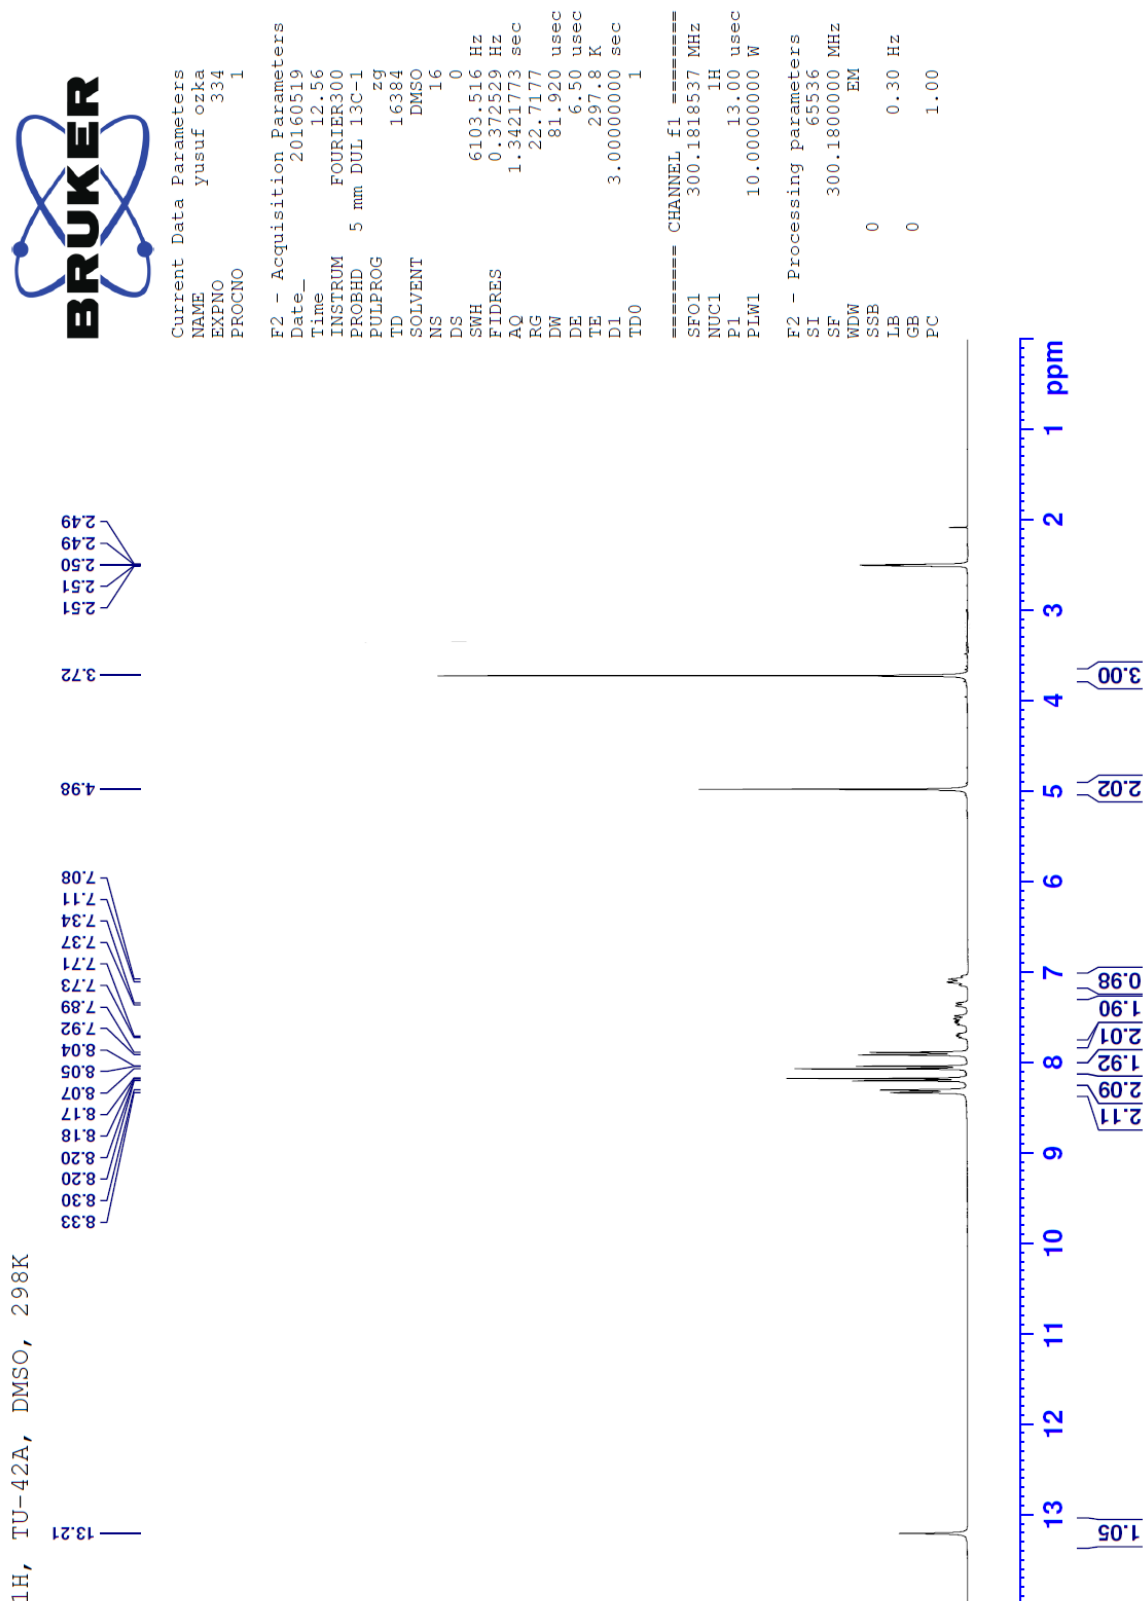

<sup>13</sup>C, TU-42A, DMSO, 298K

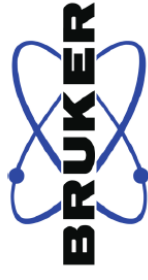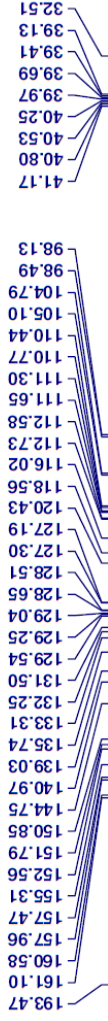

Current Data Parameters  
NAME yusuf ozka  
EXPNO 335  
PROCNO 1

F2 - Acquisition Parameters  
Date\_ 20160519  
Time 12.58  
INSTRUM FOURIER300  
PROBHD 5 mm DUL 13C-1  
PULPROG zgpg  
TD 32768  
SOLVENT DMSO  
NS 2048  
DS 4  
SWH 24414.063 Hz  
FIDRES 0.745058 Hz  
AQ 0.6710886 sec  
RG 501.187  
DW 20.480 usec  
DE 6.50 usec  
TE 298.0 K  
D1 1.00000000 sec  
D11 0.03000000 sec  
D31 0.00001500 sec  
D32 0.89999998 sec  
D40 0.00093990 sec  
L4 23  
L5 26  
P32 90.00 usec  
TD0 1

===== CHANNEL f1 =====  
SFO1 75.4878687 MHz  
NUC1 13C  
P1 15.00 usec  
PLW1 15.00000000 W

===== CHANNEL f2 =====  
SFO2 300.1812007 MHz  
NUC2 1H  
PCPD2 waltz16  
PLW2 90.00 usec  
PLW12 10.00000000 W  
PLW13 0.20863999 W  
PLW13 0.10495000 W

F2 - Processing parameters  
SI 32768  
SF 75.4803210 MHz  
WDW EM  
SSB 0  
LB 0  
GB 0  
PC 1.40

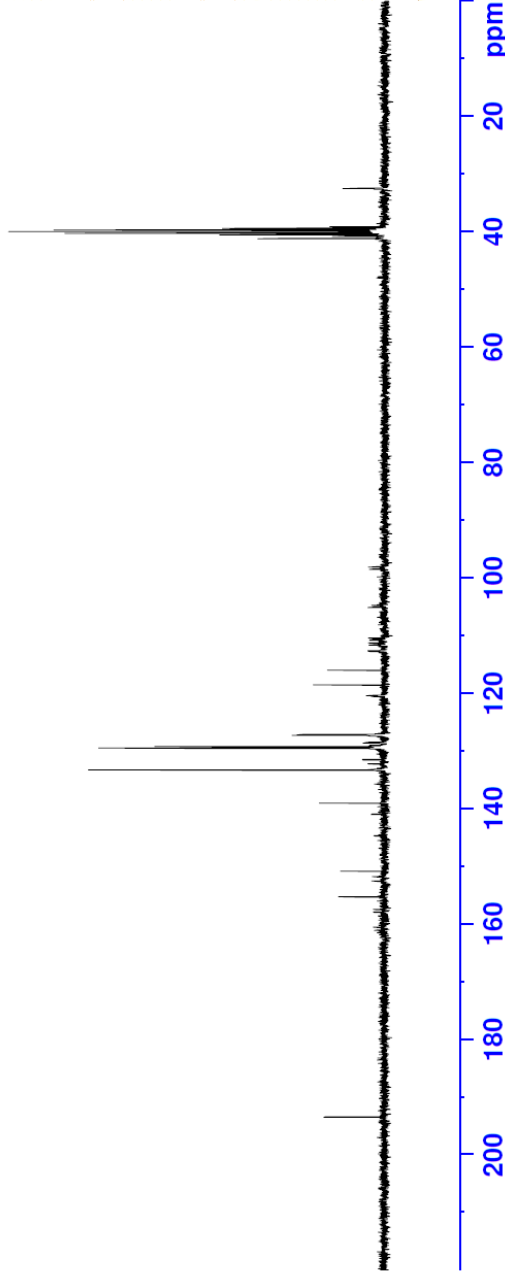

Data File: C:\LabSolutions\Data\Analiz\luac\TU-42A\_59.lcd

| Elmt | Val. | Min | Max | Elmt | Val. | Min | Max | Elmt | Val. | Min | Max | Elmt | Val. | Min | Max | Use Adduct |
|------|------|-----|-----|------|------|-----|-----|------|------|-----|-----|------|------|-----|-----|------------|
| H    | 1    | 9   | 40  | O    | 2    | 1   | 3   | S    | 2    | 0   | 2   | Ru   | 2    | 0   | 0   | H          |
| C    | 4    | 11  | 26  | F    | 1    | 0   | 1   | Cl   | 1    | 0   | 1   | I    | 3    | 0   | 0   |            |
| N    | 3    | 0   | 6   | P    | 3    | 0   | 0   | Br   | 1    | 0   | 1   |      |      |     |     |            |

Error Margin (ppm): 5

HC Ratio: unlimited

Max Isotopes: 3

MSn Iso RI (%): 10.00

DBE Range: 17.0 - 20.0

Apply N Rule: yes

Isotope RI (%): 1.00

MSn Logic Mode: AND

Electron Ions: both

Use MSn Info: no

Isotope Res: 10000

Max Results: 500

Event#: 1 MS(E+) Ret. Time: 6.400 -&gt; 6.840 - 7.720 -&gt; 9.087 Scan#: 961 -&gt; 1027 - 1159 -&gt; 1365

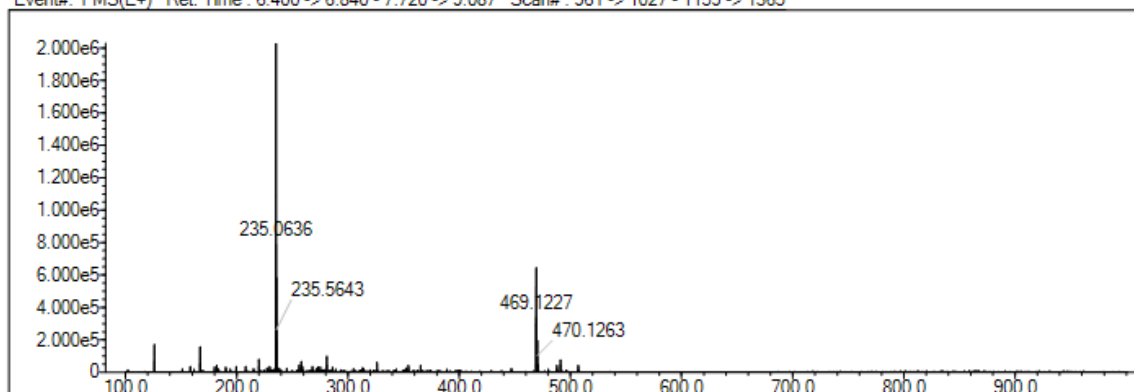

Measured region for 469.1227 m/z

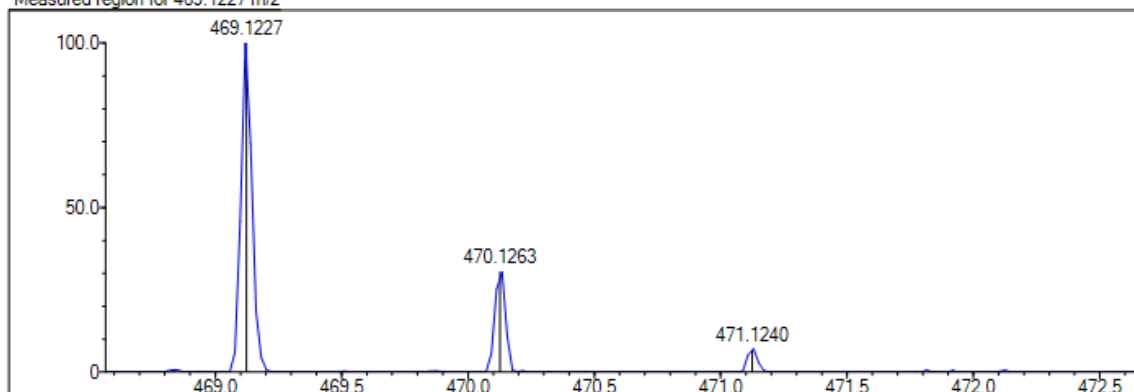C25 H17 N6 O F S [M+H]<sup>+</sup>: Predicted region for 469.1241 m/z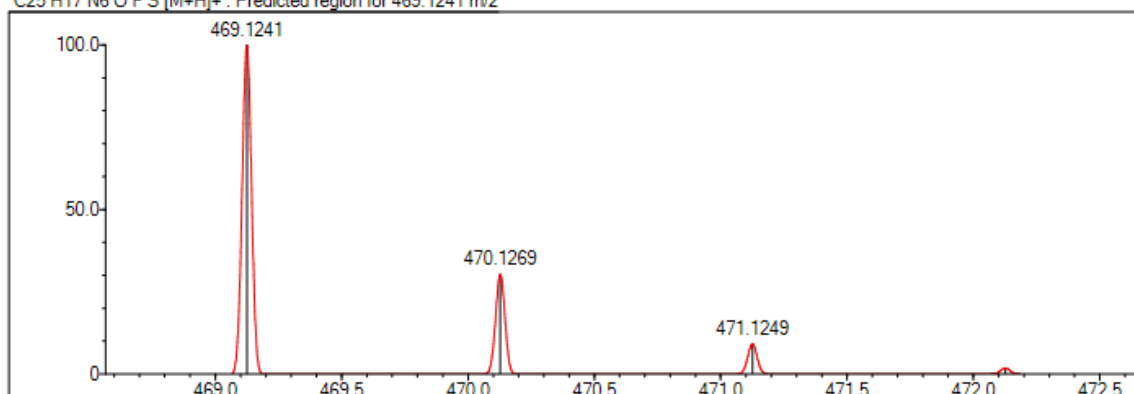

| Rank | Score | Formula (M)      | Ion                | Meas. m/z | Pred. m/z | Df. (mDa) | Df. (ppm) | Iso   | DBE  |
|------|-------|------------------|--------------------|-----------|-----------|-----------|-----------|-------|------|
| 1    | 73.31 | C25 H17 N6 O F S | [M+H] <sup>+</sup> | 469.1227  | 469.1241  | -1.4      | -2.98     | 77.13 | 20.0 |

2-(4-(4-Methyl-5-(2-(4-bromophenyl)-2-oxo-ethylthio)-4H-1,2,4-triazol-3-yl)-phenyl)-5(6)-fluoro-1H-benzimidazole (3j)

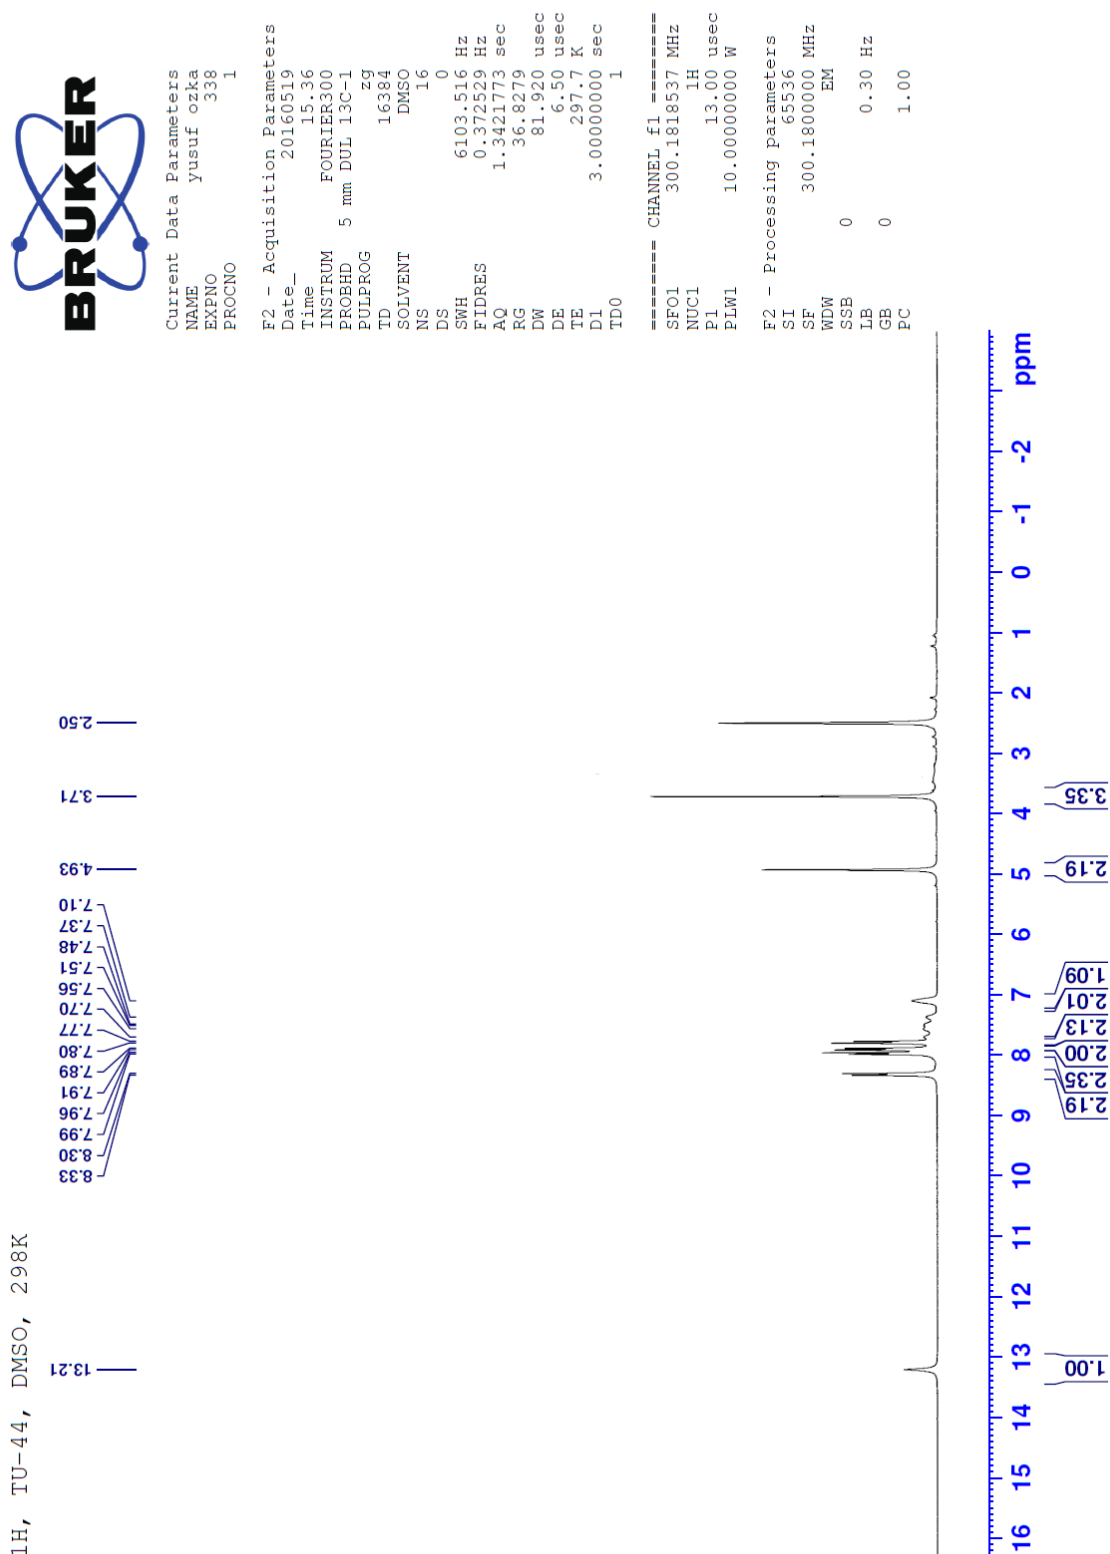

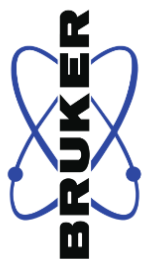

13C, TU-44, DMSO, 298K

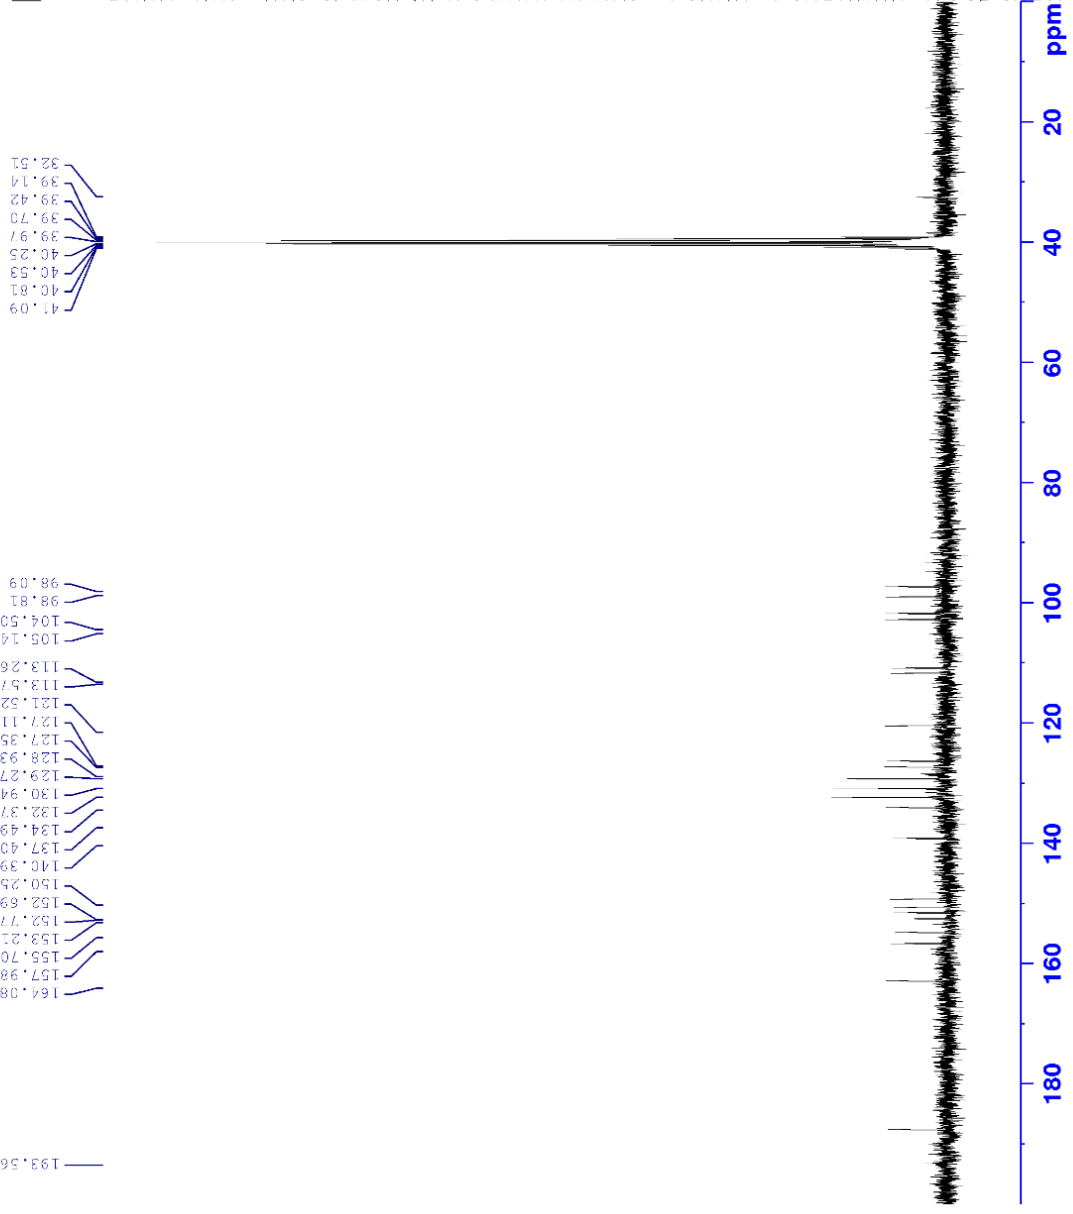

Current Data Parameters  
NAME Yusuf Ozkay  
EXPNO 339  
PROCNO 1

F2 - Acquisition Parameters  
Date\_ 20160519  
Time 15.38  
INSTRUM FOURIER300  
PROBHD 5 mm DUL 13C-1  
PULPROG zgpg  
TD 32768  
SOLVENT DMSO  
NS 2048  
DS 4  
SWH 24414.063 Hz  
FIDRES 0.745058 Hz  
AQ 0.6710886 sec  
RG 501.187  
DW 20.480 usec  
DE 6.50 usec  
TE 298.0 K  
D1 1.00000000 sec  
D11 0.03000000 sec  
D31 0.0001500 sec  
D32 0.89999998 sec  
D40 0.00093990 sec  
L4 23  
L5 26  
P32 90.00 usec  
TD0 1

CHANNEL f1  
SFO1 75.4878687 MHz  
NUC1 13C  
P1 15.00 usec  
PL1 15.0000000 W

CHANNEL f2  
SFO2 300.1812007 MHz  
NUC2 1H  
P2 15.00 usec  
PL2 15.0000000 W

WALTZ16  
PCPD2 90.00 usec  
P1W2 10.0000000 W  
P1W12 0.2086399 W  
P1W13 0.1049500 W

F2 - Processing parameters  
SI 32768  
SF 75.4803210 MHz  
WDW EM  
SSB 0  
GB 0  
PC 1.40

Data File: C:\LabSolutions\Data\Analiz\luc\TU-44A\_62.lcd

| Elmt | Val. | Min | Max | Elmt | Val. | Min | Max | Elmt | Val. | Min | Max | Elmt | Val. | Min | Max | Use Adduct |
|------|------|-----|-----|------|------|-----|-----|------|------|-----|-----|------|------|-----|-----|------------|
| H    | 1    | 9   | 40  | O    | 2    | 1   | 3   | S    | 2    | 0   | 2   | Ru   | 2    | 0   | 0   | H          |
| C    | 4    | 11  | 26  | F    | 1    | 0   | 1   | Cl   | 1    | 0   | 0   | I    | 3    | 0   | 0   |            |
| N    | 3    | 0   | 6   | P    | 3    | 0   | 0   | Br   | 1    | 0   | 1   |      |      |     |     |            |

Error Margin (ppm): 5

HC Ratio: unlimited

Max Isotopes: 3

MSn Iso RI (%): 10.00

DBE Range: 17.0 - 20.0

Apply N Rule: yes

Isotope RI (%): 1.00

MSn Logic Mode: AND

Electron Ions: both

Use MSn Info: no

Isotope Res: 10000

Max Results: 500

Event#: 1 MS(E+) Ret. Time: 7.067 -&gt; 7.440 - 9.747 -&gt; 10.615 Scan#: 1061 -&gt; 1117 - 1463 -&gt; 1593

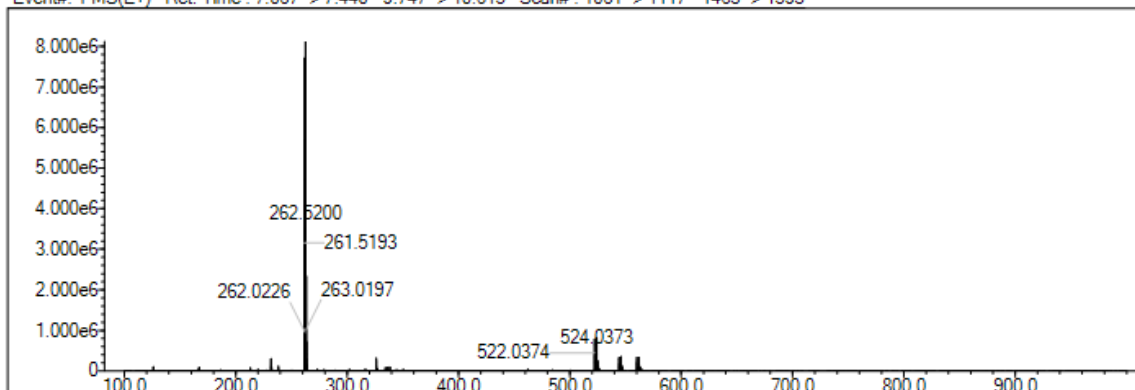

Measured region for 522.0374 m/z

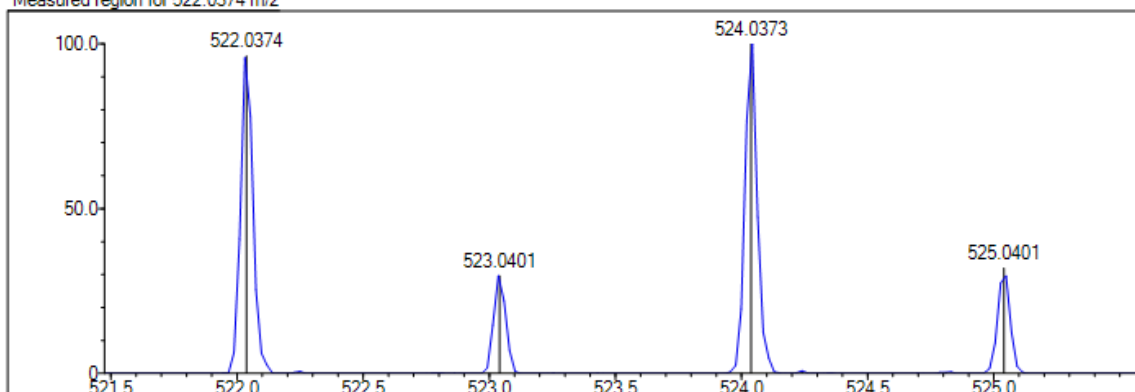

C24 H17 N5 O F S Br [M+H]+ : Predicted region for 522.0394 m/z

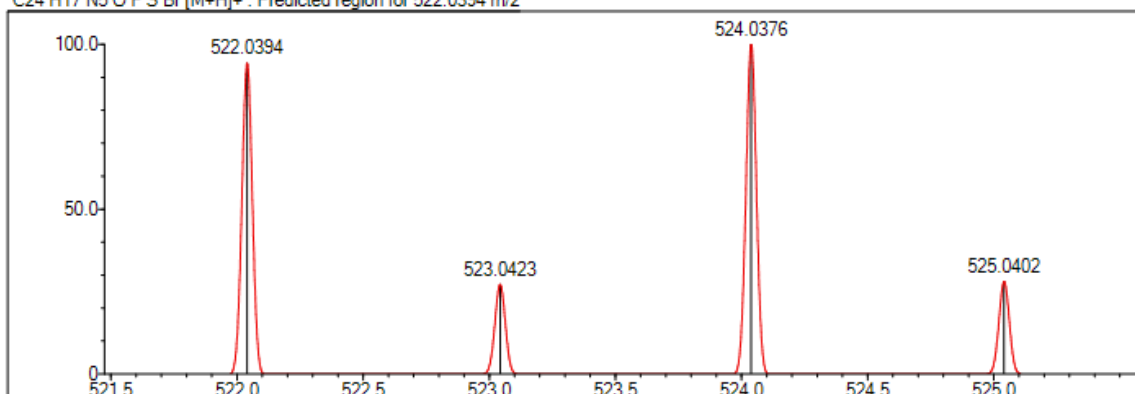

| Rank | Score | Formula (M)         | Ion    | Meas. m/z | Pred. m/z | Df. (mDa) | Df. (ppm) | Iso   | DBE  |
|------|-------|---------------------|--------|-----------|-----------|-----------|-----------|-------|------|
| 1    | 82.13 | C24 H17 N5 O F S Br | [M+H]+ | 522.0374  | 522.0394  | -2.0      | -3.83     | 88.38 | 18.0 |

2-(4-(4-Methyl-5-(2-(4-methylphenyl)-2-oxo-ethylthio)-4H-1,2,4-triazol-3-yl)-phenyl)-5(6)-fluoro-1H-benzimidazole (3k)

<sup>1</sup>H, TU-45A, DMSO, 298K

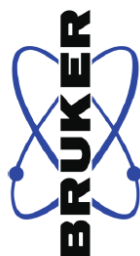

Current Data Parameters  
NAME yusuf ozka  
EXPNO 340  
PROCNO 1

F2 - Acquisition Parameters  
Date\_ 20160519  
Time 17.04  
INSTRUM FOURIER300  
PROBHD 5 mm DUL 13C-1  
PULPROG zg  
TD 16384  
SOLVENT DMSO  
NS 16  
DS 0  
SWH 6103.516 Hz  
FIDRES 0.372529 Hz  
AQ 1.3421773 sec  
RG 15.2457  
DW 81.920 usec  
DE 6.50 usec  
TE 297.7 K  
D1 3.00000000 sec  
TD0 1

===== CHANNEL f1 =====  
SFO1 300.1818537 MHz  
NUC1 1H  
P1 13.00 usec  
PLW1 10.00000000 W

F2 - Processing parameters  
SI 65536  
SF 300.1800000 MHz  
WDW EM  
SSB 0  
LB 0.30 Hz  
GB 0  
PC 1.00

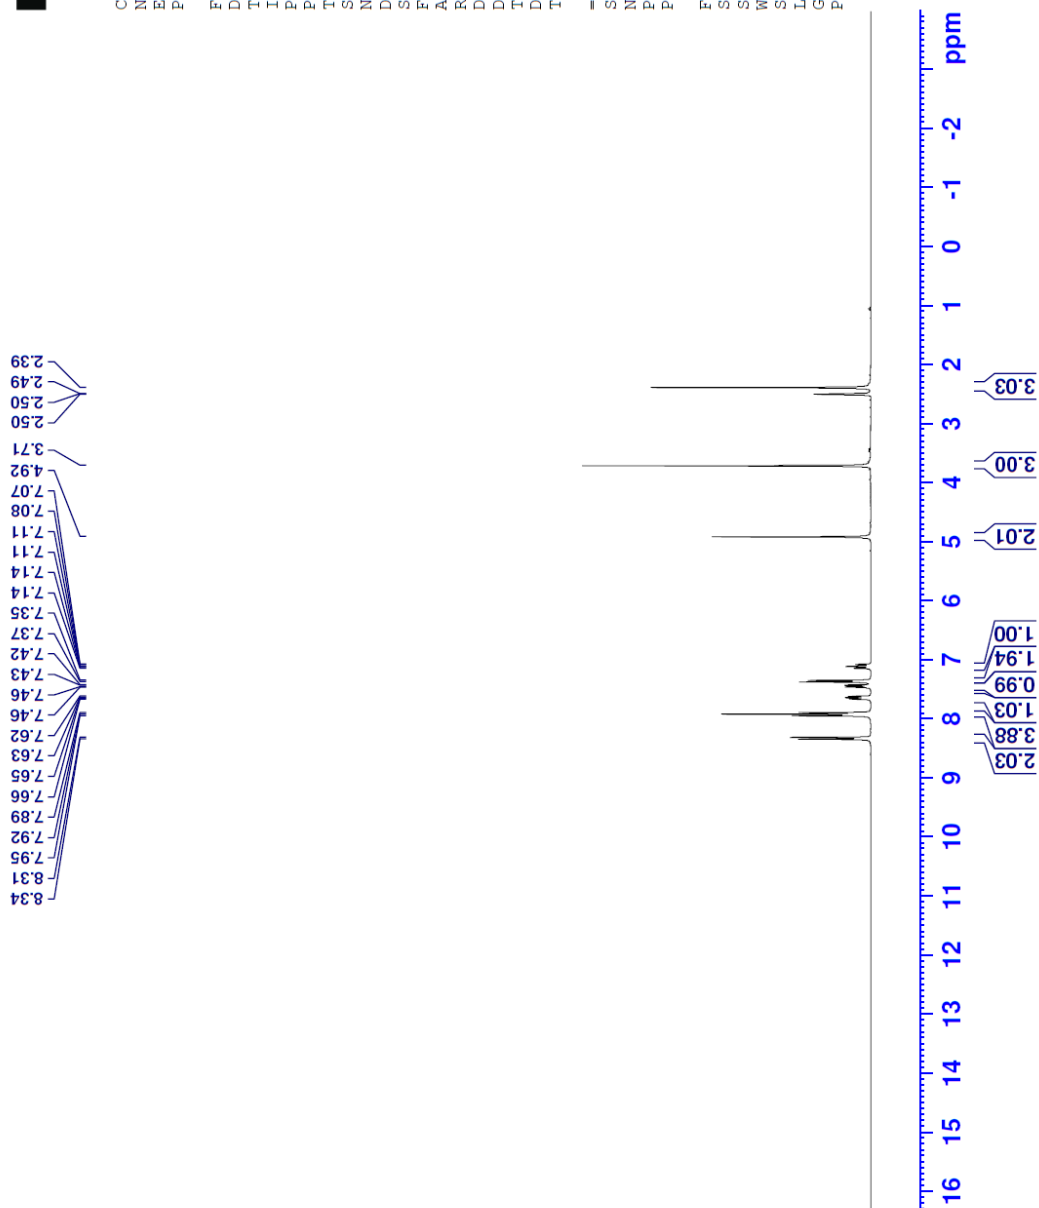



13C, TU-45A, DMSO, 298K

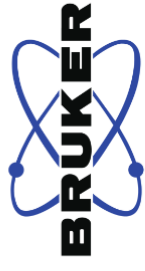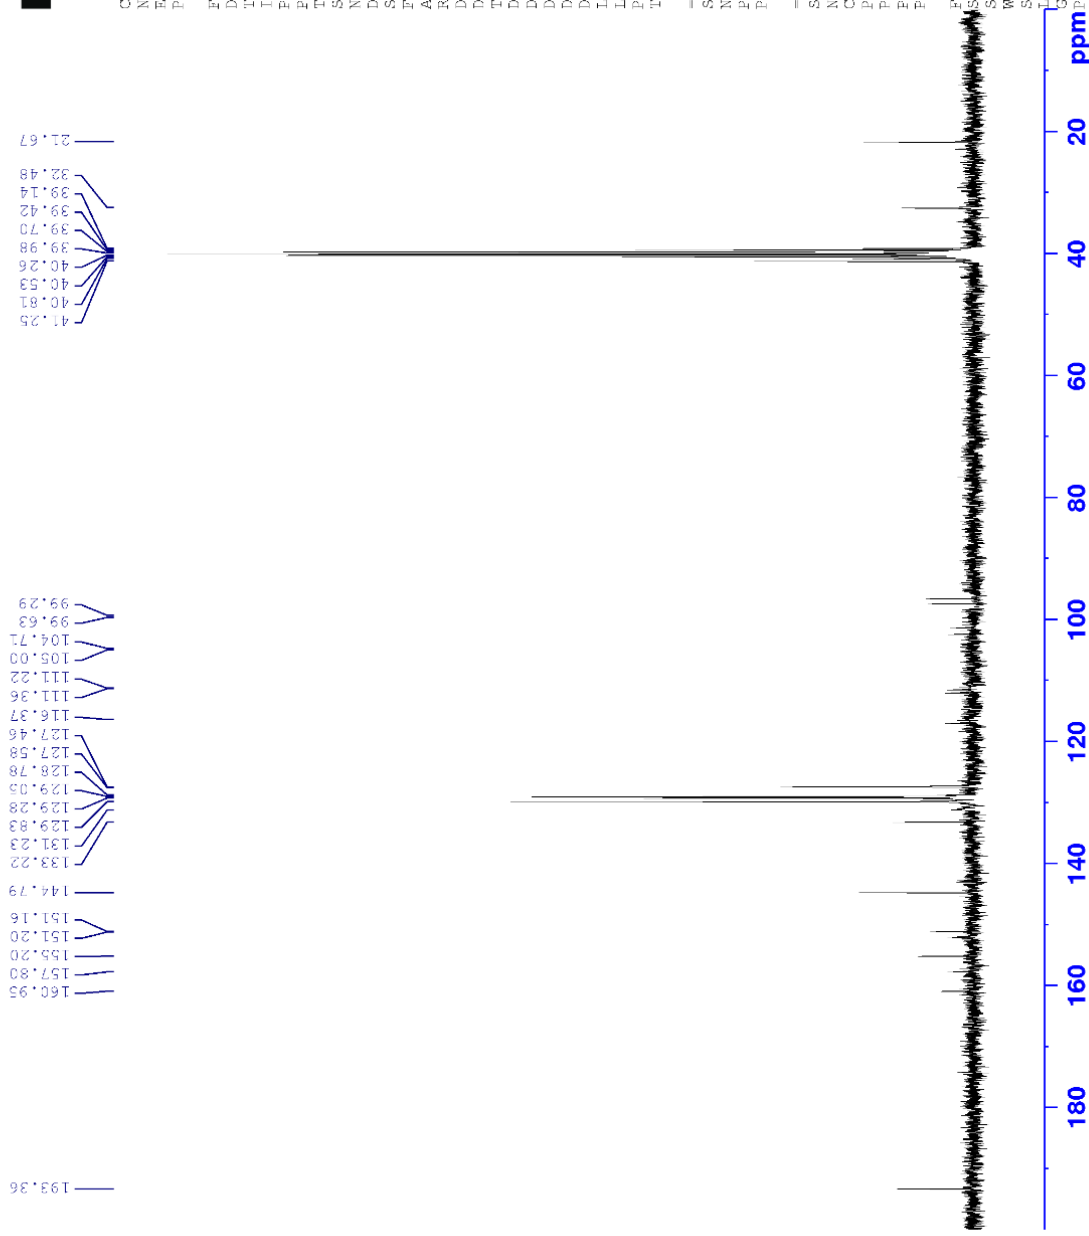

Current Data Parameters  
NAME Yusuf Ozkey  
EXPNO 341  
PROCNO 1

P2 - Acquisition Parameters  
Date\_ 20160519  
Time 17.05  
INSTRUM FOURIER300  
PROBHD 5 mm DUL 13C-1  
PULPROG zgpg  
TD 32768  
SOLVENT DMSO  
NS 2048  
DS 4  
SWH 24414.063 Hz  
FIDRES 0.745058 Hz  
AQ 0.6710886 sec  
RG 501.187  
DW 20.480 usec  
DE 6.50 usec  
TE 297.8 K  
D1 1.0000000 sec  
D11 0.0300000 sec  
D31 0.00001500 sec  
D32 0.89999998 sec  
D40 0.0003990 sec  
L4 23  
L5 26  
P32 90.00 usec  
TD0 1

----- CHANNEL f1 -----  
SFO1 75.4878887 MHz  
NUC1 13C  
P1 15.00 usec  
PL1 15.0000000 W

----- CHANNEL f2 -----  
SFO2 300.1812007 MHz  
NUC2 1H  
P2 15.00 usec  
PL2 15.0000000 W  
SFO3 10.0000000 MHz  
NUC3 1H  
P3 15.00 usec  
PL3 15.0000000 W

P2 - Processing parameters  
SI 32768  
SF 75.4803210 MHz  
WDW EM  
SSB 0  
LB 0  
GB 0  
PC 1.40

Data File: C:\LabSolutions\Data\Analiz\aac\TU-45A\_64.lcd

| Elmt | Val. | Min | Max | Elmt | Val. | Min | Max | Elmt | Val. | Min | Max | Elmt | Val. | Min | Max | Use Adduct |
|------|------|-----|-----|------|------|-----|-----|------|------|-----|-----|------|------|-----|-----|------------|
| H    | 1    | 9   | 40  | O    | 2    | 1   | 3   | S    | 2    | 0   | 2   | Ru   | 2    | 0   | 0   | H          |
| C    | 4    | 11  | 26  | F    | 1    | 0   | 1   | Cl   | 1    | 0   | 0   | I    | 3    | 0   | 0   |            |
| N    | 3    | 0   | 6   | P    | 3    | 0   | 0   | Br   | 1    | 0   | 1   |      |      |     |     |            |

Error Margin (ppm): 5

HC Ratio: unlimited

Max Isotopes: 3

MSn Iso RI (%): 10.00

DBE Range: 17.0 - 20.0

Apply N Rule: yes

Isotope RI (%): 1.00

MSn Logic Mode: AND

Electron Ions: both

Use MSn Info: no

Isotope Res: 10000

Max Results: 500

Event#: 1 MS(E+) Ret. Time: 6.573 -&gt; 6.800 - 7.253 -&gt; 8.931 Scan#: 987 -&gt; 1021 - 1089 -&gt; 1341

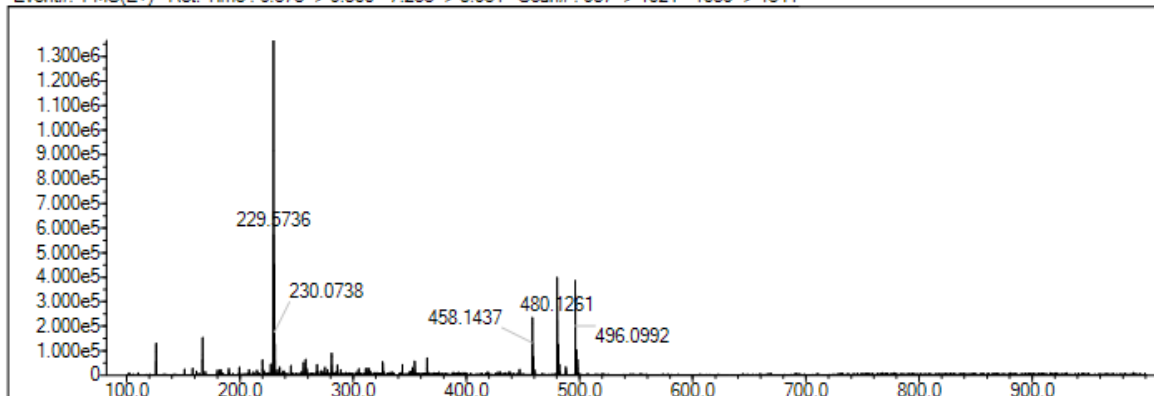

Measured region for 458.1437 m/z

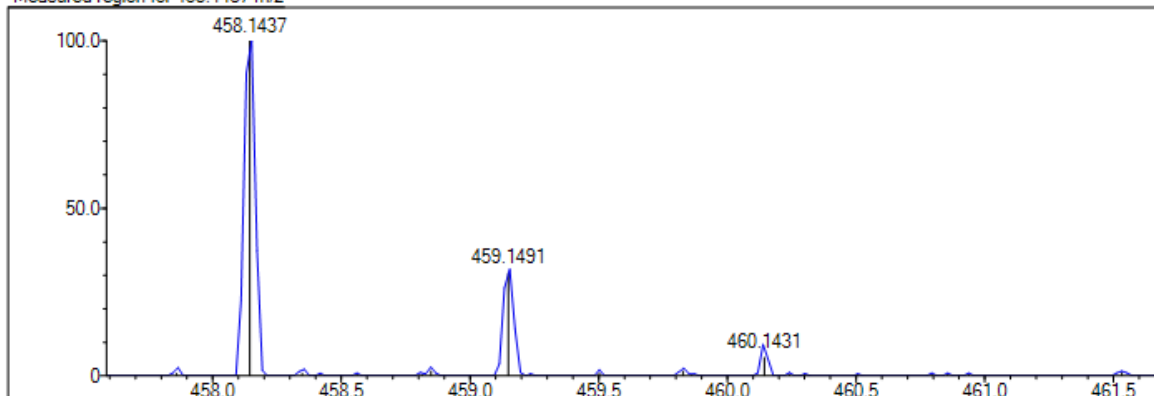

C25 H20 N5 O F S [M+H]+ : Predicted region for 458.1445 m/z

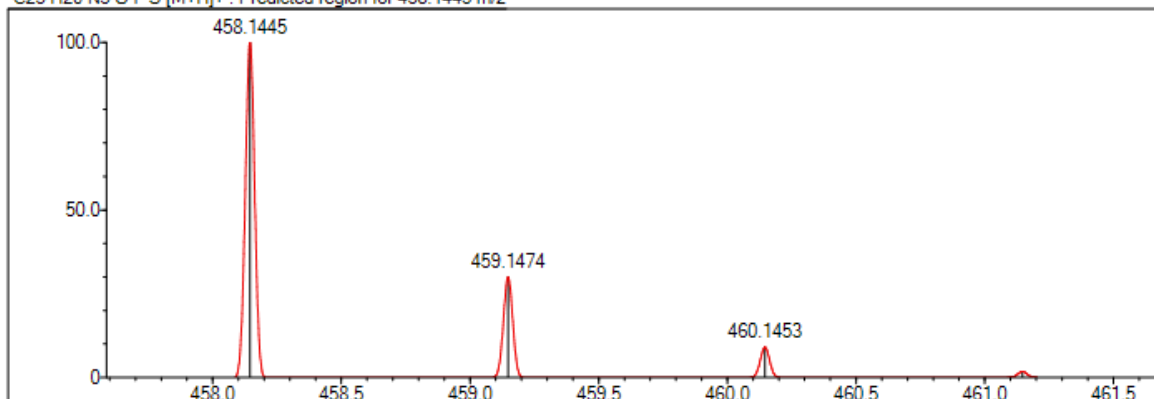

| Rank | Score | Formula (M)      | Ion    | Meas. m/z | Pred. m/z | Df. (mDa) | Df. (ppm) | Iso   | DBE  |
|------|-------|------------------|--------|-----------|-----------|-----------|-----------|-------|------|
| 1    | 87.11 | C25 H20 N5 O F S | [M+H]+ | 458.1437  | 458.1445  | -0.8      | -1.75     | 88.77 | 18.0 |

2-(4-(4-Methyl-5-(2-(3,4-dihydroxyphenyl)-2-oxo-ethylthio)-4H-1,2,4-triazol-3yl)-phenyl)-5(6)-fluoro-1H- benzimidazole (3l)

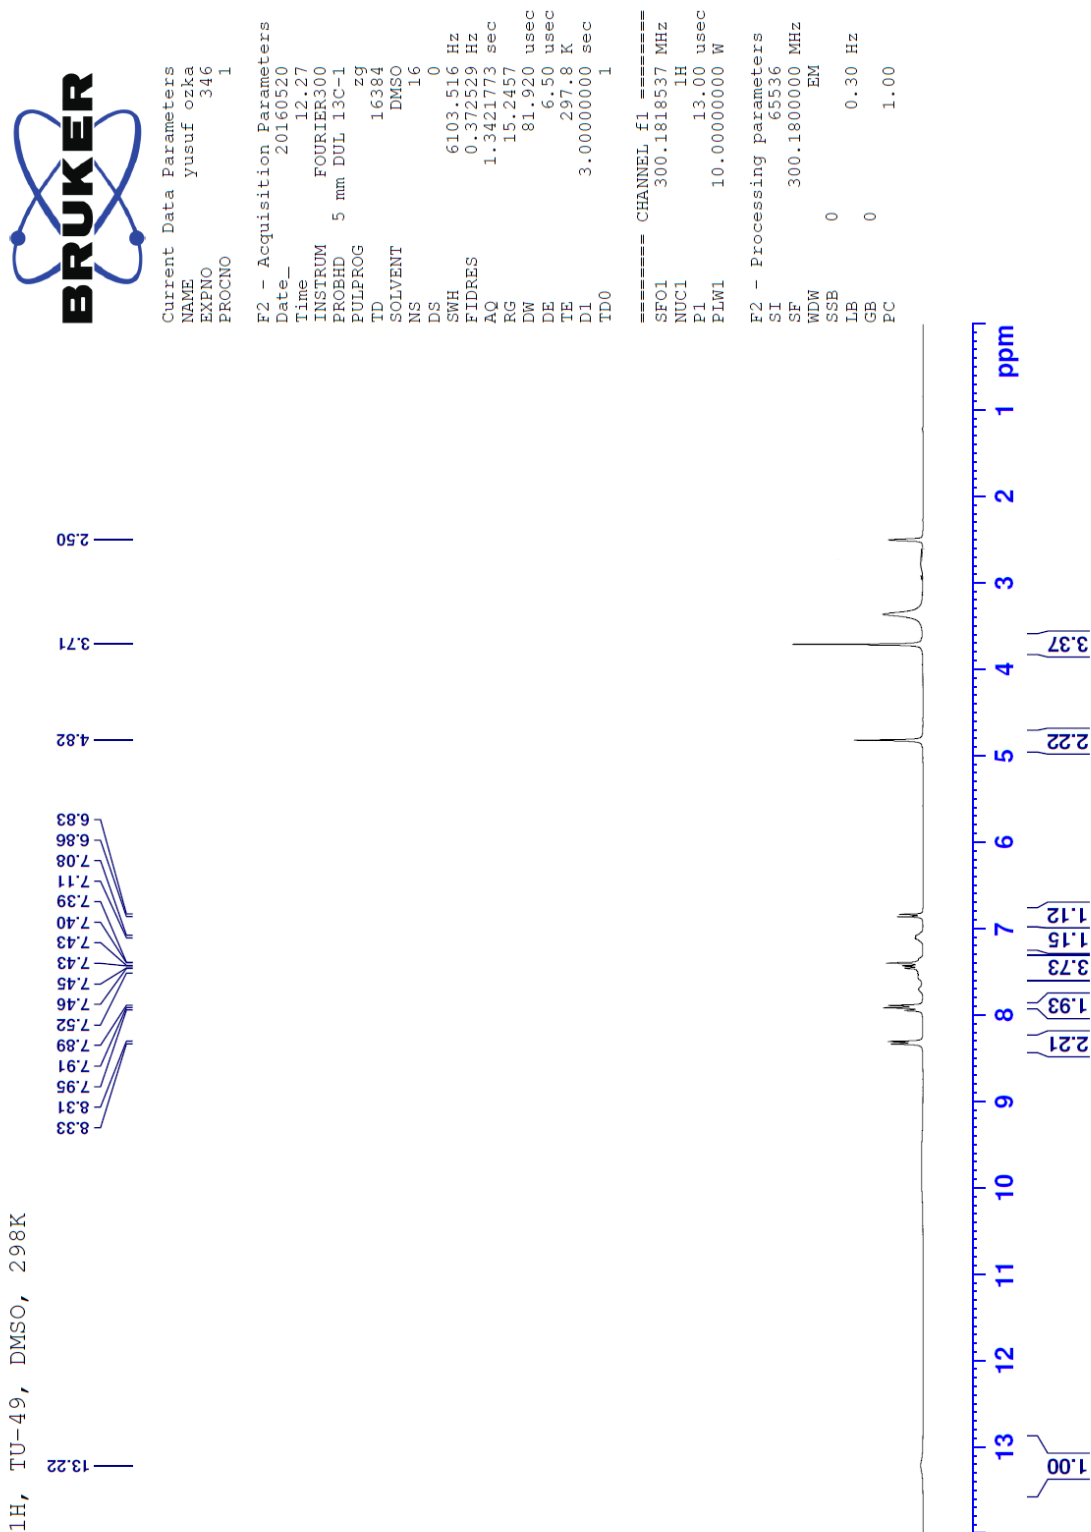

13C, TU-49, DMSO, 298K

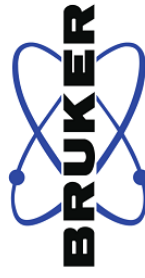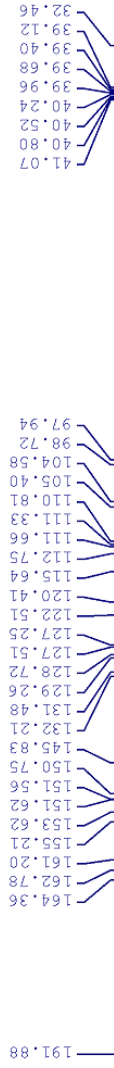

Current Data Parameters  
NAME Yusuf Ozkay  
EXPNO 347  
PROCNO 1

F2 - Acquisition Parameters  
Date\_ 20160520  
Time\_ 12.29  
INSTRUM FOURIER300  
PROBHD 5 mm DUL 13C-1  
PULPROG zgpg  
TD 32768  
SOLVENT DMSO  
NS 2048  
DS 4  
SWH 24414.063 Hz  
FIDRES 0.745058 Hz  
AQ 0.6710886 sec  
RG 501.187  
DM 20.480 usec  
DE 6.50 usec  
TE 297.9 K  
D1 1.00000000 sec  
D11 0.03000000 sec  
D31 0.00001500 sec  
D32 0.89999998 sec  
D40 0.0003990 sec  
L4 23  
L5 26  
F32 90.00 usec  
TD0 1

===== CHANNEL f1 =====  
SF01 75.4878687 MHz  
NUC1 13C  
P1 15.00 usec  
PLW1 15.00000000 W

===== CHANNEL f2 =====  
SF02 300.1812007 MHz  
NUC2 1H  
PCPD2 waltz16  
PLW2 10.00000000 W  
PLW12 0.20863999 W  
PLW13 0.10495000 W

F2 - Processing parameters  
SI 32768  
SF 75.4803210 MHz  
WDW EM  
SSB 0  
LB 1.00 Hz  
GB 0  
PC 1.40

180 160 140 120 100 80 60 40 20 ppm

Data File: C:\LabSolutions\Data\Analiz\luc\TU-49\_70.lcd

| Elmt | Val. | Min | Max | Elmt | Val. | Min | Max | Elmt | Val. | Min | Max | Elmt | Val. | Min | Max | Use Adduct |
|------|------|-----|-----|------|------|-----|-----|------|------|-----|-----|------|------|-----|-----|------------|
| H    | 1    | 9   | 40  | O    | 2    | 1   | 3   | S    | 2    | 0   | 2   | Ru   | 2    | 0   | 0   | H          |
| C    | 4    | 11  | 26  | F    | 1    | 0   | 1   | Cl   | 1    | 0   | 0   | I    | 3    | 0   | 0   |            |
| N    | 3    | 0   | 6   | P    | 3    | 0   | 0   | Br   | 1    | 0   | 1   |      |      |     |     |            |

Error Margin (ppm): 5

HC Ratio: unlimited

Max Isotopes: 3

MSn Iso RI (%): 10.00

DBE Range: 17.0 - 20.0

Apply N Rule: yes

Isotope RI (%): 1.00

MSn Logic Mode: AND

Electron Ions: both

Use MSn Info: no

Isotope Res: 10000

Max Results: 500

Event#: 1 MS(E+) Ret. Time : 5.867 -&gt; 6.253 - 8.347 -&gt; 9.160 Scan#: 881 -&gt; 939 - 1253 -&gt; 1375

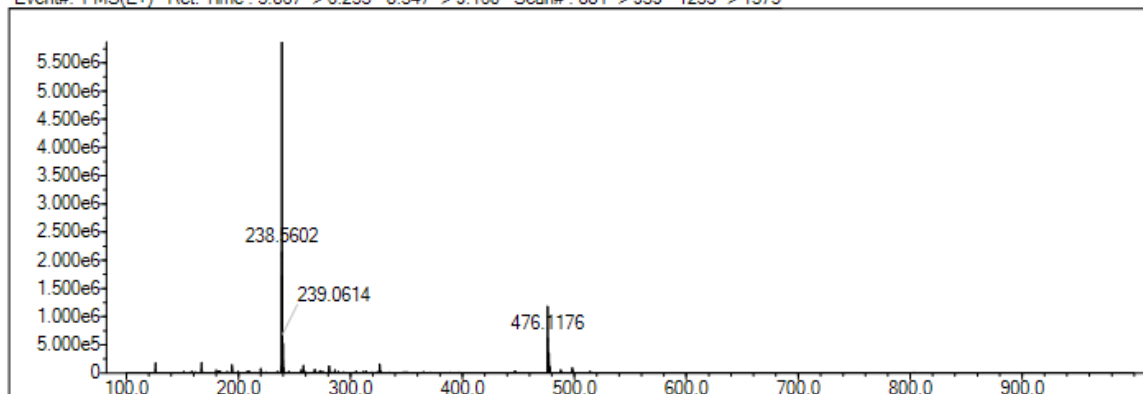

Measured region for 476.1176 m/z

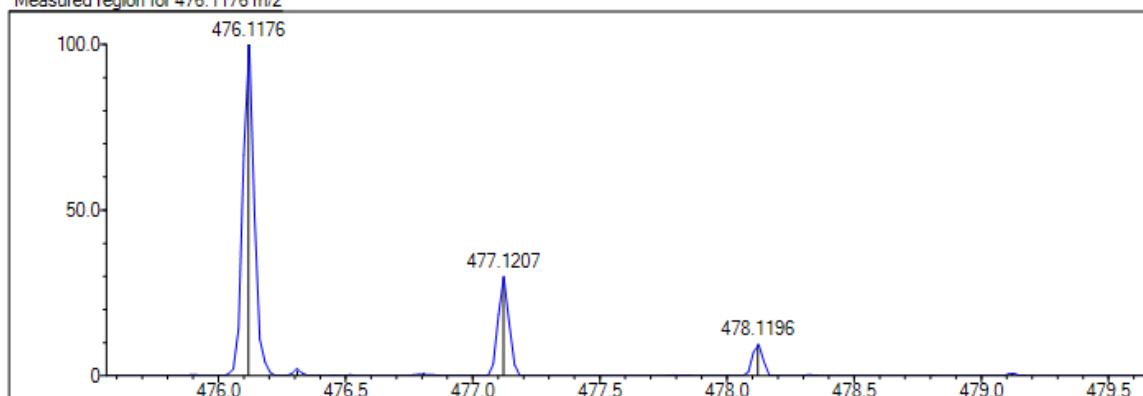

C24 H18 N5 O3 F S [M+H]+ : Predicted region for 476.1187 m/z

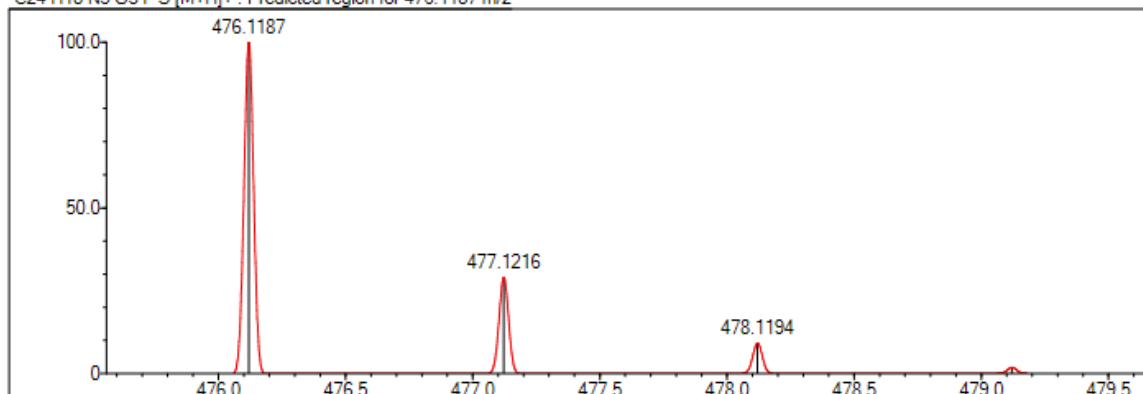

| Rank | Score | Formula (M)       | Ion    | Meas. m/z | Pred. m/z | Df. (mDa) | Df. (ppm) | Iso   | DBE  |
|------|-------|-------------------|--------|-----------|-----------|-----------|-----------|-------|------|
| 1    | 95.49 | C24 H18 N5 O3 F S | [M+H]+ | 476.1176  | 476.1187  | -1.1      | -2.31     | 98.72 | 18.0 |

2-(4-(4-Ethyl-5-(2-(4-cyanophenyl)-2-oxo-ethylthio)-4H-1,2,4-triazol-3-yl)-phenyl)-5(6)-fluoro-1H-benzoimidazole (3m)

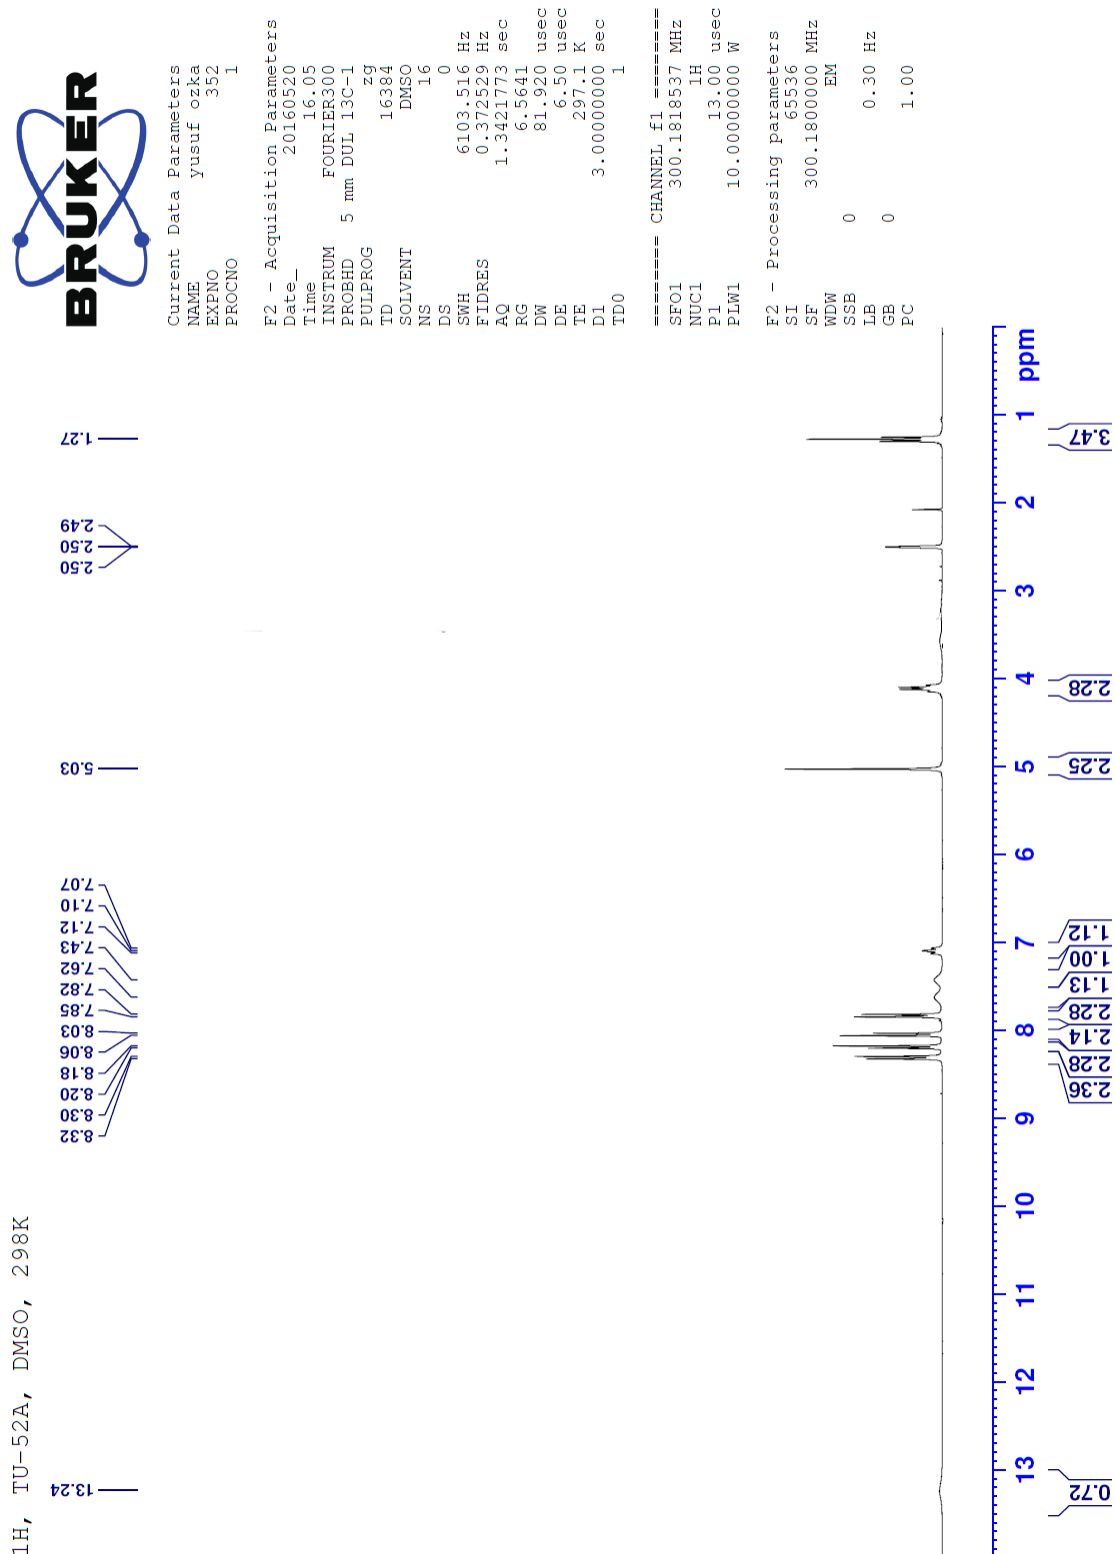

13C, TU-52A, DMSO, 298K

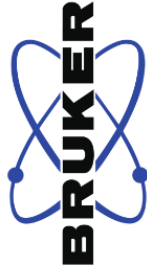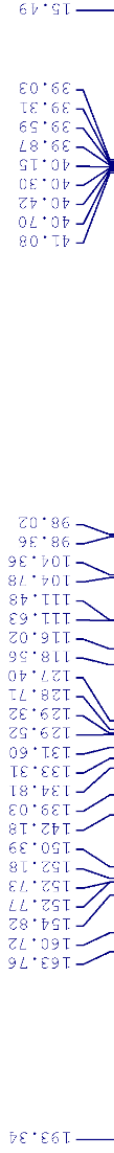

Current Data Parameters  
NAME Yusuf Ozkay  
EXPNO 353  
PROCNO 1

F2 - Acquisition Parameters  
Date\_ 20160520  
Time 16.06  
INSTRUM FOURIER300  
PROBHD 5 mm DUL 13C-1  
PULPROG zgpg  
TD 32768  
SOLVENT DMSO  
NS 2048  
DS 4  
SWH 24414.063 Hz  
FIDRES 0.745058 Hz  
AQ 0.6710886 sec  
RG 501.187  
DW 20.480 usec  
DE 6.50 usec  
TE 297.5 K  
D1 1.0000000 sec  
D11 0.0300000 sec  
D31 0.0001500 sec  
D32 0.8999998 sec  
D40 0.0009390 sec  
L4 23  
L5 26  
P32 90.00 usec  
TD0 1

===== CHANNEL f1 =====  
SFO1 75.4878687 MHz  
NUC1 13C  
P1 15.00 usec  
PLW1 15.0000000 W

===== CHANNEL f2 =====  
SFO2 300.1812007 MHz  
NUC2 1H  
CDEPRG2 waltz16  
PCPD2 90.00 usec  
PLW2 10.0000000 W  
PLW12 0.20863999 W  
PLW13 0.10495000 W

F2 - Processing parameters  
SI 32768  
SF 75.4803210 MHz  
WDW EM  
SSB 0  
LB 1.00 Hz  
GB 0  
PC 1.40

Data File: C:\LabSolutions\Data\Analiz\luc\TU-52A\_73.lcd

| Elmt | Val. | Min | Max | Elmt | Val. | Min | Max | Elmt | Val. | Min | Max | Elmt | Val. | Min | Max | Use Adduct |
|------|------|-----|-----|------|------|-----|-----|------|------|-----|-----|------|------|-----|-----|------------|
| H    | 1    | 9   | 40  | O    | 2    | 1   | 3   | S    | 2    | 0   | 2   | Ru   | 2    | 0   | 0   | H          |
| C    | 4    | 11  | 26  | F    | 1    | 0   | 1   | Cl   | 1    | 0   | 0   | I    | 3    | 0   | 0   |            |
| N    | 3    | 0   | 6   | P    | 3    | 0   | 0   | Br   | 1    | 0   | 1   |      |      |     |     |            |

Error Margin (ppm): 5

HC Ratio: unlimited

Max Isotopes: 3

MSn Iso RI (%): 10.00

DBE Range: 17.0 - 20.0

Apply N Rule: yes

Isotope RI (%): 1.00

MSn Logic Mode: AND

Electron Ions: both

Use MSn Info: no

Isotope Res: 10000

Max Results: 500

Event#: 1 MS(E+) Ret. Time : 6.653 -&gt; 6.973 - 8.427 -&gt; 9.295 Scan# : 999 -&gt; 1047 - 1265 -&gt; 1395

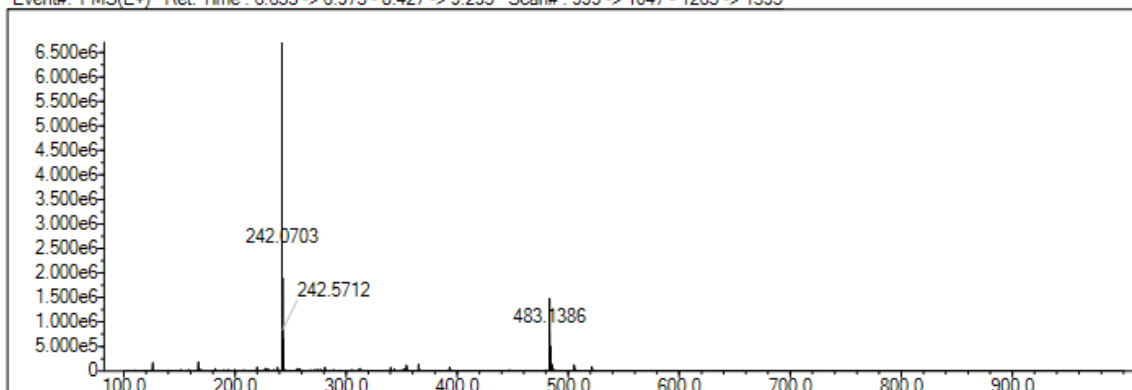

Measured region for 483.1386 m/z

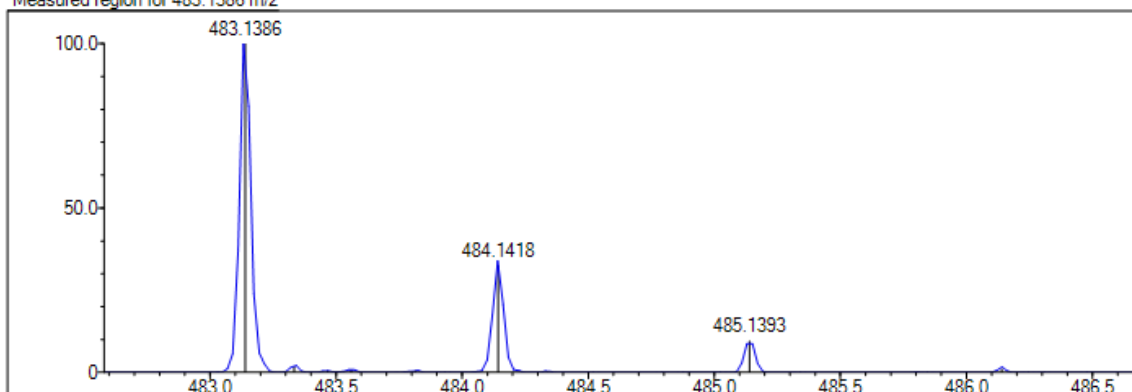

C26 H19 N6 O F S [M+H]+ : Predicted region for 483.1398 m/z

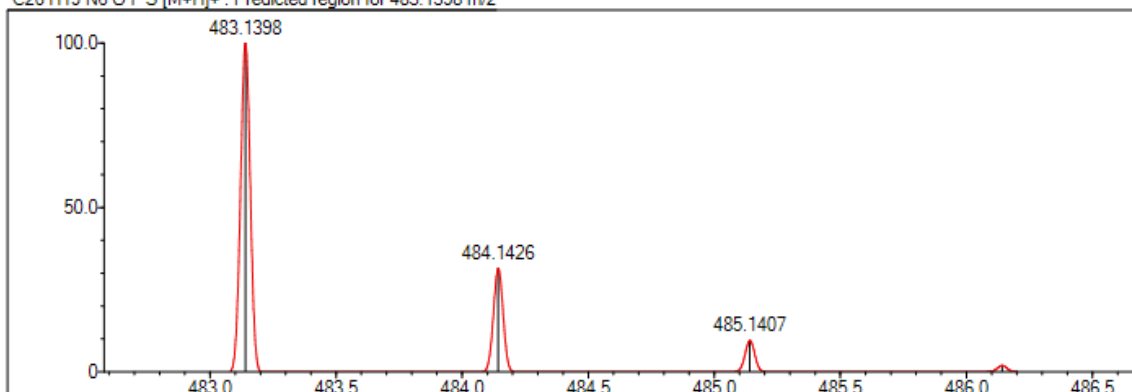

| Rank | Score | Formula (M)      | Ion    | Meas. m/z | Pred. m/z | Df. (mDa) | Df. (ppm) | Iso   | DBE  |
|------|-------|------------------|--------|-----------|-----------|-----------|-----------|-------|------|
| 1    | 83.59 | C26 H19 N6 O F S | [M+H]+ | 483.1386  | 483.1398  | -1.2      | -2.48     | 86.80 | 20.0 |



2-(4-(4-Ethyl-5-(2-(4-bromophenyl)-2-oxo-ethylthio)-4H-1,2,4-triazol-3yl)-phenyl)-5(6)-fluoro-1H-benzimidazole (3n)

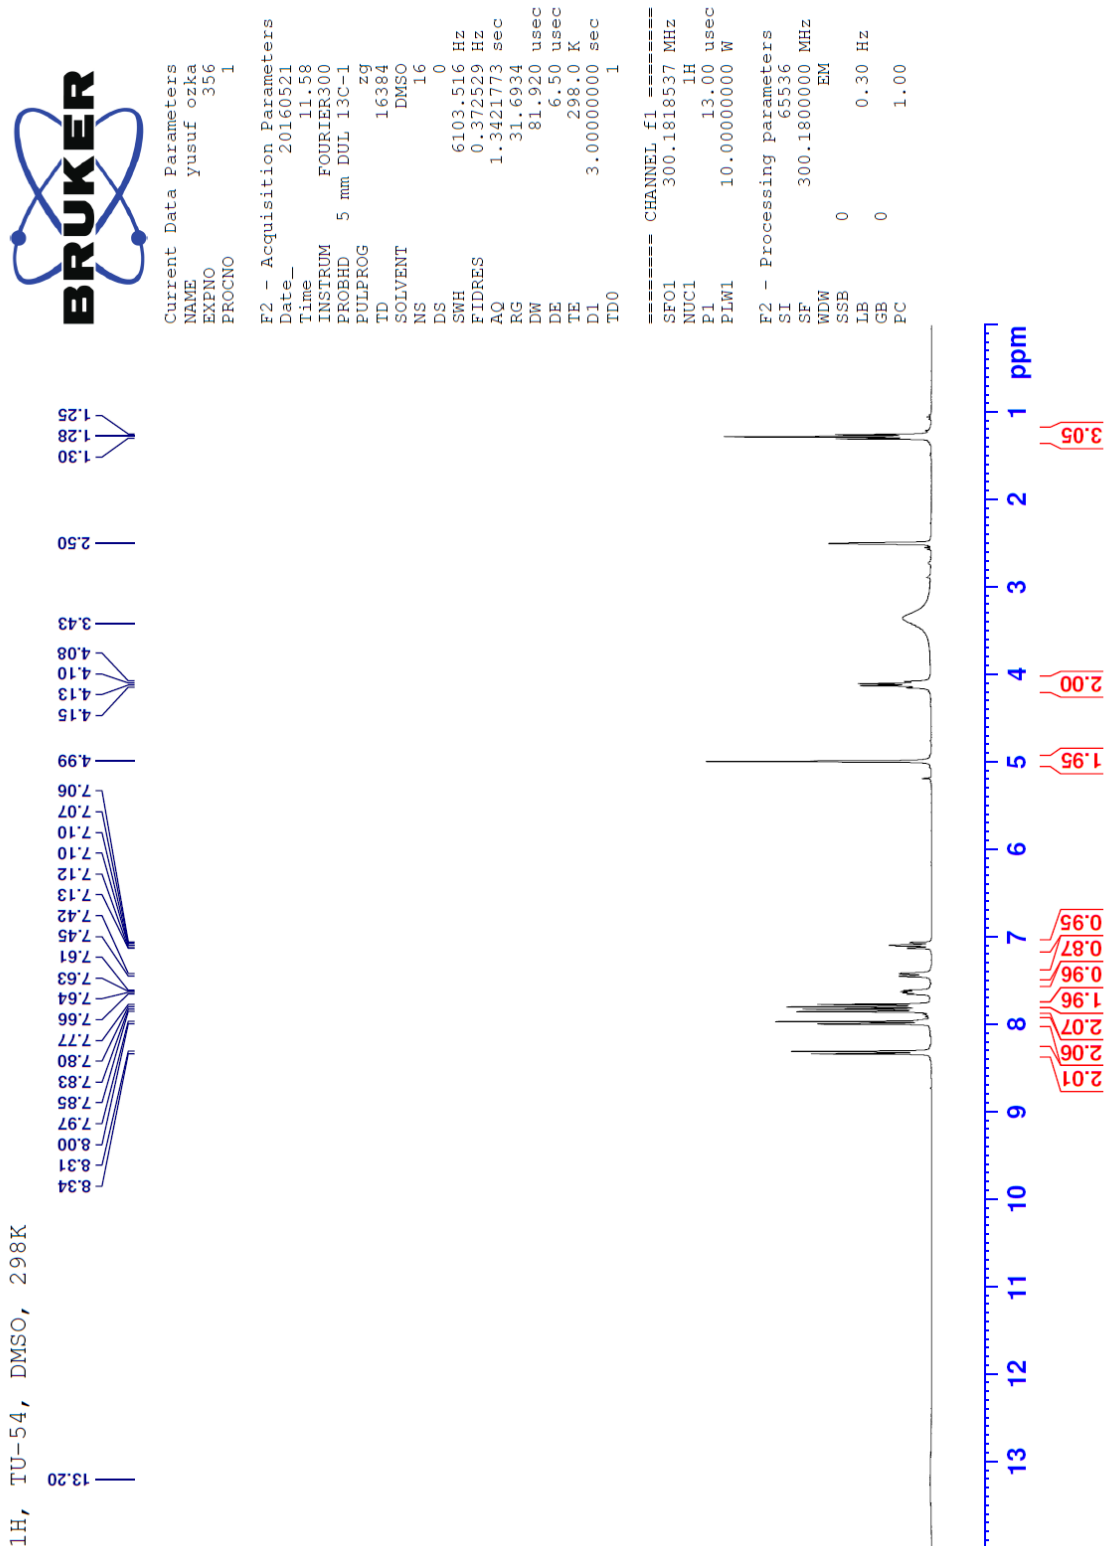

13C, TU-54, DMSO, 298K

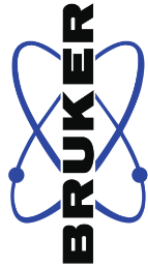

15.53  
39.13  
39.41  
39.69  
39.97  
40.25  
40.52  
40.80  
41.06  
48.13

99.29  
99.62  
105.49  
105.79  
111.18  
111.33  
124.32  
127.34  
127.46  
128.39  
128.79  
129.31  
130.92  
132.38  
134.81  
139.13  
150.47  
151.58  
151.62  
152.15  
154.76  
157.72  
160.84

193.09

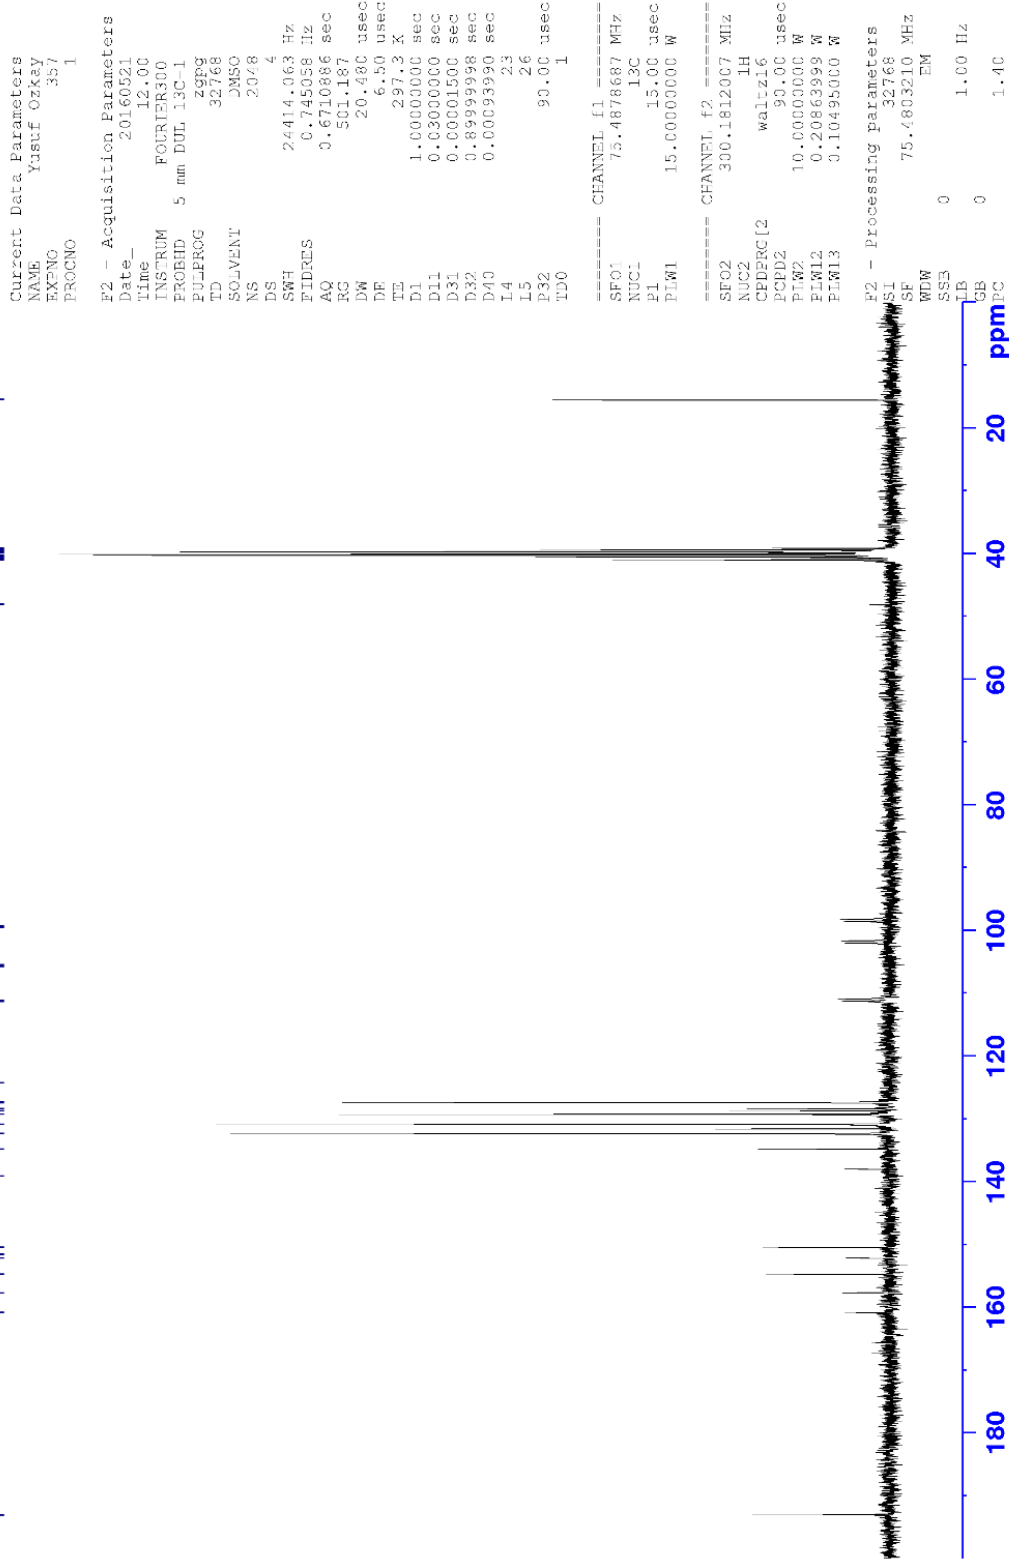

Data File: C:\LabSolutions\Data\Analiz\luac\TU-54\_76.lcd

| Elmt | Val. | Min | Max | Elmt | Val. | Min | Max | Elmt | Val. | Min | Max | Elmt | Val. | Min | Max | Use Adduct |
|------|------|-----|-----|------|------|-----|-----|------|------|-----|-----|------|------|-----|-----|------------|
| H    | 1    | 9   | 40  | O    | 2    | 1   | 3   | S    | 2    | 0   | 2   | Ru   | 2    | 0   | 0   | H          |
| C    | 4    | 11  | 26  | F    | 1    | 0   | 1   | Cl   | 1    | 0   | 0   | I    | 3    | 0   | 0   |            |
| N    | 3    | 0   | 6   | P    | 3    | 0   | 0   | Br   | 1    | 0   | 1   |      |      |     |     |            |

Error Margin (ppm): 5  
 HC Ratio: unlimited  
 Max Isotopes: 3  
 MSn Iso RI (%): 10.00

DBE Range: 17.0 - 20.0  
 Apply N Rule: yes  
 Isotope RI (%): 1.00  
 MSn Logic Mode: AND

Electron Ions: both  
 Use MSn Info: no  
 Isotope Res: 10000  
 Max Results: 500

Event#: 1 MS(E+) Ret. Time: 7.107 -&gt; 7.253 - 7.907 -&gt; 9.212 Scan#: 1067 -&gt; 1089 - 1187 -&gt; 1383

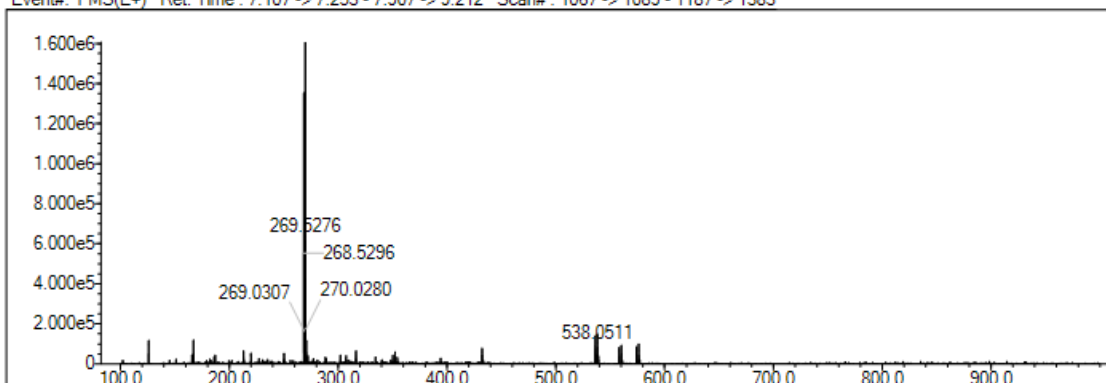

Measured region for 536.0537 m/z

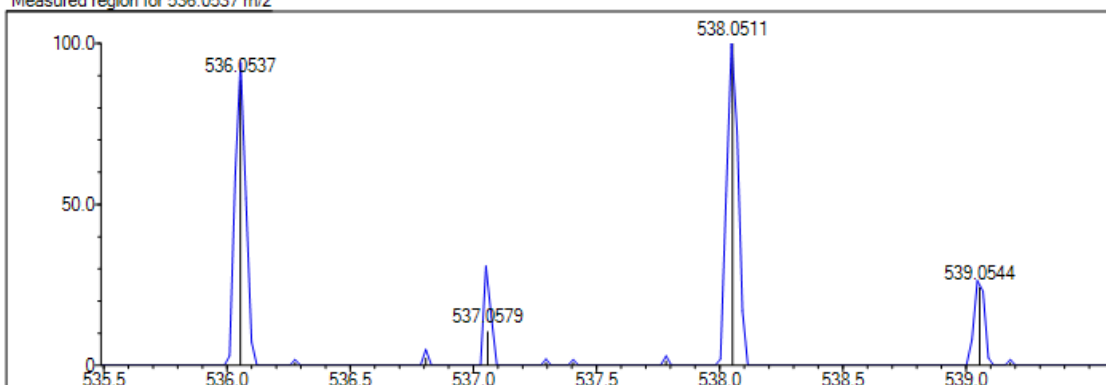C25 H19 N5 O F S Br [M+H]<sup>+</sup> : Predicted region for 536.0550 m/z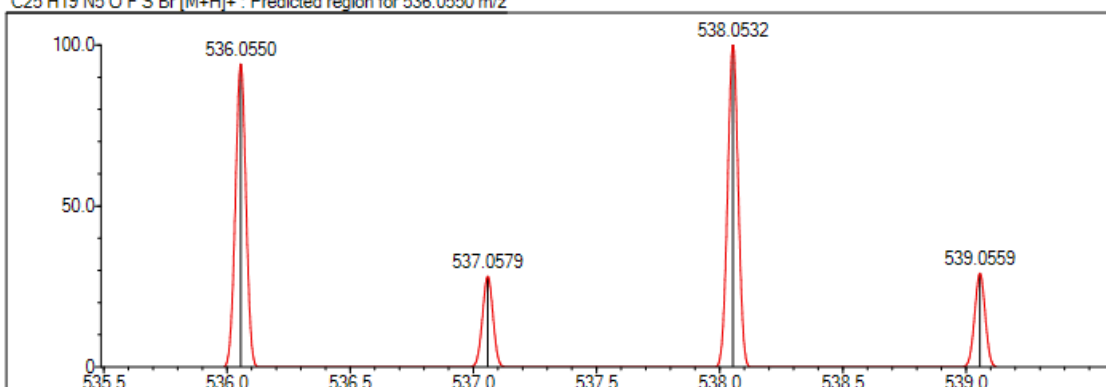

| Rank | Score | Formula (M)         | Ion                | Meas. m/z | Pred. m/z | Df. (mDa) | Df. (ppm) | Iso   | DBE  |
|------|-------|---------------------|--------------------|-----------|-----------|-----------|-----------|-------|------|
| 1    | 71.14 | C25 H19 N5 O F S Br | [M+H] <sup>+</sup> | 536.0537  | 536.0550  | -1.3      | -2.43     | 73.78 | 18.0 |

**2-(4-(4-Ethyl-5-(2-(4-methylphenyl)-2-oxo-ethylthio)-4H-1,2,4-triazol-3yl)-phenyl)-5(6)-fluoro-1H-benzimidazole (3o)**

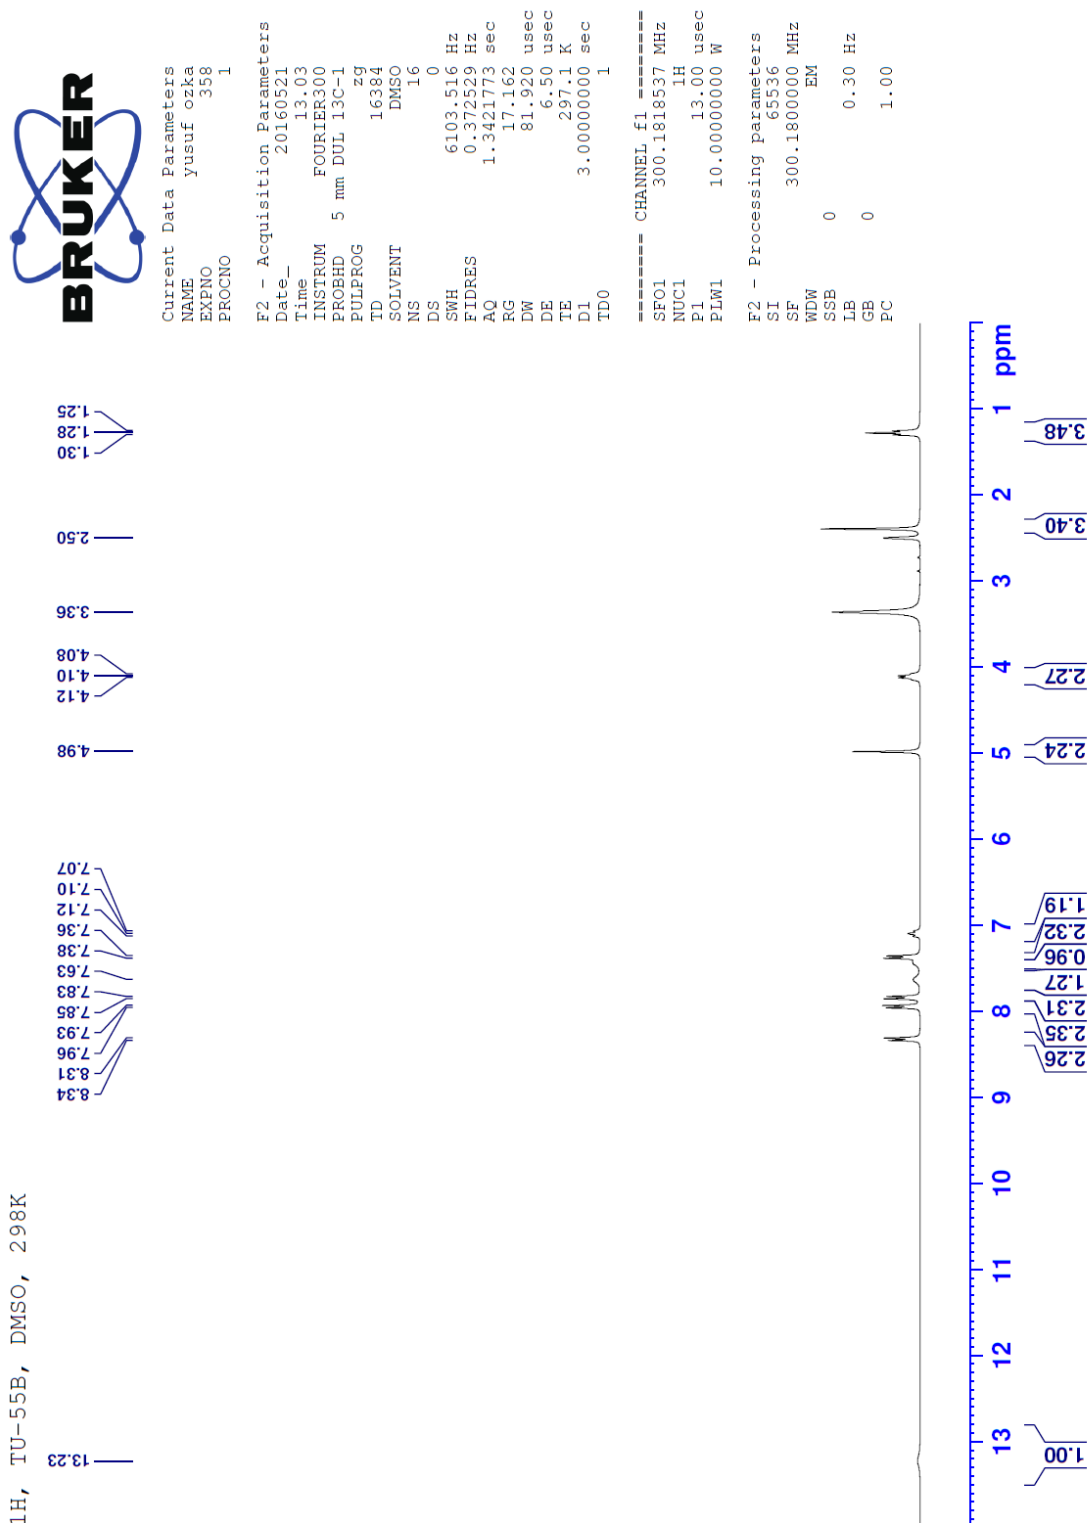

13C, TU-55B, DMSO, 298K

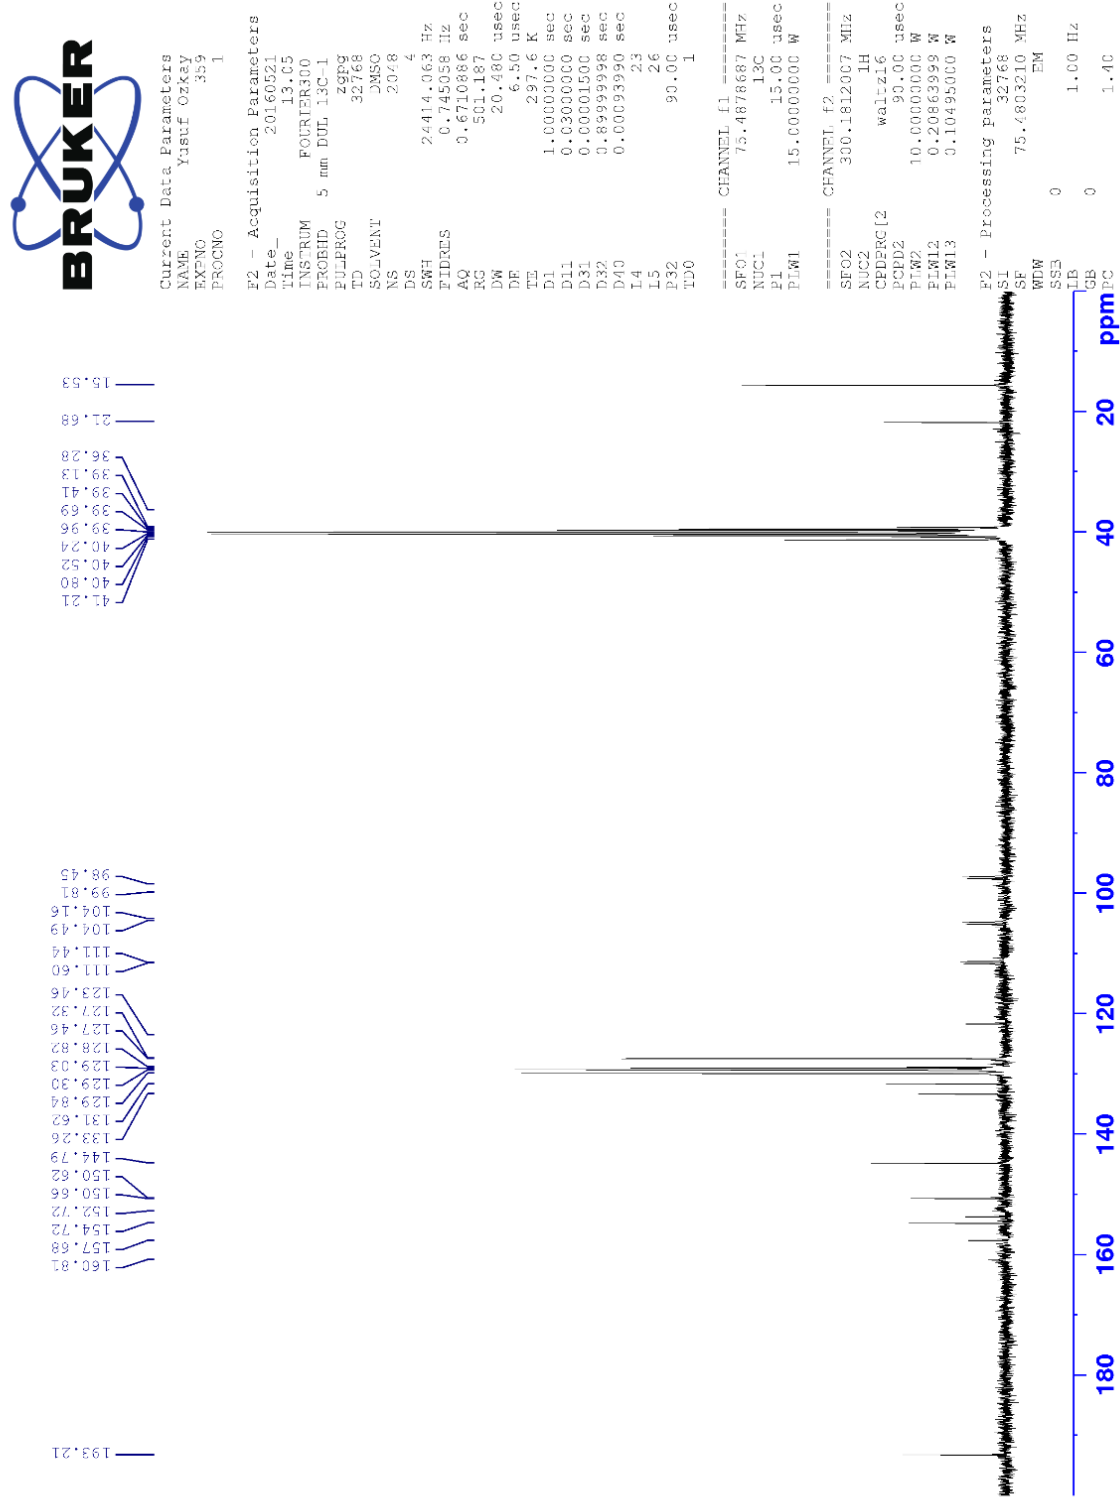

Data File: C:\LabSolutions\Data\Analz\aac\TU-73\_11.lcd

| Elmt | Val. | Min | Max | Elmt | Val. | Min | Max | Elmt | Val. | Min | Max | Elmt | Val. | Min | Max | Use Adduct |
|------|------|-----|-----|------|------|-----|-----|------|------|-----|-----|------|------|-----|-----|------------|
| H    | 1    | 15  | 40  | O    | 2    | 1   | 2   | S    | 2    | 1   | 1   | Ru   | 2    | 0   | 0   | H          |
| C    | 4    | 12  | 40  | F    | 1    | 0   | 1   | Cl   | 1    | 0   | 0   | I    | 3    | 0   | 0   |            |
| N    | 3    | 1   | 6   | P    | 3    | 0   | 0   | Br   | 1    | 0   | 0   |      |      |     |     |            |

Error Margin (ppm): 15

DBE Range: 5.0 - 25.0

Electron Ions: both

HC Ratio: unlimited

Apply N Rule: yes

Use MSn Info: no

Max Isotopes: 3

Isotope RI (%): 1.00

Isotope Res: 10000

MSn Iso RI (%): 10.00

MSn Logic Mode: AND

Max Results: 500

Event#: 1 MS(E+) Ret. Time: 6.067 -&gt; 6.947 Scan#: 911 -&gt; 1043

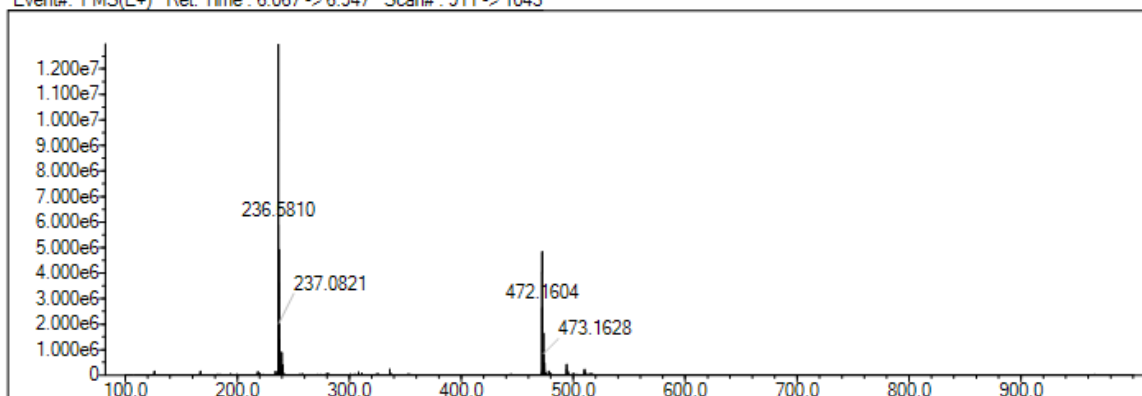

Measured region for 472.1604 m/z

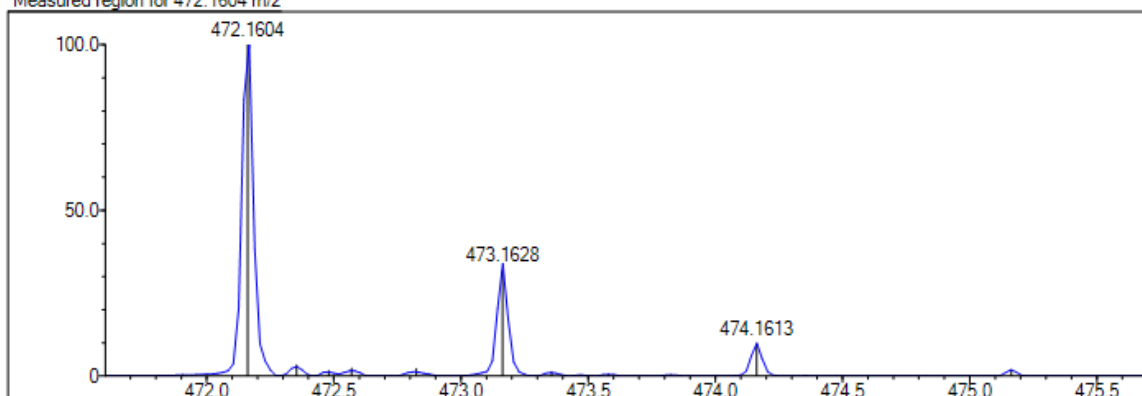

C26 H22 N5 O F S [M+H]+ : Predicted region for 472.1602 m/z

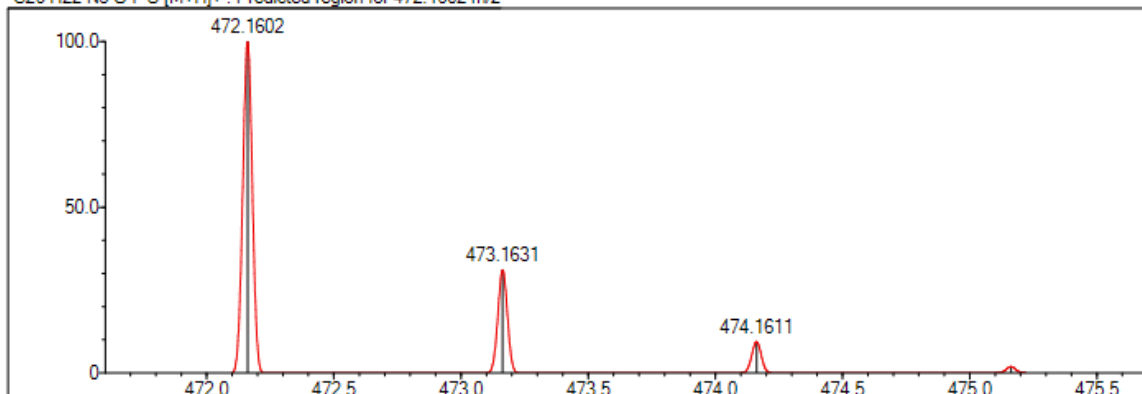

| Rank | Score | Formula (M)      | Ion    | Meas. m/z | Pred. m/z | Df. (mDa) | Df. (ppm) | Iso   | DBE  |
|------|-------|------------------|--------|-----------|-----------|-----------|-----------|-------|------|
| 1    | 92.81 | C26 H22 N5 O F S | [M+H]+ | 472.1604  | 472.1602  | 0.2       | 0.42      | 92.81 | 18.0 |

2-(4-(4-Ethyl-5-(2-(3,4-dihydroxyphenyl)-2-oxo-ethylthio)-4H-1,2,4-triazol-3-yl)-phenyl)-5(6)-fluoro-1H- benzimidazole (3p)

<sup>1</sup>H, TU-59, DMSO, 298K

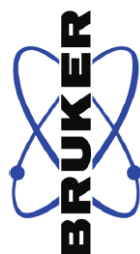

Current Data Parameters  
NAME Yusuf ozka  
EXPNO 366  
PROCNO 1

F2 - Acquisition Parameters  
Date\_ 20160523  
Time 8.04  
INSTRUM FOURIER300  
PROBHD 5 mm DUL 13C-1  
PULPROG zg  
TD 16384  
SOLVENT DMSO  
NS 16  
DS 0  
SWH 6103.516 Hz  
FIDRES 0.372529 Hz  
AQ 1.342173 sec  
RG 15.352  
DW 81.920 usec  
DE 6.50 usec  
TE 298.0 K  
D1 3.0000000 sec  
TD0 1

===== CHANNEL f1 =====  
SF01 300.1818537 MHz  
NUC1 1H  
P1 13.00 usec  
PLW1 10.0000000 W

F2 - Processing parameters  
SI 65536  
SF 300.1800000 MHz  
WDW EM  
SSB 0  
LB 0.30 Hz  
GB 0  
PC 1.00

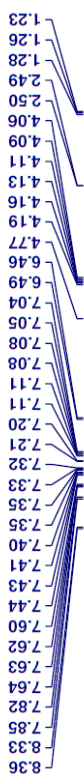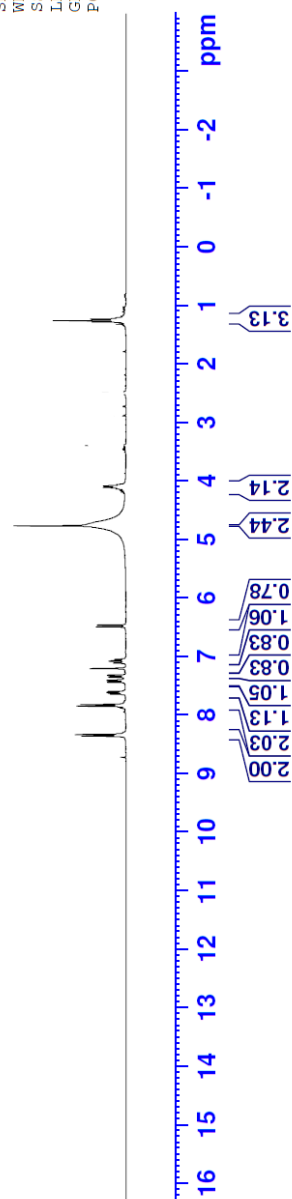

13C, TU-59, DMSO, 298K

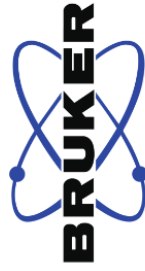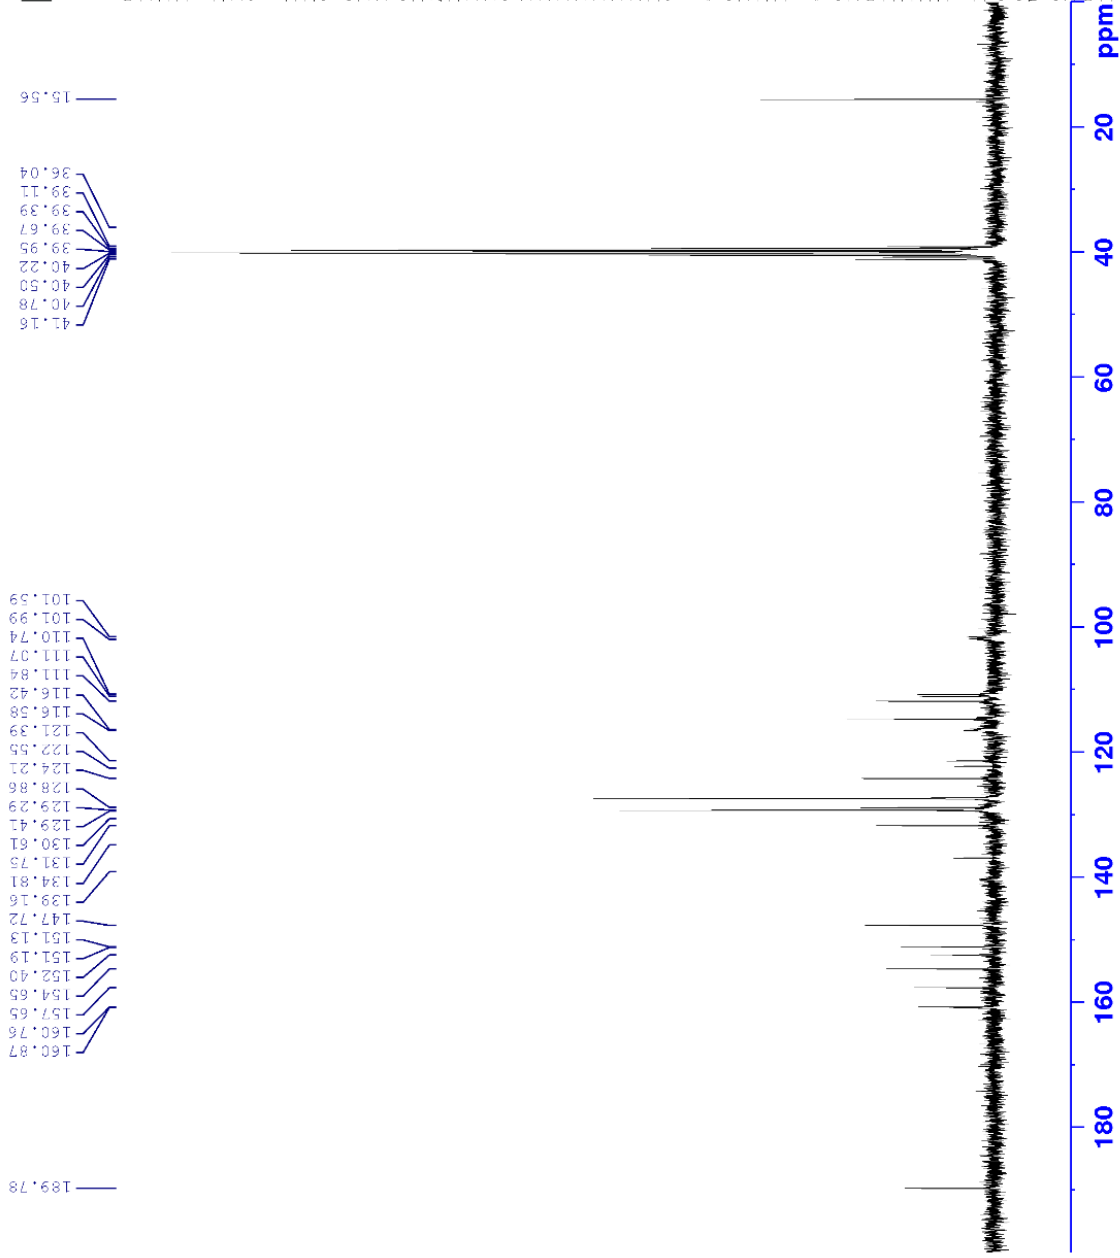

Current Data Parameters  
NAME Yusuf Ozkay  
EXPNO 367  
PROCNO 1

F2 - Acquisition Parameters  
Date\_ 20160523  
Time 8.06  
INSTRUM FOURIER300  
PROBHD 5 mm DUL 13C-1  
PULPROG zgpg  
TD 32768  
SOLVENT DMSO  
NS 2078  
DS 4  
SWH 24414.063 Hz  
FIDRES 0.745038 Hz  
AQ 0.6710886 sec  
RG 501.187  
DW 20.480 usec  
DE 6.50 usec  
TE 298.0 K  
D1 1.0000000 sec  
D11 0.0300000 sec  
D31 0.0001500 sec  
D32 0.8999998 sec  
D40 0.0009990 sec  
I4 23  
L5 26  
P32 90.00 usec  
TD0 1

===== CHANNEL f1 =====  
SF01 75.4878687 MHz  
NUC1 13C  
P1 15.00 usec  
PLW1 15.0000000 W

===== CHANNEL f2 =====  
SF02 300.1812007 MHz  
NUC2 1H  
CPDPRG2 waltz16  
PCPDZ 90.00 usec  
PLW2 10.0000000 W  
PLW12 0.2086399 W  
PLW13 0.1049500 W

F2 - Processing parameters  
SI 32768  
SF 75.4803210 MHz  
WDW EM  
SSB 0  
IB 1.00 Hz  
GB 0  
PC 1.40



Data File: C:\LabSolutions\Data\Analiz\aac\TU-59\_79.lcd

| Elmt | Val. | Min | Max | Elmt | Val. | Min | Max | Elmt | Val. | Min | Max | Elmt | Val. | Min | Max | Use Adduct |
|------|------|-----|-----|------|------|-----|-----|------|------|-----|-----|------|------|-----|-----|------------|
| H    | 1    | 9   | 40  | O    | 2    | 1   | 3   | S    | 2    | 0   | 2   | Ru   | 2    | 0   | 0   | H          |
| C    | 4    | 11  | 26  | F    | 1    | 0   | 1   | Cl   | 1    | 0   | 0   | I    | 3    | 0   | 0   |            |
| N    | 3    | 0   | 6   | P    | 3    | 0   | 0   | Br   | 1    | 0   | 1   |      |      |     |     |            |

Error Margin (ppm): 5

HC Ratio: unlimited

Max Isotopes: 3

MSn Iso RI (%): 10.00

DBE Range: 17.0 - 20.0

Apply N Rule: yes

Isotope RI (%): 1.00

MSn Logic Mode: AND

Electron Ions: both

Use MSn Info: no

Isotope Res: 10000

Max Results: 500

Event#: 1 MS(E+) Ret. Time : 6.040 -&gt; 6.307 - 7.453 -&gt; 8.733 Scan#: 907 -&gt; 947 - 1119 -&gt; 1311

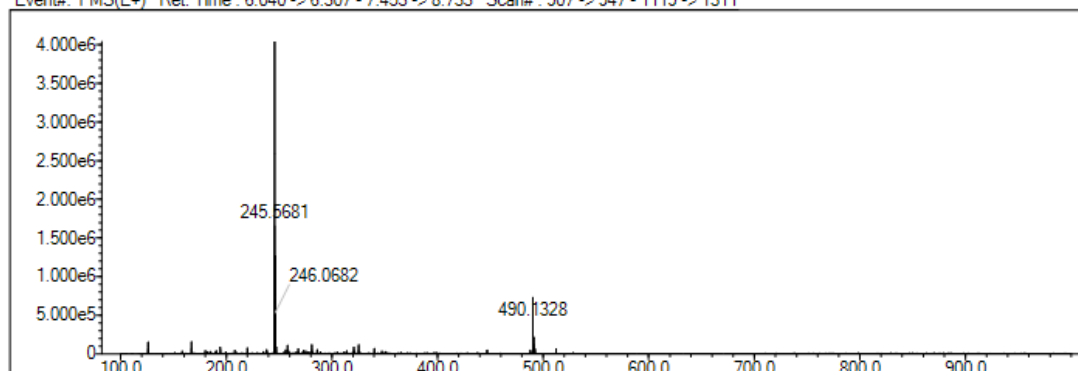

Measured region for 490.1328 m/z

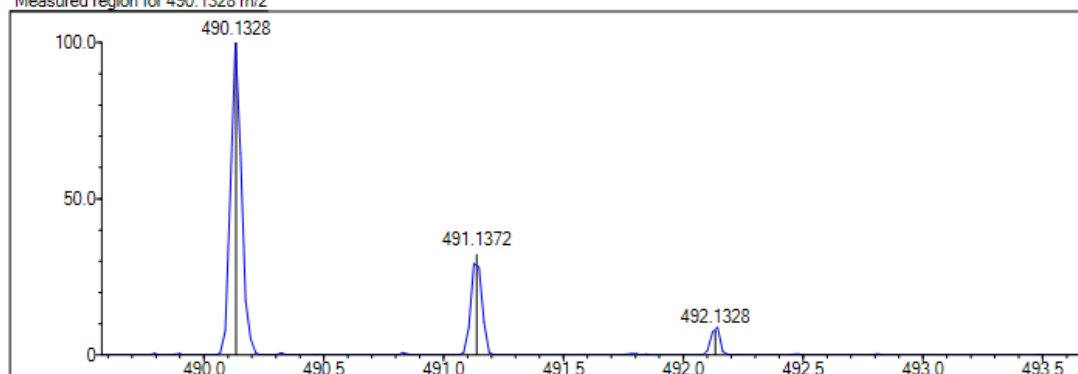C25 H20 N5 O3 F S [M+H]<sup>+</sup> : Predicted region for 490.1344 m/z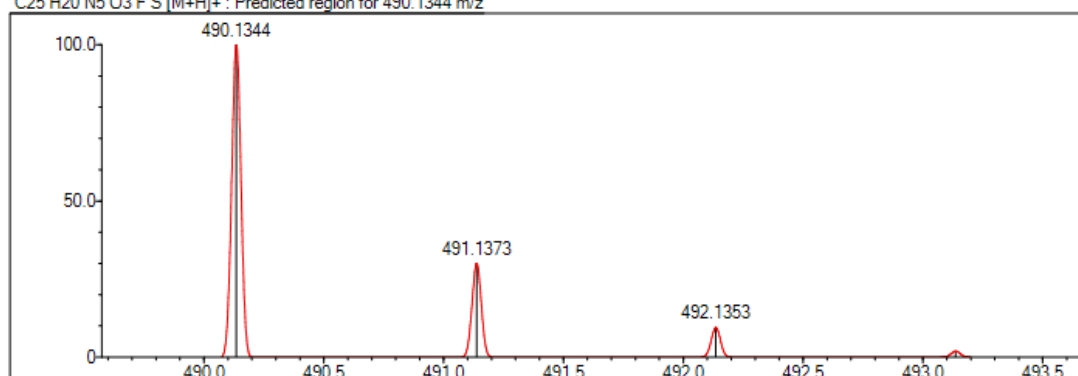

| Rank | Score | Formula (M)       | Ion                | Meas. m/z | Pred. m/z | Df. (mDa) | Df. (ppm) | Iso   | DBE  |
|------|-------|-------------------|--------------------|-----------|-----------|-----------|-----------|-------|------|
| 1    | 76.02 | C25 H20 N5 O3 F S | [M+H] <sup>+</sup> | 490.1328  | 490.1344  | -1.6      | -3.26     | 80.57 | 18.0 |

Structure of the synthesized compounds were elucidated by IR,  $^1\text{H}$  NMR,  $^{13}\text{C}$  NMR and HRMS analysis. In  $^1\text{H}$ -NMR spectra, protons belonging to methylene bridge were recorded between 4.80 ppm and 2.64 ppm. Methyl protons in the methyl substituted derivatives (**5a-5d** and **5i-5l**) had singlet peak at 3.71 ppm or 3.72 ppm. Ethyl protons in the ethyl substituted derivatives (**5e-5h** and **5m-5p**) were observed as triplet and quartet peaks at 1.26 ppm- 1.28 ppm and 4.10 ppm- 4.12 ppm, respectively. Protons of aromatic rings were recorded between 6.81 ppm and 8.34 ppm and benzimidazole NH had singlet peak over 13.20 ppm. In  $^{13}\text{C}$ -NMR, aliphatic carbons recorded between 15 ppm and 49 ppm and aromatic carbons gave peak from 97 ppm to 163 ppm. Carbonyl carbon were recorded around 190 ppm. Carbon-fluorine splitting in the fluorinated compounds were observed as expected. In high resolution mass spectrum, all masses were found as expected with maximum 5 ppm difference. In the mass spectrum, all masses were matched with the expected M+H values

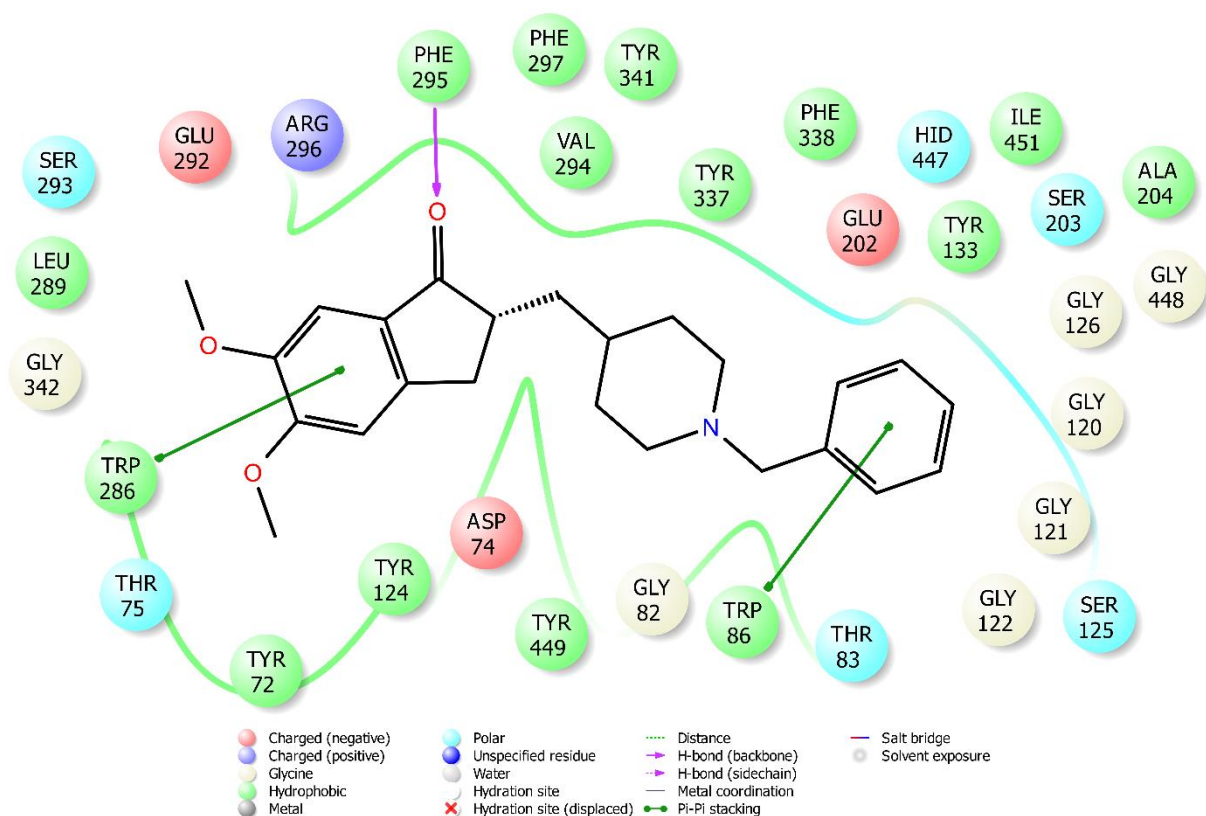

**Figure S1.** Two-dimensional interaction mode of donepezil in the enzyme active site of AChE.

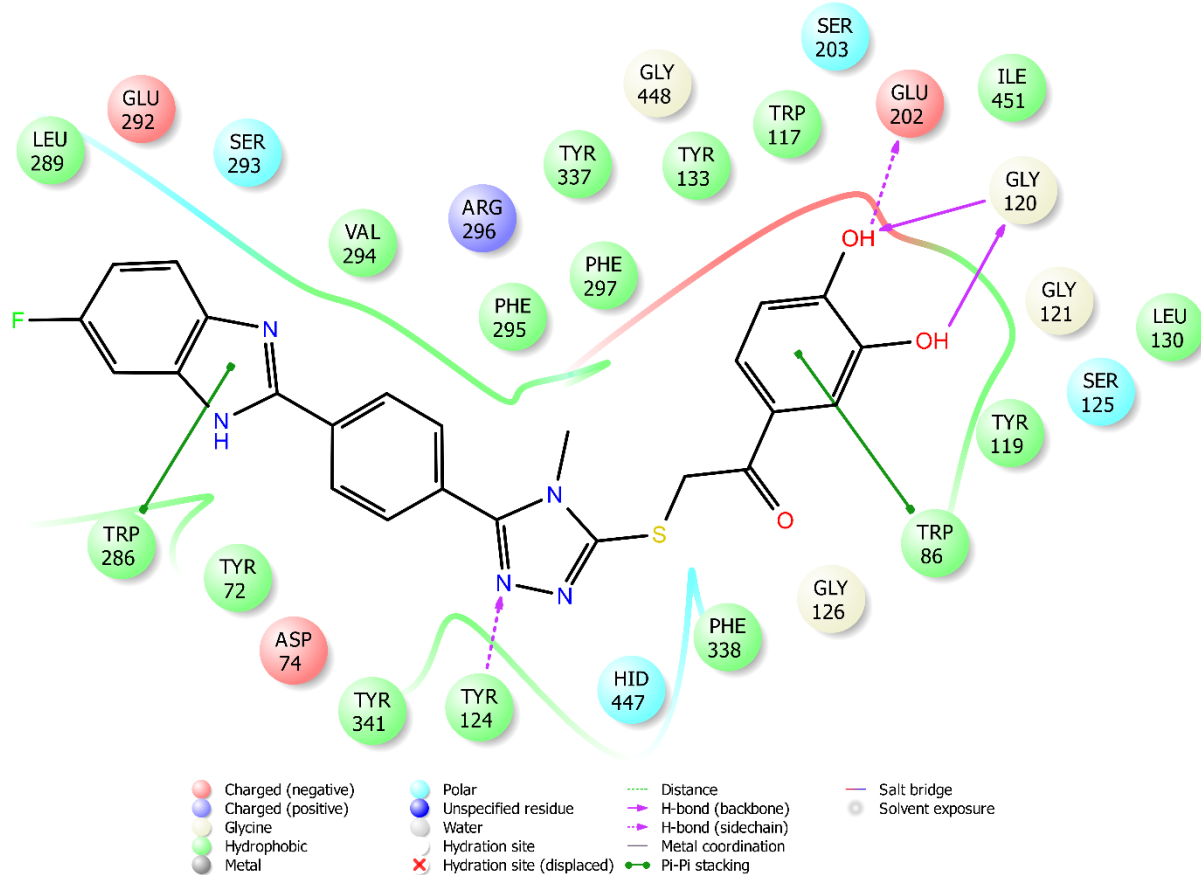

**Figure S2.** Two-dimensional interaction mode of compound 51 in the enzyme active site of AChE.

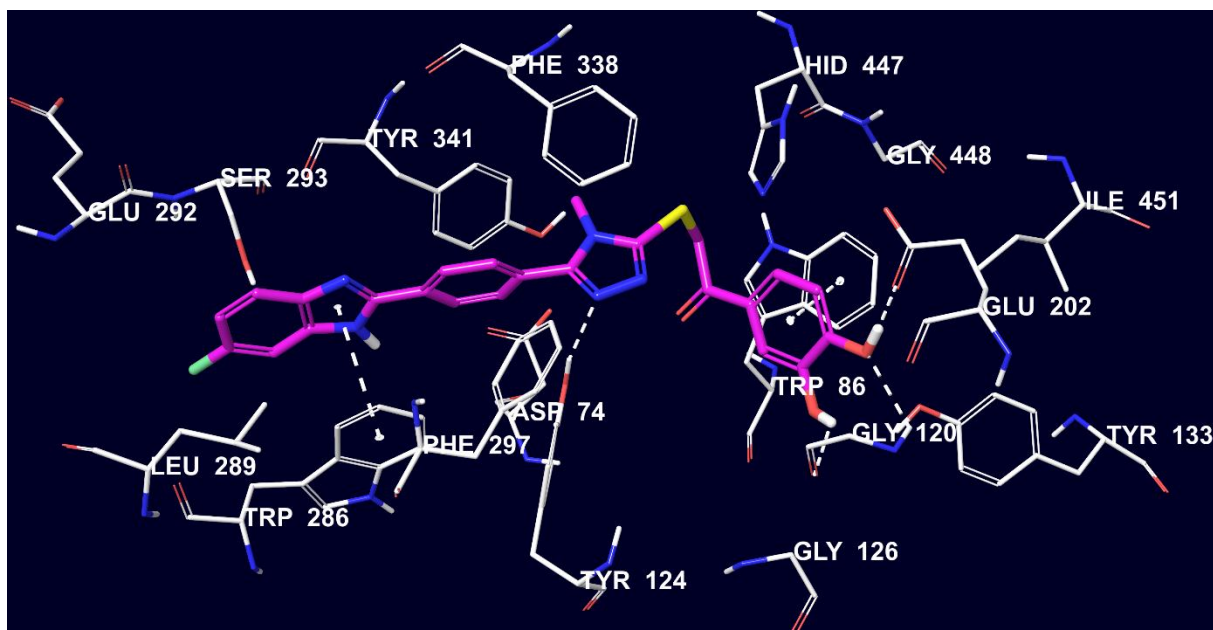

**Figure S3.** The interacting mode of compound **5l** in the active region of AChE. The inhibitor, colored with pink, and the important residues, colored with white, in the active site of the enzyme are presented by tube model.

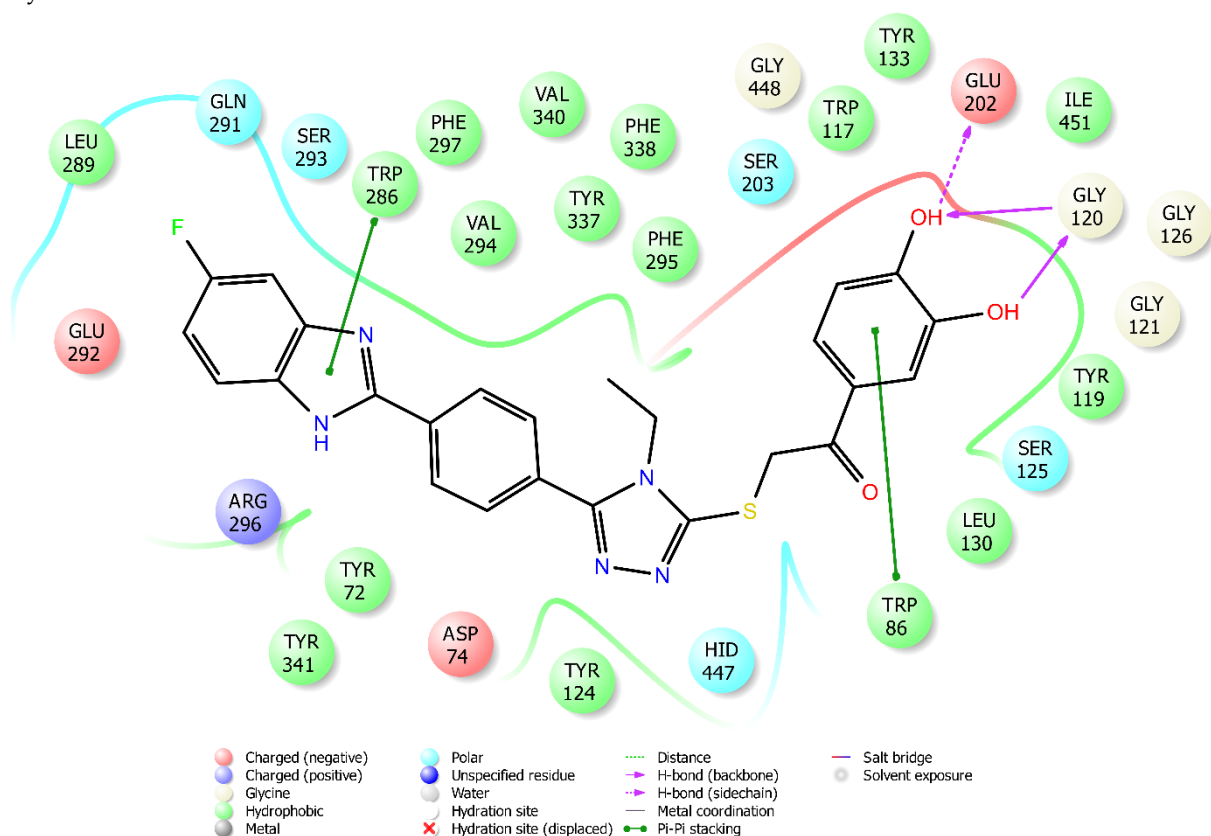

**Figure S4.** Two-dimensional interaction mode of compound **5p** in the enzyme active site of AChE.

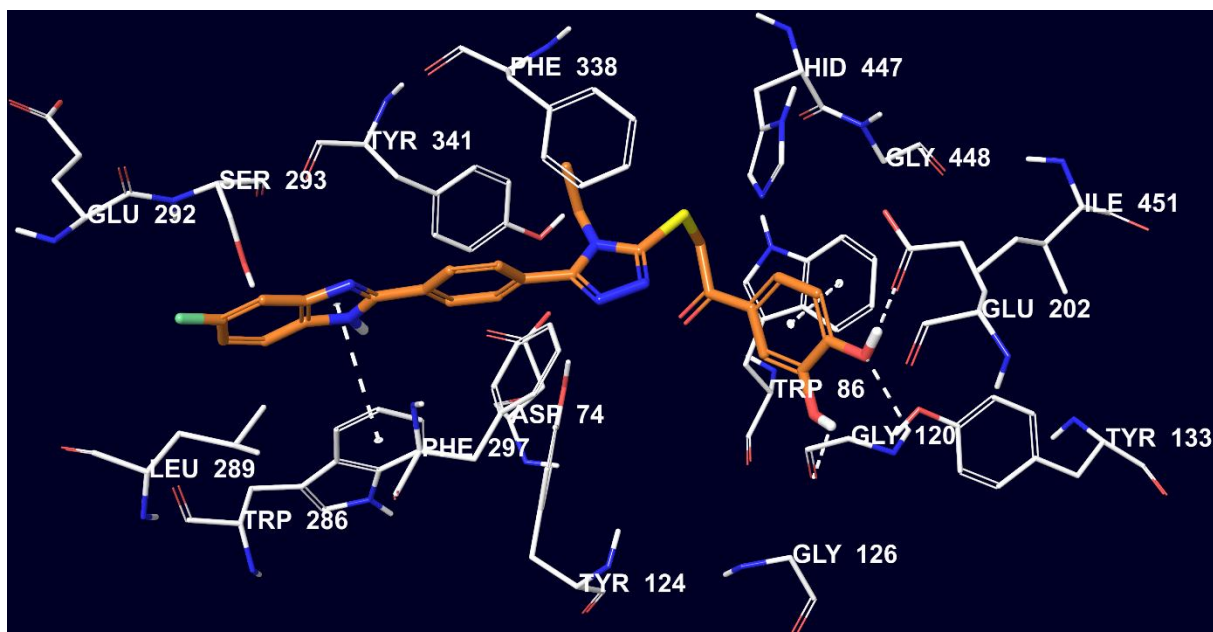

**Figure S5.** The interacting mode of compound **5p** in the active region of AChE. The inhibitor, colored with orange, and the important residues, colored with white, in the active site of the enzyme are presented by tube model.

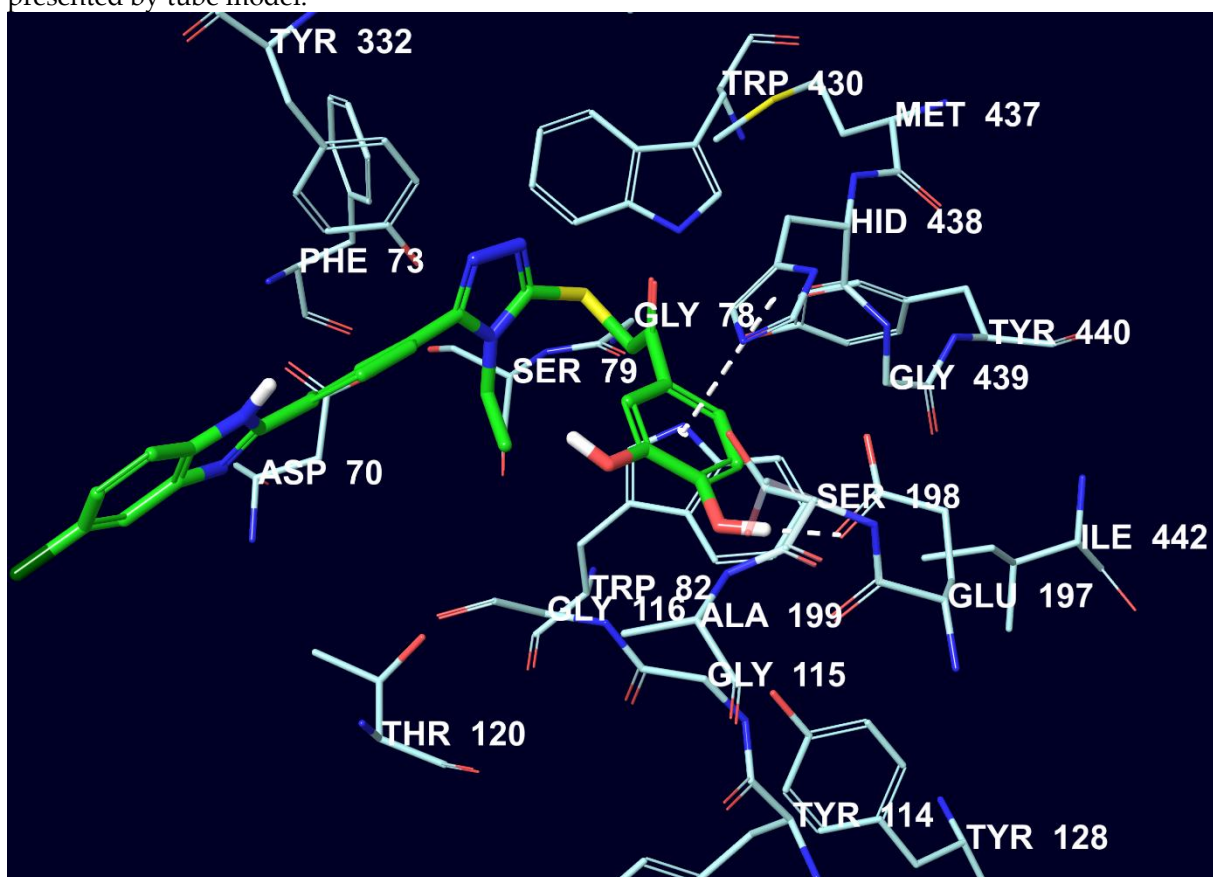

**Figure S6.** The interacting mode of compound **5h** in the active region of BChE. The inhibitor, colored with green, and the important residues, colored with turquoise, in the active site of the enzyme are presented by tube model.
